1 **Enteroendocrine cells sense bacterial tryptophan catabolites to activate enteric and vagal**  
2 **neuronal pathways**

3 Lihua Ye<sup>1,2</sup>, Munhyung Bae<sup>3</sup>, Chelsi D. Cassilly<sup>3</sup>, Sairam, V. Jabba<sup>4</sup>, Daniel W. Thorpe<sup>5</sup>, Alyce M  
4 Martin<sup>5</sup>, Hsiu-Yi Lu<sup>1</sup>, Jinhu Wang<sup>6</sup>, John D. Thompson<sup>7</sup>, Colin R. Lickwar<sup>1,2</sup>, Kenneth D. Poss<sup>7</sup>,  
5 Damien J. Keating<sup>5</sup>, Sven-Eric Jordt<sup>4</sup>, Jon Clardy<sup>3</sup>, Rodger A. Liddle<sup>2,8</sup>, and John F. Rawls<sup>1,2</sup>

6 <sup>1</sup> Department of Molecular Genetics and Microbiology, Duke Microbiome Center, Duke University  
7 School of Medicine, Durham, NC, USA 27710

8 <sup>2</sup> Division of Gastroenterology, Department of Medicine, Duke University School of Medicine,  
9 Durham, NC, USA 27710

10 <sup>3</sup> Department of Biological Chemistry and Molecular Pharmacology, Harvard Medical School,  
11 Boston, MA, USA 02115

12 <sup>4</sup> Department of Anesthesiology, Duke University School of Medicine, Durham, NC, USA 27710

13 <sup>5</sup> Flinders Medical Research Institute, College of Medicine and Public Health, Flinders University,  
14 Adelaide, Australia

15 <sup>6</sup> Division of Cardiology, School of Medicine, Emory University, Atlanta, GA, USA 30322

16 <sup>7</sup> Department of Cell Biology, Regeneration Next, Duke University School of Medicine, Durham,  
17 NC, USA 27710

18 <sup>8</sup> Department of Veterans Affairs, Durham, NC, USA 27705

19 **SUMMARY**

20 The intestinal epithelium senses nutritional and microbial stimuli using epithelial sensory  
21 enteroendocrine cells (EECs). EECs can communicate nutritional information to the nervous  
22 system, but similar mechanisms for microbial information are unknown. Using *in vivo* real-time  
23 measurements of EEC and nervous system activity in zebrafish, we discovered that the bacteria  
24 *Edwardsiella tarda* specifically activates EECs through the receptor transient receptor potential  
25 ankyrin A1 (Trpa1) and increases intestinal motility in an EEC-dependent manner. Microbial,  
26 pharmacological, or optogenetic activation of Trpa1<sup>+</sup>EECs directly stimulates vagal sensory  
27 ganglia and activates cholinergic enteric neurons through 5-HT. We identified a subset of indole  
28 derivatives of tryptophan catabolism produced by *E. tarda* and other gut microbes that potently  
29 activates zebrafish EEC Trpa1 signaling and also directly stimulates human and mouse Trpa1  
30 and intestinal 5-HT secretion. These results establish a molecular pathway by which EECs  
31 regulate enteric and vagal neuronal pathways in response to specific microbial signals.

32 **INTRODUCTION**

33 The intestine harbors complex microbial communities that shape intestinal physiology, modulate  
34 systemic metabolism, and regulate brain function. These effects on host biology are often evoked  
35 by distinct microbial stimuli including microbe-associated molecular patterns (MAMPs) and  
36 microbial metabolites derived from digested carbohydrates, proteins, lipids, and bile acids (Brown  
37 and Hazen, 2015, Liu et al., 2020, Medzhitov, 2007). The intestinal epithelium is the primary  
38 interface that mediates this host-microbe communication (Kaiko and Stappenbeck, 2014). The

39 mechanisms by which the intestinal epithelium senses distinct microbial stimuli and transmits that  
40 information to the rest of the body remains incompletely understood.

41 The intestinal epithelium has evolved specialized enteroendocrine cells (EECs) that exhibit  
42 conserved sensory functions in insects, fishes, and mammals (Guo et al., 2019, Ye et al., 2019,  
43 Furness et al., 2013). Distributed along the entire digestive tract, EECs are activated by diverse  
44 luminal stimuli to secrete hormones or neuronal transmitters in a calcium dependent manner  
45 (Furness et al., 2013). Recent studies have revealed that EECs form synaptic connections with  
46 sensory neurons (Kaelberer et al., 2018, Bellono et al., 2017, Bohorquez et al., 2015). The  
47 connection between EECs and neurons forms a direct route for the intestinal epithelium to  
48 transmit nutrient sensory information to the brain (Kaelberer et al., 2018). EECs are classically  
49 known for their ability to sense nutrients (Symonds et al., 2015) but whether they can be directly  
50 stimulated by microbes or microbially derived products is less clear. Limited examples include the  
51 observation that short chain fatty acids and branched chain fatty acids from microbial  
52 carbohydrate and amino acid catabolism activate EECs via G-protein coupled receptors (Bellono  
53 et al., 2017, Lu et al., 2018). Indole, a microbial catabolite of the amino acid tryptophan, has also  
54 been reported to activate EECs, but the EEC receptor that mediates the effect remains  
55 unidentified (Chimerel et al., 2014). With the growing understanding of gut microbiota and their  
56 metabolites, identifying the EEC receptors that recognize distinct microbial stimuli as well as the  
57 downstream pathways by which EECs transmit microbial stimuli to regulate local and systemic  
58 host physiology, has emerged as an important goal.

59 The vertebrate intestine is innervated by the intrinsic enteric nervous system (ENS) and extrinsic  
60 neurons from autonomic nerves, including sensory nerve fibers from the nodose vagal ganglia  
61 and dorsal root ganglia in the spinal cord (Furness et al., 1999). Both vagal and spinal sensory  
62 nerve fibers transmit visceral stimuli to the central nervous system and modulate a broad  
63 spectrum of brain functions (Brookes et al., 2013). A previous study demonstrated that stimulating  
64 EECs with the microbial metabolite isovalerate activates spinal sensory nerves through 5-  
65 hydroxytryptamine (5-HT) secretion (Bellono et al., 2017). Whether and how gut microbial stimuli  
66 modulate ENS or vagal sensory activity through EECs is still unknown.

67 EECs are known to express a broad diversity of receptors and channels to perceive and respond  
68 to environmental stimuli (Furness et al., 2013). Transient receptor potential ankyrin 1 (Trpa1) is  
69 an excitatory calcium-permeable non-selective cation channel that can be activated by multiple  
70 chemical irritants and has important roles in pain sensation and neurologic inflammation (Bautista  
71 et al., 2013, Lapointe and Altier, 2011). Many of the known Trpa1 agonists are chemicals derived  
72 from food spices or environmental pollution (Nilius et al., 2011). Whether microbial metabolites  
73 also activate Trpa1 is completely unknown.

74 Here, we show that Trpa1 is expressed in a subset of EECs that can be uniquely activated by gut  
75 microbes. Specifically, we identified a gram-negative bacterium, *Edwardsiella tarda* (*E. tarda*),  
76 that activates EECs in a Trpa1 dependent manner. Microbial, optochemical, or optogenetic  
77 activation of Trpa1+EECs activates vagal sensory ganglia and increases intestinal motility  
78 through direct signaling to enteric motor neurons. We also identified a subset of tryptophan  
79 catabolites that secreted from *E. tarda* and other gut microbes that potently activate Trpa1,  
80 stimulate intestinal motility, and activate vagal neurons. These results establish a molecular  
81 pathway by which EECs regulate enteric and vagal neuronal activity in response to specific  
82 microbial signals in the gut.

## 83 RESULTS

### 84 *Edwardsiella tarda* activates EECs through Trpa1

85 To identify stimuli that activate EECs in live animals, we developed a new transgenic zebrafish  
86 line that permits recording of EEC activity by expressing the calcium modulated photoactivatable  
87 ratiometric integrator (CaMPARI) protein in EECs under control of the *neurod1* promoter (Fig. 1A,  
88 Fig. S1A-F; see Methods for details). When exposed to 405nm light, CaMPARI protein irreversibly  
89 photoconverts from a configuration that emits green light to one that emits red in a manner  
90 positively correlated with intracellular calcium levels  $[Ca^{2+}]_i$ . A high red:green CaMPARI ratio thus  
91 reports high intracellular calcium (Fosque et al., 2015). This EEC-CaMPARI system therefore  
92 enables imaging of the calcium activity history of intestinal EECs in the intact physiologic context  
93 of live free-swimming animals (Fig. 1A-B, Fig. S1G-J). To test the validity of this EEC-CaMPARI  
94 system, we first stimulated larvae with different nutrients known to activate zebrafish EECs (Ye et  
95 al., 2019). Exposure to only water as a vehicle control revealed an expected low basal red:green  
96 CaMPARI ratio (Fig. 1C, E-F). Following long-chain fatty acid stimulation with linoleate, a  
97 subpopulation of EECs displayed high red:green CaMPARI ratio (Fig. 1D, E-F). EECs with a high  
98 red:green CaMPARI ratio were classified as “activated EECs”. The percentage of activated EECs  
99 significantly increased in response to chemical stimuli known to activate EECs, including linoleate,  
100 oleate, laurate, and glucose (Fig. 1F), but not in response to the short chain fatty acid butyrate,  
101 consistent with our previous finding (Fig. 1F) (Ye et al., 2019).

102 We next applied the EEC-CaMPARI system to ask whether EECs acutely respond to live bacterial  
103 stimulation *in vivo*. We exposed *Tg(neurod1:CaMPARI)* zebrafish to individual bacterial strains  
104 for 20 mins in zebrafish housing water (GZM), followed by photoconversion and imaging of  
105 CaMPARI fluorescence. For these experiments, we selected a panel of 11 bacterial strains  
106 including 3 model species (*P. aeruginosa*, *E. coli*, *B. subtilis*), 7 commensal strains isolated from  
107 the zebrafish intestine (Rawls et al., 2006, Stephens et al., 2016), and the pathogen *E. tarda* FL6-  
108 60 (also called *E. piscicida* (Abayneh et al., 2013, Bujan et al., 2018); Fig. 1K and Key Resources  
109 Table). Within this panel, the only strain that induced a high red:green EEC-CaMPARI signal was  
110 *E. tarda* (Fig. 1G-K). We further confirmed that *E. tarda* directly activates EECs using an  
111 alternative reporter of EEC activity based on the  $[Ca^{2+}]_i$ -sensitive fluorescent protein *Gcamp6f*  
112 (*neurod1:Gcamp6f*) (Fig. 1L, Fig. S1K-P and Video 1) (Ye et al., 2019). Although *E. tarda* has  
113 been reported to infect zebrafish (Abayneh et al., 2013, Flores et al., 2020), we observed no overt  
114 pathogenesis in these acute exposure experiments.

115 EECs express a variety of sensory receptors that can be activated by different environmental  
116 stimuli. To investigate the molecular mechanisms by which EECs perceive *E. tarda* stimulation,  
117 we isolated EECs from zebrafish larvae and performed RNA-seq analysis. Transcript levels in  
118 FACS-sorted EECs (*cldn15la:EGFP+*; *neurod1:TagRFP+*) were compared to all other intestinal  
119 epithelial cells (IECs) (*cldn15la:EGFP+*; *neurod1:TagRFP-*) (Fig. 2A). We identified 192 zebrafish  
120 transcripts that were significantly enriched in EECs by DESeq2 using  $P_{FDR} < 0.05$  (Fig. 2B and  
121 Table S1). Gene Ontology (GO) term analysis revealed that those zebrafish genes are enriched  
122 for processes like hormone secretion, chemical synaptic transmission and neuropeptide signaling  
123 (Table S1). To identify gene homologs enriched in EECs in both zebrafish and mammals, we  
124 compared these 192 genes to published RNA-seq data from *Neurod1+* EECs from mouse  
125 duodenum and CHGA+ EECs from human jejunum (Roberts et al., 2019). Despite the  
126 evolutionary distance and differences in tissue origin, we found that 24% of zebrafish EEC-  
127 enriched gene homologs (46 out of 192) were shared among zebrafish, human, and mouse, and

128 that 40% of zebrafish EEC-enriched genes (78 out of 192) were shared between zebrafish EECs  
129 and human jejunal EECs (Table S2). The genes with conserved EEC expression include those  
130 encoding specific hormones, transcription factors, G-protein coupled receptors, and ion channels  
131 that regulate membrane potential (Fig. 2C and Table S3). Using published data from mouse  
132 intestinal epithelial single-cell RNA-seq data that revealed different EEC subtypes (Haber et al.,  
133 2017), we found that many of the signature genes in mouse enterochromaffin cells (EC), which  
134 are identified by their 5-HT synthesis, are enriched in zebrafish EECs (Table S3). Among these  
135 conserved EEC-enriched genes, one of the genes with the highest expression in zebrafish EECs  
136 is transient receptor potential ankyrin 1 (*Trpa1*) (Fig. 2C and Table S1, 2).

137 The zebrafish genome encodes two *trpa1* paralogs, *trpa1a* and *trpa1b* (Prober et al., 2008).  
138 Zebrafish EECs express *trpa1b* but not *trpa1a*, as revealed by our RNA-seq data (Fig. S2A) and  
139 RT-PCR confirmation in FACS-isolated EECs (Fig. S2B). Fluorescence imaging of  
140 *TgBAC(trpa1b:EGFP)* zebrafish (Pan et al., 2012) further revealed that *trpa1b* is expressed within  
141 the intestinal epithelium by a distinct subset of cells expressing the EEC marker *neurod1* (Fig.  
142 2D-E). In addition, zebrafish EECs were activated by exposure to the *Trpa1* agonist allyl  
143 isothiocyanate (AITC) (Fig. 2F, Fig. S2C, G and Video 2), whereas this response was inhibited  
144 by the *Trpa1* antagonist HC030031 (Fig. S2D). AITC was unable to induce EEC activation in  
145 zebrafish homozygous for a *trpa1b* mutation but was able to induce EEC activation normally in  
146 *trpa1a* mutants (Prober et al., 2008) (Fig. 2F, Fig. S2E-F and Video 2). These data establish that  
147 *trpa1b*, but not *trpa1a*, is expressed by a subset of zebrafish EECs and is required for EEC  
148 activation by *Trpa1* agonist AITC.

149 *Trpa1* is a nociception receptor that is known to mediate pain sensation in nociceptive neurons  
150 (Lapointe and Altier, 2011). A broad spectrum of chemical irritants, including many compounds  
151 that are derived from food spices, activate *Trpa1* (Nilius et al., 2011). In addition to chemical  
152 irritants, certain bacterial products, including lipopolysaccharide (LPS) and hydrogen sulfide (H<sub>2</sub>S),  
153 stimulated nociceptive neurons in a *Trpa1*-dependent manner (Meseguer et al., 2014). Since the  
154 expression of classic microbial pattern recognition receptors is very low in zebrafish EECs (Table  
155 S3), we tested if *Trpa1* mediated *E. tarda*-induced EEC activation. We first observed that  
156 treatment of wild-type (WT) *Tg(neurod1:CaMPARI)* fish with the *Trpa1* antagonist HC030031  
157 significantly inhibited *E. tarda*'s ability to induce EEC activation (Fig. 2G-J). The ability of *E. tarda*  
158 to induce EEC activity in the EEC-CaMPARI model was similarly blocked in *trpa1b* mutant  
159 zebrafish (Fig. 2K-N). In accord, experiments in *Tg(neurod1:Gcamp6f)* zebrafish confirmed that  
160 *Gcamp6f* fluorescence increased in EECs in response to *E. tarda* stimulation in WT, but not *trpa1b*  
161 mutant zebrafish (Fig. 2O-R). Therefore live *E. tarda* bacteria stimulate EECs in a *Trpa1*-  
162 dependent manner, suggesting that EEC *Trpa1* signaling may play an important role in mediating  
163 microbe-host interactions.

#### 164 **EEC *Trpa1* signaling is important to maintain microbial homeostasis by regulating** 165 **intestinal motility**

166 To determine how *E. tarda*-induced *Trpa1* signaling in EECs affects the host, we exposed  
167 *trpa1b*<sup>+/+</sup> and *trpa1b*<sup>-/-</sup> zebrafish larvae to an *E. tarda* strain that expresses mCherry fluorescent  
168 protein. High-dose (10<sup>7</sup> CFU/mL) *E. tarda* exposure for 3 days decreased survival rate and caused  
169 gross pathology (Fig. S2M-N), consistent with its reported activity as a zebrafish pathogen  
170 (Abayneh et al., 2013, Flores et al., 2020). To investigate the interaction between *E. tarda* and  
171 *Trpa1*+EECs under relatively normal physiological conditions, we exposed zebrafish with a low *E.*  
172 *tarda* dose (10<sup>6</sup> CFU/mL) that did not significantly affect survival rate or cause gross pathology

173 (Fig. S2M-N and Fig. 3A). When reared under conventional conditions in the absence of *E. tarda*,  
174 we observed no significant difference in the abundance of culturable gut microbes between  
175 *trpa1b<sup>+/+</sup>* and *trpa1b<sup>-/-</sup>* zebrafish (Fig. S2H-I). However, upon 3-day treatment with *E. tarda*, there  
176 was significant accumulation of *E. tarda* mCherry<sup>+</sup> bacteria in the intestinal lumen in *trpa1b<sup>-/-</sup>* but  
177 not *trpa1b<sup>+/+</sup>* zebrafish larvae (Fig. 3A-C). This accumulation could be observed by either  
178 quantifying *E. tarda* mCherry fluorescence (Fig. 3D) or counting *E. tarda* colony forming units  
179 (CFU) from digestive tracts dissected from *E. tarda* treated *trpa1b<sup>+/+</sup>* and *trpa1b<sup>-/-</sup>* zebrafish (Fig.  
180 3E). This suggests that Trpa1 signaling may act as a host defense mechanism to facilitate  
181 clearance of specific types of bacteria such as *E. tarda*.

182 In addition to EECs, Trpa1 is also expressed in mesenchymal cells within the intestine (Fig.2D-E  
183 and Fig. S4O) and nociceptive sensory neurons (Yang et al., 2019, Holzer, 2011). To investigate  
184 whether the phenotype we observed above is specifically mediated by EECs, we generated a  
185 new Cre-*loxP* transgenic system that permits specific ablation of EECs without affecting other  
186 IECs or other *neurod1* expressing cells like CNS or pancreatic islets (Fig. 3F, Fig. S2J).  
187 Quantitative RT-PCR and immunofluorescence confirmed a reduction of EEC hormones but not  
188 non-EEC marker genes (Fig. S2K-L). Establishing this EEC ablation system allowed us to define  
189 the specific role of EECs in mediating *E. tarda*-host interaction. As with *trpa1b<sup>-/-</sup>* zebrafish, we did  
190 not detect significant differences in gut microbial abundance between unexposed WT and EEC-  
191 ablated zebrafish (Fig. S2O). However, in response to *E. tarda* exposure, a significantly higher  
192 amount of *E. tarda* mCherry accumulated in EEC-ablated zebrafish compared to WT sibling  
193 controls (Fig. 3H and Fig. S2P-Q). Together, these data establish that EEC Trpa1 signaling  
194 maintains gut microbial homeostasis by facilitating host clearance of specific types of bacteria like  
195 *E. tarda*.

196 To understand the mechanisms by which EEC Trpa1 regulates gut microbial homeostasis, we  
197 used an opto-pharmacological approach that permits temporal control of EEC Trpa1 activation  
198 through UV light exposure (Fig. 4A). We pretreated zebrafish with Optovin, a chemical that  
199 specifically activates Trpa1 only in the presence of UV light (Kokel et al., 2013) (Fig. S3A). To  
200 specifically activate Trpa1 in EECs, we mounted zebrafish larvae pretreated with Optovin and  
201 restricted UV light exposure specifically to the intestinal epithelium using a confocal laser (Fig.  
202 S3A). UV light activation significantly increased  $[Ca^{2+}]_i$  in a subpopulation of EECs in WT larvae,  
203 as measured by Gcamp6f fluorescence (Fig. S3B-C, Video 3). The same UV light exposure in  
204 *trpa1b<sup>-/-</sup>* larvae pretreated with Optovin did not increase EEC  $[Ca^{2+}]_i$  (Fig. 4B-C), indicating that  
205 EEC activation induced by Optovin-UV was dependent on Trpa1. Next, we used this approach to  
206 examine the effect of EEC Trpa1 activation on intestinal motility. Trpa1 activation in EECs within  
207 the middle intestine via UV light application in WT larvae produced a propulsive movement of the  
208 intestine from anterior to posterior, and the velocity of intestinal motility increased accordingly (Fig.  
209 4D-F, Fig. S3D-E and Video 4). In contrast, Optovin treatment and UV activation failed to induce  
210 intestinal motility in EEC-ablated zebrafish (Fig. 4D-F and Video 5). These results indicate that  
211 intestinal motility triggered by Trpa1 activation is dependent on EECs. To further test if signaling  
212 from Trpa1+EECs is sufficient to activate intestinal motility, we developed a new optogenetic  
213 system in which a mCherry tagged Channelrhodopsin (ChR2-mCherry) is expressed in EECs  
214 from the *neurod1* promoter (Fig. 4G-H). Blue light activation of ChR2 causes cation influx and  
215 plasma membrane depolarization, and  $[Ca^{2+}]_i$  then increases through the activation of voltage-  
216 dependent calcium channels (Nagel et al., 2003) which are abundantly expressed in zebrafish  
217 EECs (Fig. 4I-J, Table S3 and Video 6). This new tool permits selective activation of the ChR2-  
218 mCherry<sup>+</sup> EECs using a confocal laser, without affecting the activity of nearby EECs (see

219 Methods and Fig. S3F). We therefore used *Tg(neurod1:Gal4); Tg(UAS:ChR2-mCherry);*  
220 *TgBAC(trpa1b:EGFP)* larvae to selectively activate ChR2-mCherry expressing EECs that are  
221 either *trpa1b+* or *trpa1b-*. We found that activation of *trpa1b+* EECs but not *trpa1b-* EECs  
222 consistently increased intestinal velocity magnitude (Fig. 4K-L, Fig. S3F-H and Video 7, 8), again  
223 indicating a unique role for Trpa1+EECs in regulating intestinal motility. Consistent with the  
224 Optovin-UV result, stimulating Trpa1+ChR2+ EECs in the middle intestine resulted in anterograde  
225 intestinal movement (Video 8). Interestingly, stimulating Trpa1+ChR2+ EECs in the proximal  
226 intestine initiated a retrograde intestinal movement (Video 7). This is consistent with previous  
227 findings that the zebrafish proximal intestine typically exhibits a retrograde motility pattern  
228 whereas the middle and distal intestine display antegrade motility (Fig. S3D) (Roach et al., 2013).  
229 Finally, we tested whether microbial activation of Trpa1 signaling in EECs also increased intestinal  
230 motility. Using microgavage (Cocchiario and Rawls, 2013), we found that delivery of live *E. tarda*  
231 into the intestinal lumen significantly promoted intestinal peristalsis and motility compared to PBS-  
232 gavaged controls (Fig. 4M-O and Video 9). *E. tarda* induced intestinal motility was significantly  
233 reduced in *trpa1b-/-* zebrafish (Fig. S3I). When we gavaged zebrafish with *Aeromonas* or *Bacillus*,  
234 two of the tested bacterial strains that do not activate EECs (Fig. 1), no significant change of  
235 intestinal motility was observed (Fig. 4M-O and Video 9). These experiments together establish  
236 that activation of Trpa1 in EECs directly stimulates intestinal motility, and provide a potential  
237 physiologic mechanism underlying Trpa1-dependent clearance of *E. tarda* from the intestinal  
238 lumen.

### 239 **EEC Trpa1 signaling promotes intestinal motility by activating cholinergic enteric neurons**

240 To test the role of the ENS in Trpa1-activated intestinal motility, we used zebrafish that lack an  
241 ENS due to mutation of the receptor tyrosine kinase gene *ret* (Taraviras et al., 1999).  
242 Immunofluorescence demonstrated that *ret<sup>-/-</sup>* zebrafish lack all identifiable enteric nerves (marked  
243 by *NBT* transgenes, Fig. 5B and Fig. S4A-B), whereas EECs remain intact (marked by *neurod1*  
244 transgenes, Fig. 5B) and responsive to Trpa1 agonist (Fig. S4C-F). Using the Optovin-UV system  
245 (Fig. 5A), we observed that EEC Trpa1 activation increased intestinal motility in control (*ret<sup>+/+</sup>* or  
246 *ret<sup>+/-</sup>*) but not *ret<sup>-/-</sup>* zebrafish (Fig. 5C-D and Fig. S4G-H). These results were confirmed using a  
247 second zebrafish mutant that lacks an ENS due to mutation of the transcription factor gene *sox10*  
248 (Bondurand and Sham, 2013). Similar to *ret<sup>-/-</sup>* zebrafish larvae, *sox10<sup>-/-</sup>* zebrafish larvae lack an  
249 ENS but the EECs remain intact (Fig. S4I-L), and failed to increase intestinal motility following  
250 activation of EEC-Trpa1 signaling (Fig. S4M-N). These data suggest that Trpa1+ EECs do not  
251 signal directly to enteric smooth muscle to promote intestinal motility, but instead signal to the  
252 ENS.

253 The ENS is a complex network composed of many different neuronal subtypes. Among these  
254 subtypes, cholinergic neurons secrete the excitatory neurotransmitter acetylcholine to stimulate  
255 other enteric neurons or smooth muscle (Pan and Gershon, 2000, Qu et al., 2008). The  
256 cholinergic neurons are essential for normal intestinal motility (Johnson et al., 2018). One of the  
257 key enzymes for the synthesis of acetylcholine in the ENS is choline acetyltransferase (Chat)  
258 (Furness et al., 2014). Using *TgBAC(chata:Gal4); Tg(UAS:NTR-mCherry)* transgenic zebrafish,  
259 we were able to visualize the cholinergic enteric neurons in the zebrafish intestine (Fig. 5E and  
260 Fig. S5E-J). We found that *chata+* neurons have smooth cell bodies which are located within the  
261 intestinal wall, many of which display multiple axons (Fig. 5E and Fig. S5E-F). Such multipolar  
262 neurons have also been classified as Dogiel type II neurons (Cornelissen et al., 2000). These  
263 Dogiel type II neurons are likely to be the intestinal intrinsic sensory neurons (Bornstein, 2006).

264 We used *Tg(neurod1:LifeAct-EGFP)*; *TgBAC(chata:Gal4)*; *Tg(UAS:NTR-mCherry)* zebrafish to  
265 reveal that many EECs labeled by *neurod1* form direct contacts with nerve fibers extending from  
266 *chata+* enteric neurons (Fig. 5F and Fig. S5G, H). Analysis of the secretory cell marker 2F11 in  
267 *TgBAC(chata:Gal4)*; *Tg(UAS:NTR-mcherry)* animals also revealed a subpopulation of EECs that  
268 directly contact *chata+* enteric nerve fibers (Fig. 5F, Fig. S5I-J and Video 10). Interestingly, those  
269 EECs that directly contact *chata+* enteric neurons include some *Trpa1*+EECs (Fig. 5G-H).  
270 Previous mouse studies demonstrated that some EECs possess neuropods that form synaptic  
271 connections with sensory neurons (Bohorquez et al., 2015, Bellono et al., 2017, Kaelberer et al.,  
272 2018). We found that zebrafish EECs also possess neuropods marked by the presynaptic marker  
273 SV2 (Fig. S5A-C) and are enriched for transcripts encoding presynaptic vesicle proteins (Fig. S5P  
274 and Table S1). Similar to mammalian EECs, zebrafish EEC neuropods also contain abundant  
275 mitochondria (Fig. S5D) (Bohorquez et al., 2014). Therefore, zebrafish EECs may have an  
276 evolutionarily conserved function to signal to neurons, as seen in mammals.

277 The direct contact of *Trpa1*+EECs with *chata+* neurons suggested a direct signal to cholinergic  
278 enteric neurons. To investigate whether activation of *Trpa1*+EECs stimulates *chata+* enteric  
279 neurons, we employed *TgBAC(chata:Gal4)*; *Tg(UAS:Gcamp6s)* zebrafish, which permit recording  
280 of *in vivo* calcium activity in *chata+* neurons (Fig. 5I-J). Upon *Trpa1*+EEC activation, *Gcamp6s*  
281 fluorescence increased in *chata+* enteric motor neurons (Fig. 5K, L and Video 11).  
282 Immunofluorescence results indicated that *Trpa1* is not expressed in *chata+* enteric motor  
283 neurons or in any other ENS cells (Fig. S6O-R). This result indicated that *chata+* enteric motor  
284 neurons cannot be directly activated by optic *Trpa1* stimulation but are instead activated via  
285 stimulation by *Trpa1*+ EECs. Previous studies suggested that in addition to the enteric nervous  
286 system, efferent vagal nerves also play an important role in modulating intestinal motility (Travagli  
287 and Anselmi, 2016). To examine whether *Trpa1*+EEC induced intestinal motility is indirectly  
288 mediated via the vagus nerve, we anatomically disconnected zebrafish intestine from the CNS by  
289 decapitation (Fig. S5K). Neither *Trpa1*+EEC activation-induced intestinal motility nor *chata+*  
290 enteric neuron calcium concentration was affected by decapitation (Fig. S5L-O), suggesting a  
291 dispensable role of vagal efferent nerves in *Trpa1*+EEC induced intestinal motility. These data  
292 indicate that *Trpa1*+EEC induced intestinal motility is mediated by intrinsic enteric circuitry and  
293 likely involves *chata+* enteric neurons.

294 Previous mouse studies demonstrated that *Trpa1* mRNA is highly enriched in 5-HT-secreting EC  
295 cells in the small intestine of mammals (Nozawa et al., 2009). Immunofluorescence staining  
296 indicated that, similar to mammals, 5-HT expression in the zebrafish intestinal epithelium is also  
297 highly enriched in *Trpa1*+EECs (Fig. 5M). 5-HT in EECs is synthesized from tryptophan via  
298 tryptophan hydroxylase 1 (*Tph1*) (Li et al., 2011). Zebrafish possess two *Tph1* paralogs, *tph1a*  
299 and *tph1b* (Ulhaq and Kishida, 2018), but only *tph1b* is expressed in zebrafish EECs (Fig. S5S).  
300 The expression of *tph1b* in *Trpa1*+EECs was also confirmed by crossing a new  
301 *Tg(tph1b:mCherry-NTR)* transgenic line to *TgBAC(trpa1b:EGFP)* zebrafish (Fig. 5N and Fig.  
302 S5Q-R, T-U). To investigate whether 5-HT mediates EEC *Trpa1*-induced intestinal motility, we  
303 tested whether a similar response was present in *tph1b<sup>+/+</sup>* and *tph1b<sup>-/-</sup>* zebrafish larvae (Tornini et  
304 al., 2017) using the Optovin-UV platform. Under baseline conditions, we did not observe a  
305 significant difference in intestinal motility between *tph1b<sup>+/+</sup>* and *tph1b<sup>-/-</sup>* zebrafish (Fig. S5V).  
306 However, in response to UV stimulated EEC *Trpa1* activation, intestinal motility was significantly  
307 reduced in *tph1b<sup>-/-</sup>* compared to *tph1b<sup>+/+</sup>* zebrafish (Fig. 5O). These findings suggest a working  
308 model in which *Trpa1*+EECs signal to cholinergic enteric neurons through 5-HT, which in turn  
309 stimulates intestinal motor activity and promotes intestinal motility.

## 310 **Chemical and microbial stimulation of EEC Trpa1 signaling activate vagal sensory ganglia**

311 The intestine is innervated by both intrinsic ENS and extrinsic sensory nerves from the brain and  
312 spinal cord (Brookes et al., 2013). In mammals, afferent neuronal cell bodies of the vagus nerve  
313 reside in the nodose ganglia and travel from the intestine to the brainstem to convey visceral  
314 information to the CNS. However, in zebrafish, it is unknown if the vagal sensory system  
315 innervates the intestine. The zebrafish vagal sensory ganglia can be labelled using  
316 *TgBAC(neurod1:EGFP)* or immunofluorescence staining of the neuronal marker acetylated  $\alpha$   
317 Tubulin (Ac- $\alpha$ Tub) (Fig. 6B). Using lightsheet confocal imaging, we demonstrated that not only  
318 does the vagal ganglia in zebrafish extend projections to the intestine (Fig. 6B-C and Fig. S6A-B)  
319 but vagal sensory nerve fibers directly contact a subpopulation of EECs (Fig. 6D). Using the  
320 *Tg(neurod1:cre); Tg( $\beta$ -act2:Brainbow)* transgenic zebrafish system (Gupta and Poss, 2012)  
321 (Vagal-Brainbow), in which individual vagal ganglion cells are labeled with different fluorescent  
322 colors through Cre recombination (Foglia et al., 2016) (Fig. S6C), we revealed that the zebrafish  
323 vagal sensory ganglia cells also directly project to the vagal sensory region in the hindbrain (Fig.  
324 6E-F). Using this Vagal-Brainbow system, we found vagal sensory nerves that are labelled by Cre  
325 recombination in both the proximal and distal intestine (Fig. S6D-G). To further visualize the vagal  
326 sensory network in zebrafish, we used *Tg(isl1:EGFP)* zebrafish in which EGFP is expressed in  
327 vagal sensory ganglia and overlaps with *neurod1* (Fig. 6G and Fig. S6H-J). Our data revealed  
328 that after leaving the vagal sensory ganglia, the vagus nerve travels along the esophagus and  
329 enters the intestine in the region between the pancreas and the liver (Fig. 6G and Fig. S6I-J).  
330 Direct contact of EECs and the vagus nerve could also be observed in *Tg(isl1:EGFP);*  
331 *Tg(neurod1:TagRFP)* zebrafish (Fig. 6H). These data demonstrate the existence of a vagal  
332 network in the zebrafish intestine.

333 We next investigated whether this vagal network is activated in response to enteric microbial  
334 stimulation with *E. tarda*. We gavaged *Tg(neurod1:Gcamp6f); Tg(neurod1:TagRFP)* zebrafish  
335 larvae with either PBS or live *E. tarda* bacteria. We found that 30 min after enteric stimulation with  
336 Trpa1 agonist AITC or *E. tarda*, but not after PBS vehicle stimulation, Gcamp6f fluorescence  
337 intensity significantly increased in a subset of vagal sensory neurons (Fig. 6I-K, Fig. S6K-L and  
338 Video 12). This result indicated that acute enteric chemical or microbial stimulation directly  
339 activated vagal sensory neurons. To further investigate whether the vagal activation induced by  
340 enteric *E. tarda* was mediated by Trpa1+EECs, we used a published method that labels active  
341 zebrafish neurons through pERK immunofluorescence staining (Randlett et al., 2015) to measure  
342 vagal activity. Delivering AITC into the zebrafish intestine by microgavage (Cocchiario and Rawls,  
343 2013) increased the number of pERK+ vagal cells compared to PBS treatment (Fig. 6L-N, R).  
344 AITC-induced vagal activation was abrogated in the absence of EECs (Fig. 6N, R), indicating that  
345 Trpa1 signaling in the intestine increases vagal sensory activity in an EEC-dependent manner.  
346 Next, we gavaged live *E. tarda* bacteria into both WT and EEC-ablated zebrafish. Similar to Trpa1  
347 chemical agonist stimulation, *E. tarda* gavage increased the number of activated pERK+ vagal  
348 sensory neurons in WT zebrafish (Fig. 6O-Q, S) but not in EEC ablated zebrafish (Fig. 6Q, S).  
349 Furthermore, the vagal activation induced by enteric *E. tarda* was dependent on Trpa1 as pERK+  
350 vagal cell number was significantly reduced in *E. tarda* treated *trpa1b<sup>-/-</sup>* zebrafish (Fig. 6T).  
351 Together, these results reveal that chemical or microbial stimuli in the intestine can stimulate  
352 Trpa1+ EECs, which then signal to the vagal sensory ganglia.

## 353 **Tryptophan catabolites secreted from *E. tarda* activate the EEC Trpa1 gut-brain pathway**



354 In order to identify the molecular mechanism by which *E. tarda* activates Trpa1 in EECs, we  
355 examined the effects of live and killed *E. tarda* cells and cell-free supernatant (CFS) from *E. tarda*  
356 cultures on EEC calcium activity (Fig. 7A). Formalin-killed or heat-killed *E. tarda* cells failed to  
357 stimulate EECs, however, CFS, at levels comparable to live *E. tarda* cells, stimulated EECs (Fig.  
358 7A-B). The ability of *E. tarda* CFS to activate EECs was diminished in *trpa1b* mutant zebrafish  
359 (Fig. 7C), suggesting that a factor secreted from *E. tarda* has the ability to activate Trpa1 in EECs.  
360 HPLC-MS analysis revealed that *E. tarda* CFS is enriched for several indole ring-containing  
361 tryptophan catabolites (Fig. 7D and Fig. S7A-C), three of the most abundant being indole,  
362 tryptophol (IEt), and indole-3-carboxyaldehyde (IAld) (Fig. 7D and Fig. S7A-C). To test if other  
363 bacteria secrete tryptophan catabolites like *E. tarda*, we performed similar HPLC-MS analysis of  
364 CFS from bacteria we previously tested for EEC activation (Fig.1K). Although several tested  
365 bacterial strains produced indole or IAld when cultured in nutrient-rich medium (Fig. S7D), *E. tarda*  
366 was the only bacteria that uniquely retained a high level of indole and IAld production when  
367 cultured in zebrafish GZM housing water (Fig. 7E), consistent with our finding that *E. tarda*  
368 uniquely activates zebrafish EECs when added into GZM water (Fig. 1K). To investigate whether  
369 these tryptophan metabolites were directly linked with *E. tarda* pathogenesis, we tested two other  
370 *E. tarda* strains (*E. tarda* 23685 and *E. tarda* 15974) which were isolated from human gut  
371 microbiota and do not cause fish pathogenesis (Yang et al., 2012, Srinivasa Rao et al., 2003,  
372 Nakamura et al., 2013). Both *E. tarda* strains activated EECs and exhibited similar indole and IAld  
373 secretion capacity as pathogenic *E. tarda* FL6-60 and *E. tarda* LSE40 (Fig. 7E and Fig. S7G-H).  
374 This result suggested that tryptophan catabolites production, EEC Trpa1 activation and its  
375 downstream consequences may be distinct from *E. tarda* pathogenesis in fish (Edwardsiellosis),  
376 which is characterized by abdominal swelling, petechial hemorrhage in fin and skin, rectal hernia  
377 and purulent inflammation in the kidney, liver and spleen (Park et al., 2012).

378 We next tested if *E. tarda* tryptophan catabolites activate EECs. Indole and IAld, but not other  
379 tested tryptophan catabolites, strongly activated zebrafish EECs in a *trpa1b*-dependent manner  
380 (Fig. 7F-G, Fig. S7F and Video 13, 14). Indole and IAld also activated the human TRPA1 receptor  
381 transfected into HEK cells (Fig. 7H-J and Fig. S7I-J). Both indole and IAld exhibited full TRPA1  
382 agonist activity with an efficiency comparable to cinnamaldehyde (CAD), a well characterized  
383 TRPA1 activator (Fig. 7I-J and Fig. S7I-J) (Macpherson et al., 2007). Both indole and IAld also  
384 activated mouse Trpa1, but in a less potent manner (Fig. S7M). Both indole- and IAld-induced  
385 human and mouse Trpa1 activation were blocked by the TRPA1 inhibitor A967079 (Fig. 7J and  
386 Fig. S7K-L, N). These results establish that indole and IAld that are derived from microbial  
387 tryptophan catabolism are novel and evolutionarily-conserved agonists of vertebrate TRPA1  
388 receptors.

389 Next, we investigated whether indole and IAld can mimic live *E. tarda* bacterial stimulation and  
390 activate a similar gut-brain pathway through EEC Trpa1 signaling. Stimulating zebrafish larvae  
391 with indole directly induced an increase in intestinal motility (Fig. S8A-D). Using  
392 *Tg(neurod1:Gcamp6f);Tg(neurod1:TagRFP)* zebrafish in which vagal calcium levels can be  
393 recorded *in vivo*, we found that enteric delivery of indole or IAld by microgavage increased  
394 Gcamp6f fluorescence in a subset of vagal sensory neurons (Fig. 7K-O, Fig. S8E-F). This vagal  
395 sensory neuron activation induced by enteric indole was abrogated in zebrafish larvae lacking  
396 EECs (Fig. 7K-O, Fig. S8E-F). Previous studies demonstrated that the transcription factor Aryl  
397 hydrocarbon receptor (AhR) can be activated by many microbially derived tryptophan metabolites  
398 including IAld, and gut microbes have been shown to increase intestinal motility via upregulating  
399 AhR in mice (Obata et al., 2020, Zelante et al., 2013). To test whether AhR is involved in

400 Trpa1+EEC induced intestinal motility, we applied two well-established AhR inhibitors, CH223191  
401 and folic acid (Kim et al., 2020, Puyskens et al., 2020). However, treatment of zebrafish with these  
402 AhR inhibitors was insufficient to block *E. tarda* intestinal accumulation or Optovin-UV-induced  
403 intestinal motility (Fig. S8G-L). This finding suggests that *E. tarda* or Trpa1+EEC-induced  
404 intestinal motility is not mediated via AhR but instead through a Trpa1+EEC dependent  
405 mechanism.

406 Many microbial tryptophan metabolites, including indole and IAld, are known to be produced by  
407 mammalian commensal microbes (Roager and Licht, 2018). Previous studies demonstrated that  
408 Trpa1+EECs are restricted to the mouse and human small intestine and not found in the colon  
409 (Yang et al., 2019, Billing et al., 2019). We therefore analyzed the tryptophan metabolite  
410 concentrations in the small intestine and colon from conventionally-reared mice. We detected  
411 several tryptophan metabolites including indole and IAld in the colon as expected, whereas none  
412 of these metabolites were detected in the small intestine (Fig. S8G-H). This suggests that these  
413 microbial tryptophan metabolites may not significantly contribute to the small intestinal motility  
414 under normal physiological condition in mammals. However, under abnormal conditions where  
415 microbes and their tryptophan metabolites become elevated in the small intestine (e.g., small  
416 intestinal bacterial overgrowth), activated Trpa1+EECs would stimulate enteric and vagal sensory  
417 neurons and modulate intestinal motility and brain signaling. To test this model, we used  
418 amperometry on fresh tissue sections from human and mouse small intestine to measure the  
419 impact of acute indole exposure on 5-HT secretion. As predicted, indole was able to significantly  
420 induce 5-HT secretion from both human and mouse small intestine, and this effect was blocked  
421 by the Trpa1 inhibitor HC030031 (Fig. 7P-R). These data support our model and further suggest  
422 that these microbial tryptophan catabolites may modulate intestinal motility and gut-brain  
423 communication in humans.

## 424 **DISCUSSION**

### 425 **Trpa1+EECs are frontline intestinal sensors**

426 To monitor the complex and dynamic chemical and microbial environment within the intestinal  
427 lumen, animals evolved specialized sensory cells in the intestinal epithelium known as EECs  
428 (Furness et al., 2013). EECs are distinguished from other intestinal epithelial cells by their  
429 remarkable ability to respond to a wide range of nutrients and other chemicals and to secrete a  
430 variety of peptide hormones and neurotransmitters. Recent studies suggest that mammalian  
431 EECs display complex heterogeneity (Gehart et al., 2019). A unique EEC subtype defined in  
432 mammals is the enterochromaffin cell (EC) which produces the neurotransmitter 5-HT (Gershon,  
433 2013). A subset of zebrafish EECs are also known to express 5-HT (Roach et al., 2013). In the  
434 current study, we identified a Trpa1 expressing EEC subtype that uniquely responds to specific  
435 microbial stimulation. We also found that zebrafish Trpa1+EECs include the majority of EECs that  
436 express 5-HT, revealing similarity between zebrafish Trpa1+EECs and mammalian ECs. In accord,  
437 mammalian EC have also been shown to express Trpa1 (Bellono et al., 2017). Our study provides  
438 further evidence that Trpa1+EECs respond to chemical and microbial stimuli to inform both the  
439 ENS and the vagal sensory nervous system. Thus, Trpa1+EECs appear to be uniquely positioned  
440 to protect the organism from harmful chemical and microbial stimuli by regulating GI motility and  
441 perhaps sending signals to the brain.

### 442 **Microbially derived tryptophan catabolites interact with the host through Trpa1**

443 Trpa1 is a primary nociceptor involved in pain sensation and neuroinflammation. Trpa1 can be  
444 activated by several environmental chemical irritants and inflammatory mediators (Bautista et al.,  
445 2006), however, it is not known if and how Trpa1 might be activated by microbes. Tryptophan is  
446 an essential amino acid that is released in the intestinal lumen by dietary protein digestion or  
447 microbial synthesis. It is well known that gut microbes can catabolize tryptophan to produce a  
448 variety of metabolites, among which indole was the first discovered and often the most abundant  
449 (Smith, 1897). These tryptophan-derived metabolites secreted by gut bacteria can act as  
450 interspecies and interkingdom signaling molecules. Some microbially-derived tryptophan  
451 catabolites including indole and IAld may regulate host immune homeostasis and intestinal barrier  
452 function through ligand binding to the transcription factors, Ahr and Pxr (Venkatesh et al., 2014,  
453 Zelante et al., 2013). Another microbial tryptophan catabolite, tryptamine, activates epithelial 5-  
454 HT<sub>4</sub>R and increases anion-dependent fluid secretion in the proximal mouse colon (Bhattarai et al.,  
455 2018). Though several tryptophan metabolites including IAld can act as AhR agonists (Zelante et  
456 al., 2013), conflicting effects of indole on AhR activation have been reported (Heath-Pagliuso et  
457 al., 1998, Hubbard et al., 2015, Jin et al., 2014). Whether other host receptors can recognize  
458 microbially derived tryptophan catabolites was previously unknown. Here, we present evidence  
459 that bacteria-derived tryptophan catabolites activate Trpa1 in zebrafish, human, and mouse. A  
460 previous study suggested that indole also activates the yeast TRP channel homolog TRPY1 (John  
461 Haynes et al., 2008). This together with our findings point to an ancient role for TRP channels in  
462 microbial metabolite sensing. Our results indicate that intestinal colonization by bacteria that  
463 produce high levels of tryptophan catabolites (e.g., *E. tarda*) leads to detection of those catabolites  
464 by Trpa1+EECs leading to purging of those bacteria by increased intestinal motility. These  
465 discoveries were made possible because *E. tarda*, but none of our tested zebrafish commensals,  
466 exhibited high capacity to produce and secrete tryptophan catabolites in zebrafish water  
467 conditions. Since we did not detect overt pathogenesis in *E. tarda*-treated zebrafish under those  
468 experimental conditions, and since many of the *E. tarda* induced responses were recapitulated  
469 by indole or IAld alone, we speculate that EEC Trpa1 activation and its downstream  
470 consequences reported here are separable from *E. tarda* induced pathogenesis and likely have  
471 broader relevance for host-microbial relationships in the gut.

472 Whereas Trpa1+EECs are abundant in the small intestine of human and rodents (Yang et al.,  
473 2019, Nozawa et al., 2009), previous mouse studies demonstrated that Trpa1 in the colon is  
474 mainly expressed in mesenchymal cells but not in EECs (Yang et al., 2019, Billing et al., 2019).  
475 Conversely to Trpa1+EECs, microbially derived tryptophan metabolites are restricted to the colon  
476 and largely absent in small intestine under normal physiological conditions. This is presumably  
477 due to the small intestine's relatively low microbial density or other aspects of digestive physiology  
478 that limit microbial production of tryptophan metabolites (Kastl et al., 2020). This suggests that  
479 microbially derived tryptophan metabolites do not activate Trpa1+EECs to affect intestinal motility  
480 under normal physiological conditions. On one hand, Trpa1+EECs may act as a reserve host  
481 protective mechanism that detects tryptophan catabolites accumulating due to aberrant  
482 overgrowth of small intestinal microbiota or invasion of specific commensals or pathogens like *E.*  
483 *tarda* that precociously produce those catabolites, and in response increases intestinal motility to  
484 purge that particular community. Loss or impairment of that protective mechanism may result in  
485 overgrowth or dysbiosis of small intestinal microbial communities or an increased risk of enteric  
486 infection. On the other hand, excessive or chronic activation of those Trpa1+EECs may result in  
487 pathophysiological changes. One such scenario may be small intestinal bacteria overgrowth  
488 (SIBO), which is prevalent in patients suffering from diarrhea-dominant irritable bowel syndrome

489 (IBS) (Ghoshal et al., 2017). IBS is a complicated disease that display comorbidities of both  
490 impairment of GI motility and CNS symptoms. The cause of SIBO in IBS is incompletely  
491 understood although several studies demonstrated that some of the indole producing bacteria like  
492 *Escherichia coli* exhibit high abundance in the small intestine of SIBO associated IBS patients  
493 (Ghoshal et al., 2014, Leite et al., 2020, Avelar Rodriguez et al., 2019). Our findings raise the  
494 possibility that SIBO leads to an increase of microbial tryptophan metabolite production in the  
495 small intestine, which then activates Trpa1+EECs to increases intestinal motility and modulate  
496 CNS activity through the vagal nerve, resulting in the complex comorbidities of intestinal and  
497 psychiatric disorders in IBS.

#### 498 **Gut microbiota-EEC-ENS communication**

499 Nerve fibers do not penetrate the gut epithelium therefore, sensation is believed to be a  
500 transepithelial phenomenon as the host senses gut contents through the relay of information from  
501 EECs to the ENS (Gershon, 2004). Using an *in vitro* preparation of mucosa–submucosa,  
502 mechanical or electrical stimulation of mucosa was shown to activate submucosal neuronal  
503 ganglia, an effect blocked by a 5-HT<sub>1</sub>R antagonist (Pan and Gershon, 2000). Consistent with  
504 these previous findings, our zebrafish data suggest a model that 5-HT released from Trpa1+EECs  
505 stimulates intrinsic primary afferent neurons (IPANs) which then activate secondary neurons to  
506 promote intestinal motility through the local enteric EEC-ENS circuitry.

507 90% of 5-HT in the intestine is produced by EC cells, and therefore, EC cell 5-HT secretion was  
508 thought to be important in regulating intestinal motility (Gershon, 2013). This hypothesis, however,  
509 was challenged by recent findings that depletion of EC 5-HT production in *Tph1<sup>-/-</sup>* mice had only  
510 minor effects on gastric emptying, intestinal transit, and colonic motility (Li et al., 2011). Therefore,  
511 the physiological role of EC 5-HT production and secretion remains unclear. Our data suggest  
512 that EEC 5-HT production may be necessary for intestinal motility changes in response to  
513 environmental chemical or microbial stimuli, but not for intestinal motility under normal  
514 physiological conditions. Mice raised germ free displayed lower 5-HT content in the colon,  
515 however no significant difference of 5-HT production was observed in the small intestine  
516 compared to colonized mice (Yano et al., 2015). Whether gut microbiota regulate small intestinal  
517 5-HT secretion and signaling remains unknown. Our data suggest a model in which specific  
518 microbial communities or individual microbial types may stimulate 5-HT secretion from  
519 Trpa1+EECs to modulate small intestinal motility by producing tryptophan catabolites. This may  
520 provide a new mechanism by which gut microbiota can regulate 5-HT signaling in the small  
521 intestine.

522 Gut microbiota are believed to be important for regulating GI motility. Mice raised under germ-  
523 free conditions display longer intestinal transit time and abnormal colonic motility (Vincent et al.,  
524 2018). In humans, the association between gut microbiota and GI motility is also evident,  
525 especially in IBS. IBS patients usually display alterations in GI motility without intestinal  
526 inflammation and many patients with diarrhea-predominant IBS developed their symptoms after  
527 an acute enteric bacterial infection (e.g., post-infectious IBS) and displayed alterations in gut  
528 microbiota composition (Ghoshal and Gwee, 2017). The mechanisms underlying gut microbiota-  
529 induced GI motility and the development of pathological conditions like IBS are unclear. Here, we  
530 provide evidence that a specific set of microbially derived tryptophan catabolites directly stimulate  
531 intestinal motility by activating EEC-ENS signaling via release of 5-HT. Indole, IAld and other  
532 tryptophan catabolites are produced by a wide range of gut bacteria, so we expect our results to  
533 be applicable to commensal and pathogenic bacteria and their host interactions. These findings

534 offer new possibilities for treatment of gut microbiota associated GI disorders, by targeting  
535 microbial tryptophan catabolism pathways, microbial or host degradation of those catabolites, or  
536 targeting EEC microbial sensing and EEC-ENS signaling pathways.

### 537 **Gut microbiota-EEC-CNS communication**

538 The vagus nerve is the primary sensory pathway by which visceral information is transmitted to  
539 the CNS. Recent evidence suggests that the vagus nerve may play a role in communicating gut  
540 microbial information to the brain (Fulling et al., 2019, Breit et al., 2018, Bonaz et al., 2018). For  
541 example, the beneficial effects of *Bifidobacterium longum* and *Lactobacillus rhamnosus* in  
542 neurogenesis and behavior were abolished following vagotomy (Bercik et al., 2011, Bravo et al.,  
543 2011). However, direct evidence for whether and how vagal sensory neurons perceive and  
544 respond to gut bacteria has been lacking. Our results demonstrate that both live *E. tarda* and *E.*  
545 *tarda*-derived tryptophan catabolites activate vagal sensory ganglia through EEC Trpa1 signaling.  
546 Previous findings have shown that EC cells transmit microbial metabolite and chemical irritant  
547 stimuli to pelvic fibers from the spinal cord dorsal root ganglion (Bellono et al., 2017). Our findings  
548 here demonstrate that, in addition to spinal sensory nerves, EEC-vagal signaling is an important  
549 pathway for transmitting specific gut microbial signals to the CNS. The vagal ganglia project  
550 directly onto the hindbrain, and that vagal-hindbrain pathway has key roles in appetite and  
551 metabolic regulation (Grill and Hayes, 2009, Han et al., 2018, Travagli et al., 2006, Berthoud et  
552 al., 2006). Our findings raise the possibility that certain tryptophan catabolites, including indole,  
553 may directly impact these processes as well as emotional behavior and cognitive function (Jaglin  
554 et al., 2018). If so, this pathway could be manipulated to treat gut microbiota-associated  
555 neurological disorders.

### 556 **ACKNOWLEDGEMENTS**

557 This work was supported by NIH R01-DK093399, R01-DK109368, VA-BX002230, and a Pew  
558 Scholars Innovation Award from the Pew Charitable Trusts. S.V.J. and S.-E.J. were supported by  
559 cooperative agreement U01ES030672 of the NIH CounterACT Program. K.D.P. was supported  
560 by R01 GM074057 and R35 HL150713. L.Y. was supported by NIH T32-DK007568. C. D.C. was  
561 supported by NIH F32AT010415. D.J.K. was supported by the Australian Research Council,  
562 DP190103525. The content is solely the responsibility of the authors and does not necessarily  
563 represent the views of the NIH.

### 564 **AUTHOR CONTRIBUTIONS**

565 Conceptualization: L.Y., R.L., J.R.; Formal Analysis: L.Y., S.J., M.B., C.C., C.L.; Funding  
566 acquisition: K.P., D.J., S.-E.J., R.L., J.R.; Investigation: L.Y., S.J., M.B., C.C., D.T., A.M., H.L., J.  
567 C., D.K.; Methodology: L.Y., S.J., M.B., C.C., D.T., A.M., D.K.; Resources: L.Y., J. W., J.T., K.P.;  
568 Supervision: J.C., R.L., J.R.; Visualization: L.Y., S.J., M.B.; Writing – original draft: L.Y.; Writing –  
569 review & editing: L.Y., R.L., J.R., K.P., C.L.

### 570 **DECLARATION OF INTERESTS**

571 The authors declare no competing interests.

### 572 **MAIN FIGURE LEGENDS**

573 **Figure 1. *E. tarda* activates zebrafish EECs *in vivo*.** (A) Experimental approach for measuring  
574 EEC activity in free-swimming zebrafish. (B) Method for recording EEC responses to chemical

575 and microbial stimulants in the EEC-CaMPARI model. (C-D) Confocal projection of mid-intestinal  
576 EECs upon water (C, negative control) or linoleate (D) stimulation in *Tg(neurod1:CaMPARI)*  
577 following UV-photoconversion. (E) Frequency distribution of EECs' red:green CaMPARI  
578 fluorescence intensity ratio in water or linoleate-stimulated zebrafish. n=177 for water group and  
579 n=213 for linoleate group. (F) Percent EEC response in *Tg(neurod1:CaMPARI)* zebrafish. (G-H)  
580 Confocal projection of mid-intestinal EECs upon *Aeromonas* sp. (G) or *E. tarda* (H) stimulation in  
581 *Tg(neurod1:CaMPARI)* following UV-photoconversion. (I) Frequency distribution of EECs'  
582 red:green CaMPARI fluorescence intensity ratio in zebrafish treated with water or *E. tarda*. n=117  
583 for water group and n=156 for *E. tarda* group. (J) Representative heatmap image showing  
584 *Aeromonas* sp., *B. subtilis* and *E. tarda* stimulated EEC red:green CaMPARI fluorescence ratio.  
585 (K) EEC activation in *Tg(neurod1:CaMPARI)* zebrafish stimulated with different bacterial strains.  
586 (L) Representative *Tg(neurod1:Gcamp6f)* zebrafish intestine stimulated with *E. tarda*. One-way  
587 ANOVA with Tukey's post-test was used in F and K. \*p<0.05; \*\*p<0.01; \*\*\*p<0.001; \*\*\*\*p<0.0001.

588 **Figure 2. *E. tarda* activates EECs through *Trpa1*.** (A) Schematic diagram of zebrafish EEC  
589 RNA-seq. (B) Clustering of genes that are significantly enriched in zebrafish EECs and other IECs  
590 ( $P_{adj}<0.05$ ). (C) Comparison of zebrafish and mouse EEC enriched genes. Mouse EEC RNA-seq  
591 data was obtained from GSE114913 (Roberts et al., 2019). (D) Fluorescence image of  
592 *TgBAC(trpa1b:EGFP)*. Zoom-in view shows the expression of *trpa1b+* cells in intestine. (E)  
593 Confocal projection of a *TgBAC(trpa1b:EGFP);Tg(neurod1:TagRFP)* zebrafish intestine. Yellow  
594 arrows indicate zebrafish EECs that are *trpa1b:EGFP+*. (F) Quantification of EEC Gcamp  
595 responses to Trpa1 agonist AITC stimulation in *trpa1b+/+*, *trpa1b+/-* and *trpa1b-/-* zebrafish. (G)  
596 Experimental design. (H-I) Confocal projection of *Tg(neurod1:CaMPARI)* zebrafish intestine  
597 stimulated with *E. tarda* with or without the Trpa1 antagonist HC030031. (J) Quantification of  
598 activated EECs in control and HC030031 treated zebrafish treated with water or *E. tarda*. (K)  
599 Experimental approach. (L-M) Confocal projection of *trpa1b+/+* or *trpa1b-/-* *Tg(neurod1:CaMPARI)*  
600 intestine after stimulation with water or *E. tarda*. (N) Quantification of activated EEC percentage  
601 in WT and *trpa1b-/-* zebrafish treated with water or *E. tarda*. (O) Experimental design. (P-Q) Timed  
602 images of *trpa1b+/+* or *trpa1b-/-* *Tg(neurod1:Gcamp6f)* zebrafish stimulated with *E. tarda*. (R)  
603 Quantification of relative EEC Gcamp6f fluorescence intensity in WT or *trpa1b-/-* zebrafish treated  
604 with *E. tarda*. One-way ANOVA with Tukey's post-test was used in F, J, N. \*p<0.05; \*\*p<0.01;  
605 \*\*\*p<0.001; \*\*\*\*p<0.0001.

606 **Figure 3. Activation of EEC *Trpa1* signaling facilitates enteric *E. tarda* clearance.** (A)  
607 Schematic of zebrafish *E. tarda* treatment. (B-C) Representative image of *trpa1b+/+* or *trpa1b-/-*  
608 zebrafish treated with *E. tarda* expressing mCherry (*E. tarda* mCherry). (D) Quantification of *E.*  
609 *tarda* mCherry fluorescence in *trpa1b+/+* or *trpa1b-/-* zebrafish intestine. (E) Quantification of  
610 intestinal *E. tarda* CFU in *trpa1b+/+* or *trpa1b-/-* zebrafish. (F) Schematic of genetic model in which  
611 EECs are ablated via Cre-induced Diphtheria Toxin (DTA) expression. (G) Representative image  
612 of *Tg(neurod1:cre; cmlc2:EGFP)* and *Tg(neurod1:cre; cmlc2:EGFP); TgBAC(gata5:RSD)* with  
613 EECs that are labelled by *Tg(neurod1:EGFP)*. (H) Quantification of intestinal *E. tarda* CFU in WT  
614 or EEC ablated zebrafish. Student's t-test was used in D, E, H. \*p<0.05; \*\*\*\*p<0.0001.

615 **Figure 4. Activation of EEC *Trpa1* signaling promotes intestinal motility.** (A) Illustration of  
616 EEC *Trpa1* activation using an Optovin-UV platform. (B) Confocal image of *trpa1b+/+* and *trpa1b-/-*  
617 *Tg(neurod1:Gcamp6f)* zebrafish EECs before and after UV activation. (C) Quantification of  
618 EEC Gcamp6f fluorescence changes in *trpa1b+/+* and *trpa1b-/-* zebrafish before and after UV  
619 induction. (D) Representative images of *Tg(neurod1:Gcamp6f)* zebrafish intestine before and

620 after UV-induced Trpa1 activation. Yellow arrowheads indicate the movement of intestinal luminal  
621 contents from anterior to posterior following EEC activation. (E) PIV-Lab velocity analysis to  
622 quantify intestinal motility in WT and EEC ablated zebrafish. Spatiotemporal heatmap series  
623 represent the  $\mu$  velocity of the imaged intestinal segment at the indicated timepoint post Trpa1  
624 activation. (F) Quantification of the mean intestinal velocity magnitude before and after UV  
625 activation in WT and EEC ablated zebrafish. (G) Model of light activation of ChR2 in EECs. (H)  
626 Fluorescence image of *Tg(neurod1:Gal4); Tg(UAS:ChR2-mCherry)* zebrafish that express ChR2  
627 in EECs. (I) Confocal image of ChR2 expressing EECs in *Tg(neurod1:Gcamp6f)* intestine before  
628 and after blue light-induced ChR2 activation. (J) Quantification of EEC Gcamp fluorescence  
629 intensity before and after blue light-induced ChR2 activation. (K) Intestinal velocity magnitude  
630 before and after blue-light induced activation in ChR2+Trpa1+ EECs. (L) Mean velocity magnitude  
631 before and after blue light-induced activation in ChR2+Trpa1+ EECs. (M) Experimental design  
632 schematic for panels N and O. (N) Heatmap representing the  $\mu$  velocity of the imaged intestinal  
633 segment at indicated timepoints following *Aeromonas* sp. or *E. tarda* gavage. (O) Mean intestinal  
634 velocity magnitude in zebrafish without gavage or gavaged with PBS or different bacterial strains.  
635 Student's t-test was used in O. \*\*\*\* $p < 0.0001$ .

636 **Figure 5. Activation of EEC Trpa1 signaling activates enteric cholinergic neurons and**  
637 **promotes intestinal motility through 5-HT.** (A) Working model showing Trpa1 stimulation in  
638 EECs activates enteric neurons. (B) Confocal image of *ret+/?* (*ret+/+* or *ret+/-*) and *ret-/-* intestine  
639 in *TgBAC(neurod1:EGFP); Tg(NBT:DsRed)* zebrafish. *neurod1* labelled EECs shown in green  
640 and *NBT* labelled ENS shown in magenta. (C) Quantification of mean intestinal velocity magnitude  
641 before and after EEC Trpa1 activation in *ret+/?* zebrafish. (D) Quantification of mean intestinal  
642 velocity magnitude before and after UV activation in *ret-/-* zebrafish. (E) Confocal image of  
643 intestine in *TgBAC(chata:Gal4); Tg(UAS:NTR-mCherry); Tg(neurod1:LifeAct-EGFP)* zebrafish.  
644 Cholinergic enteric neurons are shown in magenta and *neurod1+* EECs are shown in green. The  
645 asterisks indicate Cholinergic enteric neuron cell bodies which reside on the intestinal wall. (F)  
646 Higher magnification view indicates the EECs (green) directly contact nerve fibers that are  
647 extended from the *chata+* enteric neuron cell body (magenta). Yellow arrows indicate the points  
648 where EECs form direct connections with *chata+* ENS. (G) Confocal image of intestine in  
649 *TgBAC(chata:Gal4); Tg(UAS:NTR-mCherry); TgBAC(trpa1b:EGFP)* zebrafish. (H) Trpa1+EECs  
650 (green) form direct contact with *chata+* enteric neurons (magenta). (I) Live imaging of  
651 *TgBAC(chata:Gal4); Tg(UAS:Gcamp6s); Tg(NBT:DsRed)* zebrafish intestine. All the enteric  
652 neurons are labelled as magenta by *NBT:DsRed*. Yellow arrow indicates a *chata+* enteric neuron.  
653 (J) Higher magnification view of a *Gcamp6s* expressing *chata+* enteric neuron. (K) *In vivo* calcium  
654 imaging of *chata+* enteric neuron before and after EEC Trpa1 activation. (L) Quantification of  
655 *chata+* enteric motor neuron *Gcamp6s* fluorescence intensity before and after EEC Trpa1  
656 activation. (M) Confocal image of *TgBAC(trpa1b:EGFP)* zebrafish intestine stained for 5-HT.  
657 Yellow arrows indicate the presence of 5-HT in the basal area of *trpa1b+* EECs. (N) Confocal  
658 image of *TgBAC(trpa1b:EGFP); Tg(tph1b:mCherry-NTR)* zebrafish intestine. Yellow arrow  
659 indicates the *trpa1b+* EECs that express Tph1b. (O) Quantification of intestinal motility changes  
660 in response to EEC Trpa1 activation in *tph1b+/-* and *tph1b-/-* zebrafish. Student's t test was used  
661 in O. \*\* $p < 0.01$

662 **Figure 6. EEC Trpa1 signaling activates vagal sensory ganglia.** (A) Working model. (B)  
663 Confocal image of zebrafish vagal sensory ganglia labelled with *Tg(neurod1:EGFP)* (green) and  
664 acetylated  $\alpha$ Tubulin antibody staining (AC- $\alpha$ Tub, magenta). (C) Lightsheet projection of zebrafish  
665 stained acetylated  $\alpha$ Tubulin antibody. Yellow arrow indicates vagal nerve innervation to the

666 intestine. (D) *neurod1:EGFP+* EECs (green) directly contact vagal sensory nerve fibers labelled  
667 with  $\alpha$ Tubulin (white). (E) Confocal image of the vagal sensory nucleus in zebrafish larvae  
668 hindbrain where - vagal sensory neuron project. Vagal sensory nerve fibers are labeled with  
669 different fluorophores through Cre-brainbow recombination in *Tg(neurod1:cre);*  
670 *Tg( $\beta$ act2:Brainbow)* zebrafish. The 3D zebrafish brain image is generated using mapzebrain  
671 (Kunst et al., 2019). (F) Confocal image of vagal sensory ganglia in *Tg(neurod1:cre);*  
672 *Tg( $\beta$ act2:Brainbow)* zebrafish. Asterisk indicates posterior lateral line afferent nerve fibers. Blue  
673 arrowheads indicate three branches from vagal sensory ganglia that project to the hindbrain. (G)  
674 Confocal image demonstrates the EEC-vagal network in *Tg(isl1:EGFP); Tg(neurod1:TagRFP)*  
675 zebrafish intestine. EECs are labeled as magenta by *neurod1:TagRFP* and the vagus nerve is  
676 labeled green by *isl1:EGFP*. (H) EECs (*neurod1+*; magenta) directly contact vagal nerve fibers  
677 (*isl1+*; green). Yellow arrows indicate the points where EECs form direct connections with vagal  
678 nerve fibers. (I-J) *In vivo* calcium imaging of vagal sensory ganglia in *Tg(neurod1:Gcamp6f);*  
679 *Tg(NBT:DsRed)* zebrafish gavaged with PBS (I) or *E. tarda* (J). (K) Quantification of individual  
680 vagal sensory neuron Gcamp6f fluorescence intensity in *E. tarda* or PBS gavaged zebrafish. (L-  
681 N) Confocal image of vagal ganglia stained with p-ERK antibody in WT or EEC ablated zebrafish  
682 gavaged with PBS or Trpa1 agonist AITC. The vagal sensory ganglia expressing *neurod1:EGFP*  
683 are labeled green and activated vagal sensory neurons are labeled magenta by p-ERK antibody  
684 staining. (O-Q) Confocal projection of vagal ganglia stained with p-ERK antibody in WT or EEC  
685 ablated zebrafish gavaged with PBS or *E. tarda*. (R) Quantification of p-ERK+ vagal sensory  
686 neurons in WT or EEC ablated zebrafish following PBS or AITC gavage. (S) Quantification of p-  
687 ERK+ vagal sensory neurons in WT or EEC ablated zebrafish following PBS or *E. tarda* gavage.  
688 (T) Quantification of p-ERK+ vagal sensory neurons in WT or *trpa1b/-* zebrafish following *E. tarda*  
689 gavage. One-way ANOVA with Tukey's post test was used in R and S and Student's t-test was  
690 used in T. \* $p < 0.05$ ; \*\* $p < 0.01$ ; \*\*\* $p < 0.001$ ; \*\*\*\* $p < 0.0001$ .

691 **Figure 7. *E. tarda* derived Tryptophan catabolites activate Trpa1 and the EEC-vagal**  
692 **pathway.** (A) Method for preparing different fractions from *E. tarda* GZM (zebrafish water) culture.  
693 (B) Activated EECs in *Tg(neurod1:CaMPARI)* zebrafish stimulated by different *E. tarda* fractions.  
694 (C) Activated EECs in *trpa1b+/+* and *trpa1b/-* *Tg(neurod1:CaMPARI)* zebrafish stimulated with  
695 *E. tarda* CFS. (D) Screening of supernatants of *E. tarda* in GZM culture medium by HPLC-MS.  
696 Samples were collected at 0, 1, 6, 24 h. Abbreviations are as follows: IAld, indole-3-  
697 carboxaldehyde; and IET, tryptophol. Extracted ions were selected for IAld (m/z 145), IET, (m/z  
698 161), and Indole (m/z 117). (E) Chemical profiles of Trp-Indole derivatives from supernatants of  
699 various commensal bacteria in GZM medium for 1 day of cultivation. Values present normalized  
700 production of Trp-Indole derivatives based on CFU. (F) *Tg(neurod1:Gcamp6f)* zebrafish  
701 stimulated by Indole or IAld. Activated EECs in the intestine are labelled with white arrows. (G)  
702 Quantification of EEC Gcamp activity in *trpa1b+/+* and *trpa1b/-* *Tg(neurod1:Gcamp6f)* zebrafish  
703 stimulated with Indole or IAld. (H) Schematic of experimental design to test effects of indole and  
704 IAld on human or mouse Trpa1. (I) Dose-response analysis of the integrated Calcium 6  
705 fluorescence response above baseline (Fmax-F0; maximal change in Ca<sup>2+</sup> influx) as a function of  
706 indole and IAld concentration in human TRPA1 expressing HEK-293T cells. (EC<sub>50</sub> = 88.7  $\mu$ M,  
707 68.2-114.7  $\mu$ M 95% CI for indole; and, EC<sub>50</sub> = 77.7  $\mu$ M, 66.8-91.8  $\mu$ M 95% CI for IAld).  
708 Concentration-response data were normalized to 1 mM cinnamaldehyde (CAD), a known TRPA1  
709 agonist. Data represent the mean of 3-4 experiments, each performed with 3-4 replicates. (J)  
710 Dose-response analysis of A967079 inhibition of Indole and IAld induced Ca<sup>2+</sup> influx. (IC<sub>50</sub> = 149.6  
711 nM, 131.3-170.8 nM 95% CI for Indole; and, IC<sub>50</sub> = 158.1 nM, 135.4 – 185.6  $\mu$ M 95% CI for IAld).



712 Concentration-response data of A967079 inhibition was normalized to response elicited by 100  
713  $\mu$ M agonist (Indole or IAld). (K-N) *In vivo* calcium imaging of vagal sensory ganglia in WT or EEC  
714 ablated *Tg(neurod1:Gcamp6f)*; *Tg(neurod1:TagRFP)* zebrafish gavaged with PBS, Indole or IAld.  
715 (O) Quantification of individual vagal sensory ganglia cell Gcamp6f fluorescence intensity in WT  
716 or EEC ablated zebrafish gavaged with PBS or Indole. (P) Schematic of amperometric  
717 measurements to examine the effects of on indole 5-HT secretion in mouse and human small  
718 intestinal tissue. (Q) Indole caused a significant increase in 5-HT secretion in mouse duodenum;  
719 however, no such effects were observed in the presence of Trpa1 antagonist HC030031. (R)  
720 Indole caused a significant increase in 5-HT secretion in human ileum; however, no such effects  
721 were observed in the presence of Trpa1 antagonist HC030031. Data in B, C, G, Q, R were  
722 presented as mean  $\pm$  SD. One-way ANOVA with Tukey's post test was used in B and  
723 Q, Student's t-test was used in C, H and paired one-way ANOVA with Tukey's post test was used  
724 in P-R. \* $p < 0.05$ ; \*\* $p < 0.01$ ; \*\*\* $p < 0.001$ ; \*\*\*\* $p < 0.0001$ .

## 725 **STAR METHODS**

### 726 **Resource Availability**

#### 727 **Lead Contact**

728 Further information and requests for resources and reagents should be directed to and will be  
729 fulfilled by the Lead Contact, John F. Rawls ([john.rawls@duke.edu](mailto:john.rawls@duke.edu)).

#### 730 **Materials Availability**

731 Zebrafish strains and plasmids generated in this study are available upon request from the Lead  
732 Contact.

#### 733 **Data and Code Availability**

734 Sequencing reads generated as part of this study are available at Gene Expression Omnibus  
735 accession GSE151711.

#### 736 **Experimental Model and Subject Details**

##### 737 **Zebrafish strains and husbandry**

738 All zebrafish experiments conformed to the US Public Health Service Policy on Humane Care and  
739 Use of Laboratory Animals, using protocol numbers A115-16-05 and A096-19-04 approved by  
740 the Institutional Animal Care and Use Committee of Duke University. For experiments involving  
741 conventionally raised zebrafish larvae, adults were bred naturally in system water and fertilized  
742 eggs were transferred to 100mm petri dishes containing ~25 mL of egg water at approximately 6  
743 hours post-fertilization. The resulting larvae were raised under a 14 h light/10 h dark cycle in an  
744 air incubator at 28°C at a density of 2 larvae/mL water. All the experiments performed in this study  
745 ended at 6 dpf unless specifically indicated. The strains used in this study are listed in Key  
746 Resources Table. All lines were maintained on a mixed Ekkwill (EKW) background.

##### 747 **Bacterial strains and growing conditions**

748 All bacterial strains in this study were cultured at 30°C in Trypticase soy broth (TSB) or Gnotobiotic  
749 zebrafish medium (GZM) (Pham et al., 2008). Tryptic Soy Agar (TSA) plate was used for streaking  
750 bacterial from glycerol stock or performing colony forming unit (CFU) experiments. The antibiotic

751 carbenicillin was used to select *E. tarda* LSE that express mCherry at the working concentration  
752 of 100 µg/mL.

## 753 Method Details

### 754 Generating transgenic zebrafish

755 The Gateway Tol2 cloning approach was used to generate the *neurod1:CaMPARI* and  
756 *neurod1:cre* plasmids (Kawakami, 2007, Kwan et al., 2007). The 5kb pDONR-neurod1 P5E  
757 promoter was previously reported (McGraw et al., 2012) and generously provided by Dr. Hillary  
758 McGraw. The pME-cre plasmid as reported previously (Cronan et al., 2016) was generously  
759 donated by Dr. Mark Cronan. The pcDNA3-CaMPARI plasmid was reported previously (Fosque  
760 et al., 2015) and obtained from Addgene. The CaMPARI gene was cloned into pDONR-221  
761 plasmid using BP clonase (Invitrogen, 11789-020) to generate PME-CaMPARI. pDONR-neurod1  
762 P5E and PME-CaMPARI were cloned into pDestTol2pA2 using LR Clonase  
763 (ThermoFisher,11791). Similarly, pDONR-neurod1 P5E and pME-cre were cloned into  
764 pDestTol2CG2 containing a *cmlc2:EGFP* marker. The final plasmid was sequenced and injected  
765 into the wild-type EKW zebrafish strain and the F2 generation of alleles  
766 *Tg(neurod1:CaMPARI)<sup>du78</sup>* and *Tg(neurod1:cre; cmlc2:EGFP)<sup>du79</sup>* were used for this study.

767 To make transgenic lines, that permit specific EEC ablation, we used *Tg(neurod1:cre)* and  
768 *TgBAC(gata5:loxP-mCherry-stop-loxP-DTA)* new transgenic system. This system consists of two  
769 new transgene alleles - one expressing Cre recombinase from the *neurod1* promoter (in EECs,  
770 CNS, and islets) and a second expressing the diphtheria toxin (DTA) in *gata5+* cells (in EECs,  
771 other IECs, heart, and perhaps other cell types) only in the presence of Cre (Fig. 3F). As the only  
772 cells known to co-express *neurod1* and *gata5* in the zebrafish larvae, EECs are ablated whereas  
773 non-EEC cell populations, including islets and the CNS, remain unaffected (Fig. 3G). A small  
774 percentage of EECs remained in the distal intestine presumably due to the low level of *gata5*  
775 expression in that region (Fig. S4C). The method for generating *Tg(neurod1:cre)* was described  
776 above. To generate the *TgBAC(gata5:loxP-mCherry-stop-loxP-DTA)* transgenic line, the  
777 translational start codon of *gata5* in the BAC clone DKEYP-73A2 was replaced with the loxP-  
778 mCherry-STOP-loxP-DTA (RSD) cassette by Red/ET recombineering technology (GeneBridges).  
779 For recombination with arms flanking the RSD cassette, the 5' homologous arm used was a 716  
780 bp fragment upstream of the start codon and the 3' homologous arm was a 517 bp downstream  
781 fragment. The vector-derived loxP site was replaced with an I-SceI site using the same technology.  
782 The final BAC was purified using the Qiagen Midiprep kit, and coinjected with I-SceI into one-cell  
783 stage zebrafish embryos. The full name of this transgenic line is *Tg(gata5:loxP-mCherry-STOP-*  
784 *loxP-DTA)<sup>pd315</sup>*.

785 *Tg(tph1b:mCherry-NTR)<sup>pd275</sup>* zebrafish were generated using I-SceI transgenesis in an Ekkwill  
786 (EK) background. Golden Gate Cloning with Bsal-HF restriction enzyme (NEB) and T4 DNA  
787 ligase (NEB) was used to generate the *tph1b:mCherry-NTR* plasmid by cloning the 5kb *tph1b*  
788 promoter sequence (*tph1bP* GG F: GGTCTCGATCGGctcaaggtgaatctgtcacattc; *tph1bP* GG R:  
789 GGTCTCGGCTACggtatggtctctgttttatag), mCherry (mC GG F: GGTCTCGTAGCC  
790 gccgccaccatggtgag; mC GG2 R: GGTCTCGGTACCctgtacagctcgtccatgccgcc), a P2A  
791 polycistronic sequence and triple mutant variant nitroreductase (Mathias et al., 2014) (mutNTR  
792 GG F: GGTCTCGGTACCtactgtacaaggggaagcggagc; mutNTR GG2 R: GGTCTCCCATGC  
793 caggatcggtcgtgctcga), into a pENT7 vector backbone with a poly-A tail and I-SceI sites (pENT7  
794 mCN GG F: GGTCTCGCATGGacacctccccctgaacctg; pENT7 mCN GG R: GGTCTCCCGATC



840 preparation and sequencing was performed at the GCB Sequencing and Genomic Technologies  
841 Shared Resource.

842 Zebrafish RNA-seq reads were mapped to the danRer10 genome using HISAT2(Galaxy Version  
843 2.0.5.1) using default settings. Normalized counts and pairwise differentiation analysis were  
844 carried out via DESeq2 (Love et al., 2014) with the web based-galaxy platform:  
845 <https://usegalaxy.org/>. For the purpose of this study, we only displayed the CV EEC (n=3) and CV  
846 IEC (n=3) comparison and analysis in the Results section. The default significance threshold of  
847  $FDR < 5\%$  was used for comparison. Hierarchical clustering of replicates and a gene expression  
848 heat map of RNA-seq data were generated using the online expression heatmap tool:  
849 <http://heatmapper.ca/expression/>. The human and mouse RNA-seq raw counts data were  
850 obtained from the NCBI GEO repository: human, GSE114853; mouse, GSE114913 (Roberts et  
851 al., 2019). Pairwise differentiation analysis of human jejunum CHGA+ (n=11) and CHGA- (n=11)  
852 and mouse duodenum Neurod1+ (n=3) and Neurod1- (n=3) was performed using DESeq2. The  
853 mouse and zebrafish ortholog Gene ID conversion was downloaded from Ensemble. The genes  
854 that were significantly enriched ( $P_{FDR} < 0.05$ ) in the human and mouse EEC data sets were used  
855 to query the zebrafish EEC RNA seq dataset and data were plotted using Graphpad Prism7.  
856 RNA-seq data generated in this study can be accessed under Gene Expression Omnibus  
857 accession GSE151711.

### 858 **Recording *in vivo* EEC activity**

859 CaMPARI undergoes permanent green-to-red photoconversion (PC) under 405 nm light when  
860 calcium is present. This permanent conversion records the calcium activity for all areas  
861 illuminated by PC-light. Red fluorescence intensity correlates with calcium activity during  
862 photoconversion (Fosque et al., 2015). In the *Tg(neurod1:CaMPARI)* zebrafish line, the CaMPARI  
863 (calcium-modulated photoactivatable ratiometric integrator) transgene is expressed under control  
864 of the -5kb promoter cloned from the zebrafish *neurod1* locus. CaMPARI mRNA is transcribed  
865 and the CaMPARI protein is expressed in cells that are able to activate the *neurod1* promoter.  
866 There are multiple cell types in the zebrafish body that are sufficient to activate the *neurod1*  
867 promoter, including all EECs in the intestine (Ye et al., 2019). CaMPARI protein is a calcium  
868 indicator protein that binds calcium and converts from green fluorescence to red fluorescence in  
869 the presence of UV light. This protein is engineered and described in detail in a previous  
870 publication (Fosque et al., 2015). We use this transgenic model to measure the level of  
871 intracellular calcium in EECs. Similar to neurons, it is well known that when extracellular  
872 stimulants act on various receptors on EECs, this leads to an increase of intracellular calcium  
873 either due to calcium influx through calcium channels in the plasma membrane or release of  
874 calcium stored in the ER. Through either of these pathways, increased intracellular calcium then  
875 directly triggers EECs to release hormone/neurotransmitter vesicles. To record *in vivo* EEC  
876 activity using the CaMPARI platform, conventionally raised *Tg(neurod1:CaMPARI)* zebrafish  
877 larvae were sorted at 3 dpf and maintained in Gnotobiotic Zebrafish Media (GZM) (Pham et al.,  
878 2008) with 1 larvae/mL density. At 6 dpf, for each experimental group, ~20 larvae were transferred  
879 into 50mL conical tubes in 2 mL GZM medium. The larvae were adjusted to the new environment  
880 for 30 mins before stimuli were added to each conical tube. For nutrient stimulation, since linoleate,  
881 oleate and laurate are not soluble in water, a bovine serum albumin (BSA) conjugated fatty acid  
882 solution was generated as described previously (Ye et al., 2019). 2 mL linoleate, oleate, laurate,  
883 butyrate or glucose was added to the testing tube containing ~20 zebrafish larvae in 3 mL GZM.  
884 The final stimulant concentrations were: linoleate (1.66 mM), oleate oleate (1.66 mM), laurate

885 (1.66 mM), butyrate (2 mM) and glucose (500 mM). Zebrafish larvae were stimulated for 2 mins  
886 (fatty acids) or 5 mins (glucose) before the UV pulse. For bacterial stimulation, single colonies of  
887 the different bacterial strains were cultured aerobically in tryptic soy broth (TSB) at 30°C overnight  
888 (rotating 50-60 rpm, Thermo Fisher Tissue Culture Rotator CEL-GRO #1640Q)(see strains listed  
889 in Key Resources Table). O/N TSB cultured bacteria were harvested, washed with GZM and  
890 resuspended in 2 mL GZM. 2 mL bacteria were then added to a test tube containing ~20 zebrafish  
891 larvae in 3 mL GZM. The final concentration of the bacterial is  $\sim 10^8$  CFU/ml. Zebrafish were then  
892 stimulated for 20mins before treated with a UV pulse. A customized LED light source (400 nm-  
893 405 nm, Hongke Lighting CO. LTD) was used to deliver a UV light pulse (100 W power, DC32-34  
894 V and 3500 mA) for 30 seconds. Following the UV pulse, zebrafish larvae were transferred to 6-  
895 well plates. To block spontaneous intestinal motility and facilitate *in vivo* imaging, zebrafish larvae  
896 were incubated in 20  $\mu$ M 4-DAMP (mAChR blocker), 10  $\mu$ M atropine (mAChR blocker) and 20  $\mu$ M  
897 clozapine (5-HTR blocker) for 30 mins. Zebrafish larvae were then anesthetized with Tricaine  
898 (1.64 mg/ml) and mounted in 1% low melting agarose and imaged using a 780 Zeiss upright  
899 confocal microscope in the Duke Light Microscope Core Facility. Z-stack confocal images were  
900 taken of the mid-intestinal region in individual zebrafish. The laser intensity and gain were set to  
901 be consistent across different experimental groups. The resulting images were then processed  
902 and analyzed using FIJI software (Schindelin et al., 2012). To quantify the number of activated  
903 EECs, the color threshold was set for the CaMPARI red channel. EECs surpassing the color  
904 threshold were counted as activated EECs. The CaMPARI green channel was used to quantify  
905 the total number of EECs in each sample. The ratio of activated EECs to the total EEC number  
906 was calculated as the percentage of activated EECs. As reported in Fig. S1A-F, in  
907 *Tg(neurod1:CaMPARI)* zebrafish model, in addition to EECs, CaMPARI is also expressed in other  
908 *neurod1+* cells including CNS and pancreatic islet. Therefore, the *Tg(neurod1:CaMPARI)* model  
909 can also be used to measure the activity of the CNS and pancreatic islet. However, the method  
910 we described above permit us to specifically analyze EEC signal through restricting our image  
911 inquiry in the middle intestine, a region in which only EECs express CaMPARI.

912 To record *in vivo* EEC activity using the *Tg(neurod1:Gcamp6f)* system, we used our published  
913 protocol with slight modification (Ye et al., 2019). In brief, unanesthetized zebrafish larvae were  
914 gently mounted in 3% methylcellulose. Excess water was removed and zebrafish larvae were  
915 gently positioned with right side up. Zebrafish were then moved onto an upright Leica M205 FA  
916 fluorescence stereomicroscope equipped with a Leica DFC 365FX camera. The zebrafish larvae  
917 were allowed to recover for 2mins before 100  $\mu$ L of test agent was pipetted directly in front of the  
918 mouth region. Images were then recorded every 10 seconds. The stimulants used in this study  
919 are listed in Supplemental Table 1. The data shown in Fig. 2O-R, depicting the EEC responses  
920 to *E. tarda* stimulation, were obtained by mounting unanesthetized zebrafish larvae in 1% low  
921 melting agarose. A window (5  $\times$  5 mm) was cut to expose the head region of the zebrafish. 10  $\mu$ L  
922 of *E. tarda* culture [ $\sim 10^9$  Colony Forming Unit (CFU)] were delivered at the zebrafish mouth area.  
923 Images were recorded every 10 secs for 20 mins. Image processing and analysis were performed  
924 using FIJI software. Time-lapse fluorescence images were first aligned to correct for experimental  
925 drift using the plugin “align slices in stack.” Normalized correlation coefficient matching and  
926 bilinear interpolation methods for subpixel translation were used for aligning slices (Tseng et al.,  
927 2012). The plugin “rolling ball background subtraction” with the rolling ball radius=10 pixels was  
928 used to remove the large spatial variation of background intensities. The Gcamp6f fluorescence  
929 intensity in the intestinal region was then calculated for each time point. The ratio of maximum

930 fluorescence (F<sub>max</sub>) and the initial fluorescence (F<sub>0</sub>) was used to measure EEC calcium  
931 responses.

### 932 **Immunofluorescence staining and imaging**

933 Whole mount immunofluorescence staining was performed as previously described (Ye et al.,  
934 2019). In brief, ice cold 2.5% formalin was used to fix zebrafish larvae overnight at 4°C. The  
935 samples were then washed with PT solution (PBS+0.75%Triton-100). The skin and remaining  
936 yolk were then removed using forceps under a dissecting microscope. The deyolked samples  
937 were then permeabilized with methanol for more than 2 hrs at -20°C. Samples were then blocked  
938 with 4% BSA at room temperature for more than 1 hr. The primary antibody was diluted in PT  
939 solution and incubated at 4°C for more than 24 hrs. Following primary antibody incubation, the  
940 samples were washed with PT solution and incubated overnight with secondary antibody with  
941 Hoechst 33342 for DNA staining. Imaging was performed with Zeiss 780 inverted confocal and  
942 Zeiss 710 inverted confocal microscopes with 40× oil lens. The primary antibodies were listed in  
943 Supplemental Table 1. The secondary antibodies in this study were from Alexa Fluor Invitrogen  
944 were used at a dilution of 1:250.

945 To quantify vagal activity by pERK staining, we used a published protocol with slight modification  
946 (Randlett et al., 2015). Zebrafish larvae were quickly collected by funneling through a 0.75 mm  
947 cell strainer and dropped into a 5mL petri dish containing ice cold fix buffer (2.5% formalin+ 0.25%  
948 Triton 100). Larvae were fixed overnight at 4°C, then washed 3 times in PT (PBS+ 0.3% Triton  
949 100), treated with 150 mM Tris-HCl (PH=9) for 15 mins at 70°C, washed with PT and digested  
950 with 0.05% trypsin-EDTA on ice for 45 mins. Following digestion, samples were then washed with  
951 PT and transferred into block solution [PT + 1% bovine serum albumin (BSA, Fisher) + 2% normal  
952 goat serum (NGS, Sigma) + 1% dimethyl sulfoxide (DMSO)]. The primary antibodies [pERK (Cell  
953 signaling); tERK (Cell signaling); GFP (Aves Lab)] were diluted in block solution (1:150 for pERK;  
954 1:150 for tERK and 1:500 for GFP) and samples were incubated in 100 µl of primary antibody  
955 overnight at 4°C. Following primary antibody incubation, samples were then washed with PT and  
956 incubated with secondary antibody overnight at 4°C. Samples were then washed with PBS,  
957 mounted in 1% LMA and imaged using a Zeiss 780 upright confocal microscope.

### 958 **Zebrafish *E. tarda* colonization**

959 For *E. tarda* colonization experiments, fertilized zebrafish eggs were collected, sorted and  
960 transferred into a cell culture flask containing 80 mL GZM at 0 dpf. At 3 dpf, dead embryos and  
961 60 mL GZM were removed and replaced with 50 mL fresh GZM in each flask. To facilitate  
962 consistent commensal gut bacterial colonization, an additional 10 mL of filtered system water (5  
963 µm filter, SLSV025LS, Millipore) were added to each flask. Overnight *E. tarda* mCherry (Amp<sup>r</sup>,  
964 see details in Supplemental Table 1) culture was harvested, washed three times with GZM. 150  
965 µL of GZM-washed *E. tarda* mCherry culture were inoculated into each flask. The *E. tarda*  
966 concentration is ~10<sup>6</sup> CFU/ml. Daily water changes (60 ml) was performed and 200 µL autoclaved  
967 solution of ZM000 food (ZM Ltd.) was added from 3 dpf to 6 dpf as previously described (Pham  
968 et al., 2008). At 6 dpf, zebrafish larvae were subjected to fluorescence imaging analysis or CFU  
969 quantification. For fluorescence imaging analysis, zebrafish larvae were anesthetized with  
970 Tricaine (1.64 mg/ml), mounted in 3% methylcellulose and imaged with a Leica M205 FA upright  
971 fluorescence stereomicroscope equipped with a Leica DFC 365FX camera. For CFU  
972 quantification, digestive tracts were dissected and transferred into 1 mL sterile PBS which was  
973 then mechanically disassociated using a Tissue-Tearor (BioSpec Products, 985370). 100 µL of

974 serially diluted solution was then spread on a Tryptic soy agar (TSA) plate with Carbenicillin (100  
975  $\mu\text{g}/\text{ml}$ ) and cultured overnight at  $30^\circ\text{C}$  under aerobic conditions. The mCherry+ colonies were  
976 quantified from each plate and *E. tarda* colony forming units (CFUs) per fish were calculated.

### 977 **Zebrafish microgavage and chemical treatment**

978 For delivering bacterial or chemicals specifically to the intestine, we adopted our established  
979 microgavage technique (Cocchiaro and Rawls, 2013). Zebrafish were anesthetized with 1 mg/mL  
980  $\alpha$ -Bungarotoxin ( $\alpha$ -BTX) and the gavage procedure was performed as previously described using  
981 microinjection station (Cocchiaro and Rawls, 2013). For bacteria gavage experiments, 1ml of  
982 overnight bacterial culture was harvested, pelleted, washed with PBS and resuspended in 100ul  
983 PBS.  $\sim 8\text{nl}$  was then delivered into the zebrafish intestine using microgavage. The gavaged  
984 zebrafish was then transferred into egg water and mounted in 1% LMA for imaging. For chemical  
985 gavage experiments,  $\sim 8\text{nl}$  of AITC (100mM), indole (1mM) and IAId (1mM) was gavaged into the  
986 intestine.

987 For Trpa1 inhibition, Trpa1 antagonist HC030031 (280 $\mu\text{M}$ ) was treated 2 hours before and during  
988 the 30 mins of *E. tarda* stimulation. For AhR inhibition, two AhR inhibitors, CH030031 and folic  
989 acid, were selected based on previous publications (Puyskens et al., 2020, Kim et al., 2020).  
990 CH030031 is a well-established specific AhR inhibitor (Choi et al., 2012). Whereas folic acid is  
991 shown to act as a competitive AhR antagonist at the concentration as low as 10ng/ml (Kim et al.,  
992 2020). For the *E. tarda* treatment experiment, DMSO, CH030031 (1 $\mu\text{M}$ ) or folic acid (10 $\mu\text{M}$ ) was  
993 added into zebrafish water at 3 dpf zebrafish at the same time as *E. tarda* administration. The  
994 AhR inhibitors were replenished during daily water changes, and zebrafish were analyzed at 6  
995 dpf. For the Optovin-UV experiment, overnight Optovin treated zebrafish were treated for 2 hours  
996 with DMSO, CH030031 (10 $\mu\text{M}$ ) or folic acid (10 $\mu\text{M}$ ). As demonstrated by previous study, 2-hour  
997 10 $\mu\text{M}$  and 3-day 0.5 $\mu\text{M}$  CH030031 treatment is sufficient to inhibit larve zebrafish AhR signaling  
998 (Puyskens et al., 2020, Sun et al., 2019b, Yue et al., 2017). The concentration of FA was chosen  
999 based on zebrafish tolerance and a previous study shown the treatment of early zebrafish  
1000 embryos with 0.05 $\mu\text{M}$  FA inhibits AhR signaling (Yue et al., 2017).

### 1001 **Optic EEC activation**

1002 For EEC Trpa1 activation using the Optovin platform, zebrafish larvae were treated with 10  $\mu\text{M}$   
1003 Optovin overnight. Following Optovin treatment, unanesthetized zebrafish were mounted in 1%  
1004 LMA and imaged under a 780 upright Zeiss confocal microscope using 20 $\times$  water objective lenses.  
1005 For all the experiments, the mid-intestine region was imaged (Fig. S5D). The intestinal epithelium  
1006 was selected as the region of interest (ROI) (Fig. S5A). Serial images were obtained at 1 s/frame.  
1007 A 405 nm pulse of light was applied to the ROI at 1 pulse/10s. For some experiments (Fig. 4D-F,  
1008 Fig. S5B-G), the images were obtained at 10s/frame. When measuring Optovin effects on  
1009 intestinal motility in *ret*<sup>-/-</sup>, *sox10*<sup>-/-</sup> or *tph1b*<sup>-/-</sup> zebrafish larvae, embryos were collected from  
1010 heterozygous zebrafish. *ret*<sup>-/-</sup> zebrafish were identified by lack of ENS and deflated swim bladder  
1011 (Knight et al., 2011), *sox10*<sup>-/-</sup> zebrafish were identified by lack of pigment (Rolig et al., 2017), and  
1012 *tph1b*<sup>-/-</sup> zebrafish were identified by PCR-based genotyping (Tornini et al., 2017).

1013 Photoactivation of channelrhodopsin (ChR2) in EECs was performed in *Tg(neurod1:Gal4,*  
1014 *cmlc2;EGFP); Tg(UAS:ChR2-mCherry)* transgenic zebrafish. In this model, ChR2 expression in  
1015 EECs is mosaic. At 6 dpf, unanesthetized zebrafish larvae were mounted in 1% LMA.  
1016 Photoactivation and imaging were performed with a Zeiss 780 upright confocal using 20 $\times$  water  
1017 objective lenses. Individual ChR2+ EECs were selected as ROI (Fig. S5H, I). Serial images were

1018 obtained at 1 s/frame. The 488 nm and 458 nm pulses were applied to the selected ROI at 1  
1019 pulse/s. For selectively activating *trpa1b+* or *trpa1b-* ChR2 expressing EECs, *Tg(neurod1:Gal4,*  
1020 *cmlc2;EGFP); Tg(UAS:ChR2-mCherry)* was crossed with *TgBAC(trpa1b:EGFP)*. In each  
1021 zebrafish, either *Trpa1+ChR2+* EEC or *Trpa1-ChR+* EEC was selected to activate and examine  
1022 the motility pre and post activation. Each dot in updated Fig. 4L and Fig. S3H represent data from  
1023 individual zebrafish. A snapshot of the intestinal area was obtained to determine the  
1024 *trpa1b+ChR2+* and *trpa1b-ChR2+* EECs (Fig. S5H, I) and light pulses were applied to the  
1025 selected EECs as indicated above. Due to the mosaic expression of ChR2 in the EECs in the  
1026 Gal4-UAS transgenic system, the ChR2<sup>+</sup>EECs in both proximal and middle intestinal regions are  
1027 selected.

1028 To determine whether Optovin-UV or ChR2 was sufficient to activate EECs, *Tg(neurod1:Gcamp6f)*  
1029 zebrafish were used. To facilitate EEC calcium imaging under the confocal microscope, zebrafish  
1030 larvae were incubated in 20  $\mu$ M 4-DAMP, 10  $\mu$ M atropine and 20  $\mu$ M clozapine for 30 mins before  
1031 mounting in 1% LMA to reduce spontaneous motility. The Gcamp6f signal was recorded with  
1032 488nm laser intensity less than 0.5.

1033 The zebrafish intestinal motility is quantified through recorded image series of zebrafish intestine  
1034 using the method similar as previously described (Ganz et al., 2018). Intestinal  $\mu$  velocity and v  
1035 velocity were used to estimate intestinal motility in zebrafish as previously described using the  
1036 PIV-Lab MATLAB app (Ganz et al., 2018). A positive value of the  $\mu$  velocity indicates an  
1037 anterograde intestinal movement and a negative value of the  $\mu$  velocity indicates a retrograde  
1038 intestinal movement. The time-course  $\mu$  velocity number is plotted as heatmaps. When calculating  
1039 the mean velocity, only the mean velocity magnitude was calculated, which therefore doesn't  
1040 account for the movement direction. The MTrackJ FIJI plugin was used to quantify the mean  
1041 velocity magnitude (Meijering et al., 2012).

1042 To assess whether *Trpa1*<sup>+</sup>EEC activation induced intestinal motility change is due to the indirect  
1043 communication through vagal afferent and efferent system, we anatomically disconnected  
1044 zebrafish CNS with the intestine by decapitating. Optovin-treated unanesthetized zebrafish were  
1045 mounted and placed on the 780 Zeiss upright confocal station as described above. The zebrafish  
1046 head was then removed with a razor blade. The same imaging and 405nm activation of the mid-  
1047 intestinal region was performed as described above.

#### 1048 **Enteric cholinergic neuron and vagal ganglion calcium imaging**

1049 *TgBAC(chata:Gal4); Tg(UAS:Gcamp6s); Tg(NBT:DsRed)* or *TgBAC(chata:Gal4);*  
1050 *Tg(UAS:Gcamp6s); Tg(UAS:NTR-mCherry)* zebrafish were used to record *in vivo* calcium activity  
1051 in enteric cholinergic neurons. The NBT promoter labels all ENS neurons while the Chata  
1052 promoter labels only cholinergic enteric neurons. DsRed or mCherry fluorescence was used as  
1053 reference for cholinergic neuron Gcamp quantification. Zebrafish larvae were incubated in 20  $\mu$ M  
1054 4-DAMP for 30 mins before mounting in 1% LMA to reduce spontaneous motility and facilitate *in*  
1055 *vivo* imaging using a Zeiss 780 upright confocal microscope with 20 $\times$  water lenses. Serial images  
1056 were taken at 5 s/frame. To record cholinergic neuron calcium activation, zebrafish was pretreated  
1057 with Optovin and 40 nm light was applied at the frequency of 1 pulse/5s to the intestinal epithelium  
1058 ROI. The Gcamp6s to DsRed fluorescence in cholinergic neurons was calculated for recorded.

1059 *Tg(neurod1:Gcamp6f); Tg(neurod1:TagRFP)* zebrafish were used to record vagal sensory  
1060 ganglia calcium activity *in vivo*. Zebrafish were anesthetized with 1 mg/mL  $\alpha$ -Bungarotoxin ( $\alpha$ -  
1061 BTX) and gavaged with chemical compounds or bacteria as described (Naumann et al., 2016).



1062 Zebrafish larvae were mounted in 1% LMA and imaged under a Zeiss 780 upright confocal  
1063 microscope. Z-stack images of the entire vagal ganglia were collected as serial images at 10  
1064 mins/frame and processed in FIJI. Individual vagal sensory neurons were identified and the  
1065 Gcamp6f to TagRFP fluorescence ratios of individual vagal sensory neurons were calculated.

### 1066 **Quantitative real-time PCR**

1067 Quantitative real-time PCR was performed as described previously (Murdoch et al., 2019). In brief,  
1068 20 zebrafish larvae digestive tracts were dissected and pooled into 1 mL TRIzol (ThermoFisher,  
1069 15596026). mRNA was then isolated with isopropanol precipitation and washed with 70% ethanol.  
1070 500ng mRNA was used for cDNA synthesis using the iScript kit (Bio-Rad, 1708891). Quantitative  
1071 PCR was performed in triplicate 25  $\mu$ L reactions using 2X SYBR Green SuperMix (PerfeCTa, Hi  
1072 Rox, Quanta Biosciences, 95055) run on an ABI Step One Plus qPCR instrument using gene  
1073 specific primers (Supplementary file 1). Data were analyzed with the  $\Delta\Delta$ Ct method. *18S* was used  
1074 as a housekeeping gene to normalize gene expression.

### 1075 **Mammalian TRPA1 activity analysis**

1076 HEK-293T cells were cultured in DMEM (Thermofisher Scientific, Waltham, MA) and  
1077 supplemented with 10% fetal bovine serum (FBS) (Thermofisher Scientific), penicillin (100  
1078 units/mL) and streptomycin (0.1 mg/mL). Cells were plated on 100 mm tissue culture plates  
1079 coated with poly-D-lysine (Sigma Aldrich, Saint Louis, MO) and grown to ~60% confluence. The  
1080 cells were transiently transfected for 16-24 hours with either human or mouse orthologs of TRPA1  
1081 using Fugene 6 transfection reagents and Opti-MEM (Thermofisher Scientific) according to the  
1082 manufacturer's protocol. Subsequently, cells were trypsinized, re-suspended and re-plated onto  
1083 poly-D-lysine coated 96-well plates (Krystal black walled plates, Genesee Scientific) at  $5 \times 10^5$   
1084 cells/mL (100  $\mu$ L/well) and allowed to grow for another 16-20 hrs prior to the experiments. Cells  
1085 were maintained as monolayers in a 5% CO<sub>2</sub> incubator at 37°C.

1086 Measurements of changes in intracellular Ca<sup>2+</sup> concentrations ( $[Ca^{2+}]_i$ ) were performed as  
1087 described previously (Caceres et al., 2017). In brief, cells in 96-well plates were loaded with  
1088 Calcium 6, a no-wash fluorescent indicator, for 1.5 hrs (Molecular Devices, San Jose, CA) and  
1089 then transferred to a FlexStation III benchtop scanning fluorometer chamber (Molecular Devices).  
1090 Fluorescence measurements in the FlexStation were performed at 37°C (Ex:485 nm, Em: 525  
1091 nm at every 1.8 s). After recording baseline fluorescence, agonists (indole, IAld, cinnamaldehyde)  
1092 were added and fluorescence was monitored for a total of 60 s. To determine the effects of TRPA1  
1093 inhibition on agonist response, TRPA1 transfected HEK-293 cells were pretreated with various  
1094 concentrations of A967079 (Medchem101, Plymouth Meeting, PA), a specific antagonist of  
1095 TRPA1, and then exposed to either 100  $\mu$ M indole or IAld. The change in fluorescence was  
1096 measured as Fmax-F0, where Fmax is the maximum fluorescence and F0 is the baseline  
1097 fluorescence measured in each well. The EC50 and IC50 values and associated 95% confidence  
1098 intervals for agonist (Indole and IAld) stimulation of Ca<sup>2+</sup> influx and A967079 inhibition of agonist-  
1099 induced Ca<sup>2+</sup> influx, respectively, were determined by non-linear regression analysis with a 4-  
1100 parameter logistic equation (Graphpad Prism, San Diego, CA). Indole and IAld concentration-  
1101 response data was normalized to 1 mM cinnamaldehyde for EC50's calculations and A967079  
1102 concentration-response data was normalized to 100  $\mu$ M indole or IAld for IC50's calculations.

### 1103 **HPLC-MS analysis of Trp-Indole derivatives**

1104 The chemical profiling of Trp-Indole derivatives was performed using 1 L culture of *E. tarda*. The  
1105 strain was inoculated in 3 mL of TSB medium and cultivated for 1 day on a rotary shaker at 180  
1106 rpm at 30°C under aerobic conditions. After 1 day, 1 mL of *E. tarda* liquid culture was inoculated  
1107 in 1 L of TSB medium in a 4-L Pyrex flask. The *E. tarda* culture was incubated at 30°C for 24 hr  
1108 under aerobic conditions. For time-course screening, 10 mL from the *E. tarda* TSB culture was  
1109 collected at 0, 6, 18, and 24 hours. Each 10 mL sample of *E. tarda* culture was extracted with 15  
1110 mL of ethyl acetate (EtOAc). The EtOAc layer was separated from the aqueous layer and residual  
1111 water was removed by addition of anhydrous sodium sulfate. Each EtOAc fraction was dried  
1112 under reduced pressure, then resuspended in 500  $\mu$ L of 50% MeOH/50% H<sub>2</sub>O and 50  $\mu$ L of each  
1113 sample were analyzed using an Agilent Technologies 6130 quadrupole mass spectrometer  
1114 coupled with an Agilent Technologies 1200-series HPLC (Agilent Technologies, Waldbron,  
1115 Germany). The chemical screening was performed with a Kinetex® EVO C18 column (100  $\times$  4.6  
1116 mm, 5  $\mu$ m) using the gradient solvent system (10 % ACN/90 % H<sub>2</sub>O to 100 % ACN over 20 min  
1117 at a flow rate of 0.7 mL/min).

1118 For HPLC-MS analysis of *E. tarda* in GZM medium, the remaining 1 L culture of *E. tarda* in TSB  
1119 culture was centrifuged at 7,000 rpm for 30 min. Pellets were transferred to 1 L of GZM medium  
1120 in a 4-L Pyrex flask and cultivated on a rotary shaker at 30°C for 24 hr. For time-course screening,  
1121 10 mL from the *E. tarda* GZM culture was collected at 0, 1, 6, and 24 hours. Sample preparation  
1122 and HPLC-MS analysis of *E. tarda* culture GZM medium were performed using same procedures  
1123 as described above for TSB. Trp-Indole derivatives of *E. tarda* culture broths were identified by  
1124 comparing the retention time and extracted ion chromatogram with authentic standards. Extracted  
1125 ions were selected for Indole (m/z 117, Sigma-Aldrich), IAld (m/z 145, Sigma-Aldrich), IAAld (m/z  
1126 159, Ambeed), IET (m/z 161, Sigma-Aldrich), IAM (m/z 174, Sigma-Aldrich), IAA (m/z 175, Sigma-  
1127 Aldrich), and IpyA (m/z 203, Sigma-Aldrich).

1128 For HPLC-MS analysis of Trp-indole derivatives from 15 different bacterial strains in TSB medium,  
1129 each of the strains (*Acinetobacter* sp. ZOR0008, *Aeromonas veronii* ZOR0002, *Bacillus subtilis*  
1130 168, *Chryseobacterium* sp. ZOR0023, *Edwardsiella tarda* 15974, *Edwardsiella tarda* 23685,  
1131 *Edwardsiella tarda* LSE40, *Edwardsiella tarda* FLG6-60, *Enterobacter* sp. ZOR0014, *Escherichia*  
1132 *coli* MG1655, *Exiguobacterium acetylicum* sp. ZWU0009, *Plesiomonas* sp. ZOR0011,  
1133 *Pseudomonas aeruginosa* PAK, *Shewanella* sp. ZOR0012, and *Vibrio* sp. ZWU0020) were  
1134 inoculated in 3 mL of TSB medium and cultivated for 1 day on a rotary shaker at 180 rpm at 30°C  
1135 under aerobic conditions. After 1 day, 1 mL of each liquid culture was inoculated in 100 mL of  
1136 TSB medium in 500 mL Pyrex flasks and cultivated on a rotary shaker at 30°C overnight. A 10  
1137 mL sample was taken from each culture and extracted and analyzed via HPLC-MS as explained  
1138 above. CFU was calculated for each bacterial liquid culture and the HPLC-MS data was  
1139 normalized to the CFU.

1140 For HPLC-MS analysis of Trp-indole derivatives from 15 different bacterial strains in GZM medium,  
1141 the remaining 100 mL culture of each strain was centrifuged at 4500 rpm for 20 min. Pellets were  
1142 transferred to 100 mL of GZM medium in 500 mL Pyrex flasks and cultivated on a rotary shaker  
1143 at 30°C overnight. Sample preparation and HPLC-MS analysis of each GZM culture were  
1144 performed using the same procedure as described above.

1145 For HPLC-MS analysis of Trp-indole derivatives from murine small intestine and large intestine,  
1146 three 10-week old female and three 10-week old male conventionally-reared specific pathogen-  
1147 free C57BL/6J mice were ordered from Jackson Lab. The mice were not fast in advance and  
1148 euthanized with 5% isoflurane. The 2/5-4/5 portion of the small intestinal region and the colon

1149 caudal to cecum was collected from each mouse and transferred to a 50 mL conical tube that was  
1150 placed on dry-ice. 80% methanol was then added according to the tissue weight (50  $\mu$ L/mg tissue).  
1151 The intestine was then homogenized with a Tissue-Tearor (BioSpec Products, 985370). Following  
1152 homogenizing, the tryptophan metabolites were extracted and analyzed with HPLC-MS as  
1153 explained above. The relative metabolite abundance was normalized to tissue weight. These  
1154 mouse experiments conformed to the US Public Health Service Policy on Humane Care and Use  
1155 of Laboratory Animals, using protocol number A170-17-07 approved by the Institutional Animal  
1156 Care and Use Committee of Duke University.

### 1157 **Measurement of serotonin release from mouse and human small intestine**

1158 These experiments using C57BL/6J mice were approved by the Flinders University Animal  
1159 Welfare Committee (number 965-19) and human ileum tissue was collected from resected small  
1160 and large intestine from patients that gave written informed consent under the approval of the  
1161 Southern Adelaide Clinical Human Research Ethics Committee (number 50.07) as previous (Sun  
1162 et al., 2019a). Mice were euthanized at 8 to 12 weeks by isoflurane overdose followed by cervical  
1163 dislocation. The duodenum was removed and placed in Krebs solution oxygenated with 95 % O<sub>2</sub>,  
1164 5 % CO<sub>2</sub>. A midline incision was made along the duodenum to create a flat sheet, the section was  
1165 pinned mucosal-side up in an organ bath lined with Sylgard and containing oxygenated Krebs  
1166 solution. Serotonin release was measured using amperometry. A carbon-fibre electrode (5- $\mu$ m  
1167 diameter, ProCFE; Dagan Corporation, Minneapolis, MN), was lowered above the mucosa and  
1168 400 mV potential was applied to the electrode causing oxidation of serotonin (Zelkas et al., 2015).  
1169 10mM Indole and/or 50 $\mu$ M HC030031 were applied to tissue by constantly perfusing the bath.  
1170 The change in amplitude due to serotonin oxidation was recorded using an EPC-10 amplifier and  
1171 Pulse software (HEKA Electronic, Lambrecht/Pfalz, Germany), and samples at 10 kHz and low-  
1172 pass filtered at 1 kHz. Data was assessed as peak current during each treatment. Data was  
1173 analyzed comparing all groups using one-way ANOVA with Tukey's post-hoc test. For the mouse  
1174 experiments, 6 independent experiments were performed in 6 mouse duodenal samples. For the  
1175 human experiments, 4 independent experiments were performed in 3 human samples.

### 1176 **Statistical analysis**

1177 The appropriate sample size for each experiment was suggested by preliminary experiments  
1178 evaluating variance and effects. Using significance level of 0.05 and power of 90%, a biological  
1179 replicate sample number 8 was suggested for EEC CaMPARI analysis. For each experiment,  
1180 wildtype or indicated transgenic zebrafish embryos were randomly allocated to test groups prior  
1181 to treatment. Individual data points, mean and standard deviation are plotted in each figure. The  
1182 raw data points in each figure are represented as solid dots. Data were analyzed using GraphPad  
1183 Prism 7 software. For experiments comparing just two differentially treated populations, a  
1184 Student's t-test with equal variance assumptions was used. For experiments measuring a single  
1185 variable with multiple treatment groups, a single factor ANOVA with post hoc means testing  
1186 (Tukey) was utilized. Statistical evaluation for each figure was marked \* P<0.05, \*\* P<0.01, \*\*\*  
1187 P<0.001, \*\*\*\* P<0.0001 or ns (no significant difference, P>0.05).

### 1188 **SUPPLEMENTAL TABLES AND VIDEOS**

1189 **Table S1. Zebrafish EEC RNA-seq data analyzed by DEseq2, related to Figure 2.**

1190 **Table S2. Comparison of zebrafish EECs with human and mouse EECs using RNA-seq,**  
1191 **related to Figure 2.**

1192 **Table S3. Expression of hormones, transcription factors, receptors, and innate immune**  
1193 **genes in EECs and other IECs, related to Figure 2.**

1194 **Video 1. *E. tarda* activates EECs *in vivo*, related to Figure 1.** Time-course video of  
1195 *Tg(neurod1:Gcamp6f)* zebrafish stimulated with *E. tarda* bacteria. Anterior is to the right, and  
1196 dorsal is to the top.

1197 **Video 2. Trpa1 agonist activates EECs *in vivo*, related to Figure 2.** Time-course videos of  
1198 *trpa1b<sup>+/+</sup>* and *trpa1b<sup>-/-</sup>* *Tg(neurod1:Gcamp6f)* zebrafish stimulated with Trpa1 agonist AITC.  
1199 Anterior is to the right, and dorsal is to the top.

1200 **Video 3. Optovin-UV activates EECs, related to Figure 4.** Time-course video of  
1201 *Tg(neurod1:Gcamp6f); Tg(neurod1:TagRFP)* zebrafish before and post Optovin-UV induced  
1202 EEC Trpa1 activation. Anterior is to the left, and dorsal is to the bottom.

1203 **Video 4. Activation of EEC Trpa1 in control zebrafish increases intestinal motility, related**  
1204 **to Figure 4.** Time-course video of *Tg(neurod1:Gcamp6f)* WT zebrafish before and post  
1205 Optovin-UV induced EEC Trpa1 activation. Anterior is to the left, and dorsal is to the top.

1206 **Video 5. Activation of EEC Trpa1 in EEC ablated zebrafish does not increase intestinal**  
1207 **motility, related to Figure 4.** Time-course video of *Tg(neurod1:Gcamp6f)* EEC ablated  
1208 zebrafish before and post Optovin-UV induced EEC Trpa1 activation. Anterior is to the left, and  
1209 dorsal is to the top.

1210 **Video 6. Optic EEC activation in EEC-ChR2 expressing transgenic zebrafish, related to**  
1211 **Figure 4.** Time-course video of *Tg(neurod1:Gcamp6f); Tg(neurod1:Gal4); Tg(UAS:ChR2-*  
1212 *mCherry)* zebrafish before and post yellow light induced EEC activation. Anterior is to the left,  
1213 and dorsal is to the bottom.

1214 **Video 7. Activation of Trpa1+ChR2+EECs increases intestine motility, related to Figure 4.**  
1215 Time-course videos of *TgBAC(trpa1b:EGFP); Tg(neurod1:Gal4); Tg(UAS:ChR2-mCherry)*  
1216 before and post optic activation of Trpa1-EECs and Trpa1+ EECs. Anterior is to the left, and  
1217 dorsal is to the bottom. The yellow light was delivered specifically to the selected EECs to  
1218 activate the ChR2 channel. Note that the first frame in each video shows the EGFP channel to  
1219 identify EECs that do or do not express *trpa1b*. Also note that the ChR2 EECs are in the  
1220 intestinal bulb and an anterograde intestinal movement was observed upon Trpa1+ChR2+EEC  
1221 activation.

1222 **Video 8. Activation of middle intestinal Trpa1+ChR2+EECs increases intestine motility,**  
1223 **related to Figure 4.** Time-course videos of *TgBAC(trpa1b:EGFP); Tg(neurod1:Gal4);*  
1224 *Tg(UAS:ChR2-mCherry)* before and post optic activation of Trpa1+ EECs. Anterior to the left.  
1225 Note that the Trpa1+ChR2+EECs are in the posterior intestine and activation of the posterior  
1226 intestinal Trpa1+ChR2+EECs induces anterograde intestinal movement.

1227 **Video 9. *E. tarda* increases intestinal motility, related to Figure 4.** Time-course videos of  
1228 WT zebrafish 30 mins post *Aeromonas* sp. or *E. tarda* gavage. Anterior is to the left, and dorsal  
1229 is to the top.

1230 **Video 10. EECs physically connect to Chata+ enteric neurons, related to Figure 5.** 3D-  
1231 reconstruction of *Tg(chata: NTR-mCherry)* zebrafish intestine stained with 2F11 antibody that  
1232 labels EEC. The Chata+ nerve is shown as magenta and the EECs are shown as green.

1233 **Video 11. Activation of EEC Trpa1 increases Chata+ ENS calcium, related to Figure 5.**  
1234 Time-course videos of *TgBAC(chata:Gal4); Tg(UAS;Gcamp6s)* that before and post Optovin-UV  
1235 induced EEC Trpa1 activation. Anterior is to the left, and dorsal is to the top.

1236 **Video 12. *E. tarda* increases vagal ganglia calcium, related to Figure 6.** Time-course videos  
1237 of vagal ganglia calcium in *Tg(neurod1:Gcamp6f); Tg(neurod1:TagRFP)* zebrafish that are  
1238 gavaged PBS or *E. tarda*. Anterior is to the left, and dorsal is to the top.

1239 **Video 13. IAld activates EECs *in vivo*, related to Figure 7.** Time-course videos of *trpa1b+/+*  
1240 (WT) and *trpa1b/- Tg(neurod1:Gcamp6f)* zebrafish that are stimulated with IAld. Note that there  
1241 is a basal amount of intestinal motility associated with this methylcellulose preparation that is  
1242 retained in vehicle-only negative controls (not shown) and in *trpa1b* mutants. Anterior is to the  
1243 right, and dorsal is to the top.

1244 **Video 14. Indole activates EECs *in vivo*, related to Figure 7.** Time-course videos of  
1245 *trpa1b+/+* (WT) and *trpa1b/- Tg(neurod1:Gcamp6f)* zebrafish that are stimulated with indole.  
1246 Note that there is a basal amount of intestinal motility associated with this methylcellulose  
1247 preparation that is retained in vehicle-only negative controls (not shown) and in *trpa1b* mutants.  
1248 Anterior is to the right, and dorsal is to the top.

#### 1249 REFERENCES:

- 1250 ABAYNEH, T., COLQUHOUN, D. J. & SORUM, H. 2013. *Edwardsiella piscicida* sp. nov., a novel species  
1251 pathogenic to fish. *J Appl Microbiol*, 114, 644-54.
- 1252 ALVERS, A. L., RYAN, S., SCHERZ, P. J., HUISKEN, J. & BAGNAT, M. 2014. Single continuous lumen formation  
1253 in the zebrafish gut is mediated by smoothed-dependent tissue remodeling. *Development*, 141,  
1254 1110-9.
- 1255 AVELAR RODRIGUEZ, D., RYAN, P. M., TORO MONJARAZ, E. M., RAMIREZ MAYANS, J. A. & QUIGLEY, E. M.  
1256 2019. Small Intestinal Bacterial Overgrowth in Children: A State-Of-The-Art Review. *Front Pediatr*,  
1257 7, 363.
- 1258 BAUTISTA, D. M., JORDT, S. E., NIKAI, T., TSURUDA, P. R., READ, A. J., POBLETE, J., YAMOA, E. N.,  
1259 BASBAUM, A. I. & JULIUS, D. 2006. TRPA1 mediates the inflammatory actions of environmental  
1260 irritants and proalgesic agents. *Cell*, 124, 1269-82.
- 1261 BAUTISTA, D. M., PELLEGRINO, M. & TSUNOZAKI, M. 2013. TRPA1: A gatekeeper for inflammation. *Annu*  
1262 *Rev Physiol*, 75, 181-200.
- 1263 BELLONO, N. W., BAYRER, J. R., LEITCH, D. B., CASTRO, J., ZHANG, C., O'DONNELL, T. A., BRIERLEY, S. M.,  
1264 INGRAHAM, H. A. & JULIUS, D. 2017. Enterochromaffin Cells Are Gut Chemosensors that Couple  
1265 to Sensory Neural Pathways. *Cell*, 170, 185-198 e16.
- 1266 BERCIK, P., PARK, A. J., SINCLAIR, D., KHOSHDEL, A., LU, J., HUANG, X., DENG, Y., BLENNERHASSETT, P. A.,  
1267 FAHNESTOCK, M., MOINE, D., BERGER, B., HUIZINGA, J. D., KUNZE, W., MCLEAN, P. G.,  
1268 BERGONZELLI, G. E., COLLINS, S. M. & VERDU, E. F. 2011. The anxiolytic effect of *Bifidobacterium*  
1269 *longum* NCC3001 involves vagal pathways for gut-brain communication. *Neurogastroenterol*  
1270 *Motil*, 23, 1132-9.
- 1271 BERTHOUD, H. R., SUTTON, G. M., TOWNSEND, R. L., PATTERSON, L. M. & ZHENG, H. 2006. Brainstem  
1272 mechanisms integrating gut-derived satiety signals and descending forebrain information in the  
1273 control of meal size. *Physiol Behav*, 89, 517-24.
- 1274 BHATTARAI, Y., WILLIAMS, B. B., BATTAGLIOLI, E. J., WHITAKER, W. R., TILL, L., GROVER, M., LINDEN, D. R.,  
1275 AKIBA, Y., KANDIMALLA, K. K., ZACHOS, N. C., KAUNITZ, J. D., SONNENBURG, J. L., FISCHBACH, M.  
1276 A., FARRUGIA, G. & KASHYAP, P. C. 2018. Gut Microbiota-Produced Tryptamine Activates an

- 1277 Epithelial G-Protein-Coupled Receptor to Increase Colonic Secretion. *Cell Host Microbe*, 23, 775-  
1278 785 e5.
- 1279 BILLING, L. J., LARRAUFIE, P., LEWIS, J., LEITER, A., LI, J., LAM, B., YEO, G. S., GOLDSPIK, D. A., KAY, R. G.,  
1280 GRIBBLE, F. M. & REIMANN, F. 2019. Single cell transcriptomic profiling of large intestinal  
1281 enteroendocrine cells in mice - Identification of selective stimuli for insulin-like peptide-5 and  
1282 glucagon-like peptide-1 co-expressing cells. *Mol Metab*, 29, 158-169.
- 1283 BOHORQUEZ, D. V., SAMSA, L. A., ROHOLT, A., MEDICETTY, S., CHANDRA, R. & LIDDLE, R. A. 2014. An  
1284 enteroendocrine cell-enteric glia connection revealed by 3D electron microscopy. *PLoS One*, 9,  
1285 e89881.
- 1286 BOHORQUEZ, D. V., SHAHID, R. A., ERDMANN, A., KREGER, A. M., WANG, Y., CALAKOS, N., WANG, F. &  
1287 LIDDLE, R. A. 2015. Neuroepithelial circuit formed by innervation of sensory enteroendocrine cells.  
1288 *J Clin Invest*, 125, 782-6.
- 1289 BONAZ, B., BAZIN, T. & PELLISSIER, S. 2018. The Vagus Nerve at the Interface of the Microbiota-Gut-Brain  
1290 Axis. *Front Neurosci*, 12, 49.
- 1291 BONDURAND, N. & SHAM, M. H. 2013. The role of SOX10 during enteric nervous system development.  
1292 *Dev Biol*, 382, 330-43.
- 1293 BORNSTEIN, J. C. 2006. Intrinsic sensory neurons of mouse gut--toward a detailed knowledge of enteric  
1294 neural circuitry across species. Focus on "characterization of myenteric sensory neurons in the  
1295 mouse small intestine". *J Neurophysiol*, 96, 973-4.
- 1296 BRAVO, J. A., FORSYTHE, P., CHEW, M. V., ESCARAVAGE, E., SAVIGNAC, H. M., DINAN, T. G., BIENENSTOCK,  
1297 J. & CRYAN, J. F. 2011. Ingestion of Lactobacillus strain regulates emotional behavior and central  
1298 GABA receptor expression in a mouse via the vagus nerve. *Proc Natl Acad Sci U S A*, 108, 16050-  
1299 5.
- 1300 BREIT, S., KUPFERBERG, A., ROGLER, G. & HASLER, G. 2018. Vagus Nerve as Modulator of the Brain-Gut  
1301 Axis in Psychiatric and Inflammatory Disorders. *Front Psychiatry*, 9, 44.
- 1302 BROOKES, S. J., SPENCER, N. J., COSTA, M. & ZAGORODNYUK, V. P. 2013. Extrinsic primary afferent  
1303 signalling in the gut. *Nat Rev Gastroenterol Hepatol*, 10, 286-96.
- 1304 BROWN, J. M. & HAZEN, S. L. 2015. The gut microbial endocrine organ: bacterially derived signals driving  
1305 cardiometabolic diseases. *Annu Rev Med*, 66, 343-59.
- 1306 BUJAN, N., MOHAMMED, H., BALBOA, S., ROMALDE, J. L., TORANZO, A. E., ARIAS, C. R. & MAGARINOS, B.  
1307 2018. Genetic studies to re-affiliate *Edwardsiella tarda* fish isolates to *Edwardsiella piscicida* and  
1308 *Edwardsiella anguillarum* species. *Syst Appl Microbiol*, 41, 30-37.
- 1309 CACERES, A. I., LIU, B., JABBA, S. V., ACHANTA, S., MORRIS, J. B. & JORDT, S. E. 2017. Transient Receptor  
1310 Potential Cation Channel Subfamily M Member 8 channels mediate the anti-inflammatory effects  
1311 of eucalyptol. *Br J Pharmacol*, 174, 867-879.
- 1312 CHIMEREL, C., EMERY, E., SUMMERS, D. K., KEYSER, U., GRIBBLE, F. M. & REIMANN, F. 2014. Bacterial  
1313 metabolite indole modulates incretin secretion from intestinal enteroendocrine L cells. *Cell Rep*,  
1314 9, 1202-8.
- 1315 CHOI, E. Y., LEE, H., DINGLE, R. W., KIM, K. B. & SWANSON, H. I. 2012. Development of novel CH223191-  
1316 based antagonists of the aryl hydrocarbon receptor. *Mol Pharmacol*, 81, 3-11.
- 1317 COCCHIARO, J. L. & RAWLS, J. F. 2013. Microgavage of zebrafish larvae. *J Vis Exp*, e4434.
- 1318 CORNELISSEN, W., DE LAET, A., KROESE, A. B., VAN BOGAERT, P. P., SCHEUERMANN, D. W. &  
1319 TIMMERMANS, J. P. 2000. Electrophysiological features of morphological Dogiel type II neurons  
1320 in the myenteric plexus of pig small intestine. *J Neurophysiol*, 84, 102-11.
- 1321 CRONAN, M. R., BEERMAN, R. W., ROSENBERG, A. F., SAELENS, J. W., JOHNSON, M. G., OEHLERS, S. H.,  
1322 SISK, D. M., JURCIC SMITH, K. L., MEDVITZ, N. A., MILLER, S. E., TRINH, L. A., FRASER, S. E., MADDEN,  
1323 J. F., TURNER, J., STOUT, J. E., LEE, S. & TOBIN, D. M. 2016. Macrophage Epithelial Reprogramming  
1324 Underlies Mycobacterial Granuloma Formation and Promotes Infection. *Immunity*, 45, 861-876.

- 1325 ESPENSCHIED, S. T., CRONAN, M. R., MATTY, M. A., MUELLER, O., REDINBO, M. R., TOBIN, D. M. & RAWLS,  
1326 J. F. 2019. Epithelial delamination is protective during pharmaceutical-induced enteropathy. *Proc*  
1327 *Natl Acad Sci U S A*, 116, 16961-16970.
- 1328 FLORES, E. M., NGUYEN, A. T., ODEM, M. A., EISENHOFER, G. T. & KRACHLER, A. M. 2020. The zebrafish  
1329 as a model for gastrointestinal tract-microbe interactions. *Cell Microbiol*, 22, e13152.
- 1330 FOGLIA, M. J., CAO, J., TORNINI, V. A. & POSS, K. D. 2016. Multicolor mapping of the cardiomyocyte  
1331 proliferation dynamics that construct the atrium. *Development*, 143, 1688-96.
- 1332 FOSQUE, B. F., SUN, Y., DANA, H., YANG, C. T., OHYAMA, T., TADROSS, M. R., PATEL, R., ZLATIC, M., KIM,  
1333 D. S., AHRENS, M. B., JAYARAMAN, V., LOOGER, L. L. & SCHREITER, E. R. 2015. Neural circuits.  
1334 Labeling of active neural circuits in vivo with designed calcium integrators. *Science*, 347, 755-60.
- 1335 FULLING, C., DINAN, T. G. & CRYAN, J. F. 2019. Gut Microbe to Brain Signaling: What Happens in Vagus.  
1336 *Neuron*, 101, 998-1002.
- 1337 FURNESS, J. B., CALLAGHAN, B. P., RIVERA, L. R. & CHO, H. J. 2014. The enteric nervous system and  
1338 gastrointestinal innervation: integrated local and central control. *Adv Exp Med Biol*, 817, 39-71.
- 1339 FURNESS, J. B., KUNZE, W. A. & CLERC, N. 1999. Nutrient tasting and signaling mechanisms in the gut. II.  
1340 The intestine as a sensory organ: neural, endocrine, and immune responses. *Am J Physiol*, 277,  
1341 G922-8.
- 1342 FURNESS, J. B., RIVERA, L. R., CHO, H. J., BRAVO, D. M. & CALLAGHAN, B. 2013. The gut as a sensory organ.  
1343 *Nat Rev Gastroenterol Hepatol*, 10, 729-40.
- 1344 GANZ, J., BAKER, R. P., HAMILTON, M. K., MELANCON, E., DIBA, P., EISEN, J. S. & PARTHASARATHY, R. 2018.  
1345 Image velocimetry and spectral analysis enable quantitative characterization of larval zebrafish  
1346 gut motility. *Neurogastroenterol Motil*, 30, e13351.
- 1347 GEHART, H., VAN ES, J. H., HAMER, K., BEUMER, J., KRETZSCHMAR, K., DEKKERS, J. F., RIOS, A. & CLEVERS,  
1348 H. 2019. Identification of Enteroendocrine Regulators by Real-Time Single-Cell Differentiation  
1349 Mapping. *Cell*, 176, 1158-1173 e16.
- 1350 GERSHON, M. D. 2004. Review article: serotonin receptors and transporters -- roles in normal and  
1351 abnormal gastrointestinal motility. *Aliment Pharmacol Ther*, 20 Suppl 7, 3-14.
- 1352 GERSHON, M. D. 2013. 5-Hydroxytryptamine (serotonin) in the gastrointestinal tract. *Curr Opin Endocrinol*  
1353 *Diabetes Obes*, 20, 14-21.
- 1354 GHOSHAL, U. C. & GWEE, K. A. 2017. Post-infectious IBS, tropical sprue and small intestinal bacterial  
1355 overgrowth: the missing link. *Nat Rev Gastroenterol Hepatol*, 14, 435-441.
- 1356 GHOSHAL, U. C., SHUKLA, R. & GHOSHAL, U. 2017. Small Intestinal Bacterial Overgrowth and Irritable  
1357 Bowel Syndrome: A Bridge between Functional Organic Dichotomy. *Gut Liver*, 11, 196-208.
- 1358 GHOSHAL, U. C., SRIVASTAVA, D., GHOSHAL, U. & MISRA, A. 2014. Breath tests in the diagnosis of small  
1359 intestinal bacterial overgrowth in patients with irritable bowel syndrome in comparison with  
1360 quantitative upper gut aspirate culture. *Eur J Gastroenterol Hepatol*, 26, 753-60.
- 1361 GRILL, H. J. & HAYES, M. R. 2009. The nucleus tractus solitarius: a portal for visceral afferent signal  
1362 processing, energy status assessment and integration of their combined effects on food intake.  
1363 *Int J Obes (Lond)*, 33 Suppl 1, S11-5.
- 1364 GUO, X., YIN, C., YANG, F., ZHANG, Y., HUANG, H., WANG, J., DENG, B., CAI, T., RAO, Y. & XI, R. 2019. The  
1365 Cellular Diversity and Transcription Factor Code of Drosophila Enteroendocrine Cells. *Cell Rep*, 29,  
1366 4172-4185 e5.
- 1367 GUPTA, V. & POSS, K. D. 2012. Clonally dominant cardiomyocytes direct heart morphogenesis. *Nature*,  
1368 484, 479-84.
- 1369 HABER, A. L., BITON, M., ROGEL, N., HERBST, R. H., SHEKHAR, K., SMILLIE, C., BURGIN, G., DELOREY, T. M.,  
1370 HOWITT, M. R., KATZ, Y., TIROSH, I., BEYAZ, S., DIONNE, D., ZHANG, M., RAYCHOWDHURY, R.,  
1371 GARRETT, W. S., ROZENBLATT-ROSEN, O., SHI, H. N., YILMAZ, O., XAVIER, R. J. & REGEV, A. 2017.  
1372 A single-cell survey of the small intestinal epithelium. *Nature*, 551, 333-339.

- 1373 HAN, W., TELLEZ, L. A., PERKINS, M. H., PEREZ, I. O., QU, T., FERREIRA, J., FERREIRA, T. L., QUINN, D., LIU,  
1374 Z. W., GAO, X. B., KAELEBERER, M. M., BOHORQUEZ, D. V., SHAMMAH-LAGNADO, S. J., DE  
1375 LARTIGUE, G. & DE ARAUJO, I. E. 2018. A Neural Circuit for Gut-Induced Reward. *Cell*, 175, 665-  
1376 678 e23.
- 1377 HEATH-PAGLIUSO, S., ROGERS, W. J., TULLIS, K., SEIDEL, S. D., CENIJN, P. H., BROUWER, A. & DENISON, M.  
1378 S. 1998. Activation of the Ah receptor by tryptophan and tryptophan metabolites. *Biochemistry*,  
1379 37, 11508-15.
- 1380 HOLZER, P. 2011. TRP channels in the digestive system. *Curr Pharm Biotechnol*, 12, 24-34.
- 1381 HUBBARD, T. D., MURRAY, I. A., BISSON, W. H., LAHOTI, T. S., GOWDA, K., AMIN, S. G., PATTERSON, A. D.  
1382 & PERDEW, G. H. 2015. Adaptation of the human aryl hydrocarbon receptor to sense microbiota-  
1383 derived indoles. *Sci Rep*, 5, 12689.
- 1384 JAGLIN, M., RHIMI, M., PHILIPPE, C., PONS, N., BRUNEAU, A., GOUSTARD, B., DAUGE, V., MAGUIN, E.,  
1385 NAUDON, L. & RABOT, S. 2018. Indole, a Signaling Molecule Produced by the Gut Microbiota,  
1386 Negatively Impacts Emotional Behaviors in Rats. *Front Neurosci*, 12, 216.
- 1387 JIN, U. H., LEE, S. O., SRIDHARAN, G., LEE, K., DAVIDSON, L. A., JAYARAMAN, A., CHAPKIN, R. S., ALANIZ, R.  
1388 & SAFE, S. 2014. Microbiome-derived tryptophan metabolites and their aryl hydrocarbon  
1389 receptor-dependent agonist and antagonist activities. *Mol Pharmacol*, 85, 777-88.
- 1390 JOHN HAYNES, W., ZHOU, X. L., SU, Z. W., LOUKIN, S. H., SAIMI, Y. & KUNG, C. 2008. Indole and other  
1391 aromatic compounds activate the yeast TRPY1 channel. *FEBS Lett*, 582, 1514-8.
- 1392 JOHNSON, C. D., BARLOW-ANACKER, A. J., PIERRE, J. F., TOUW, K., ERICKSON, C. S., FURNESS, J. B., EPSTEIN,  
1393 M. L. & GOSAIN, A. 2018. Deletion of choline acetyltransferase in enteric neurons results in  
1394 postnatal intestinal dysmotility and dysbiosis. *FASEB J*, 32, 4744-4752.
- 1395 KAELEBERER, M. M., BUCHANAN, K. L., KLEIN, M. E., BARTH, B. B., MONTOYA, M. M., SHEN, X. &  
1396 BOHORQUEZ, D. V. 2018. A gut-brain neural circuit for nutrient sensory transduction. *Science*, 361.
- 1397 KAIKO, G. E. & STAPPENBECK, T. S. 2014. Host-microbe interactions shaping the gastrointestinal  
1398 environment. *Trends Immunol*, 35, 538-48.
- 1399 KASTL, A. J., JR., TERRY, N. A., WU, G. D. & ALBENBERG, L. G. 2020. The Structure and Function of the  
1400 Human Small Intestinal Microbiota: Current Understanding and Future Directions. *Cell Mol*  
1401 *Gastroenterol Hepatol*, 9, 33-45.
- 1402 KAWAKAMI, K. 2007. Tol2: a versatile gene transfer vector in vertebrates. *Genome Biol*, 8 Suppl 1, S7.
- 1403 KIM, D. J., VENKATARAMAN, A., JAIN, P. C., WIESLER, E. P., DEBLASIO, M., KLEIN, J., TU, S. S., LEE, S.,  
1404 MEDZHITOV, R. & IWASAKI, A. 2020. Vitamin B12 and folic acid alleviate symptoms of nutritional  
1405 deficiency by antagonizing aryl hydrocarbon receptor. *Proc Natl Acad Sci U S A*, 117, 15837-15845.
- 1406 KNIGHT, R. D., MEBUS, K., D'ANGELO, A., YOKOYA, K., HEANUE, T., TUBINGEN SCREEN, C. & ROEHL, H.  
1407 2011. Ret signalling integrates a craniofacial muscle module during development. *Development*,  
1408 138, 2015-24.
- 1409 KOKEL, D., CHEUNG, C. Y., MILLS, R., COUTINHO-BUDD, J., HUANG, L., SETOLA, V., SPRAGUE, J., JIN, S., JIN,  
1410 Y. N., HUANG, X. P., BRUNI, G., WOOLF, C. J., ROTH, B. L., HAMBLIN, M. R., ZYLKA, M. J., MILAN, D.  
1411 J. & PETERSON, R. T. 2013. Photochemical activation of TRPA1 channels in neurons and animals.  
1412 *Nat Chem Biol*, 9, 257-63.
- 1413 KUNST, M., LAURELL, E., MOKAYES, N., KRAMER, A., KUBO, F., FERNANDES, A. M., FORSTER, D., DAL  
1414 MASCHIO, M. & BAIER, H. 2019. A Cellular-Resolution Atlas of the Larval Zebrafish Brain. *Neuron*,  
1415 103, 21-38 e5.
- 1416 KWAN, K. M., FUJIMOTO, E., GRABHER, C., MANGUM, B. D., HARDY, M. E., CAMPBELL, D. S., PARANT, J.  
1417 M., YOST, H. J., KANKI, J. P. & CHIEN, C. B. 2007. The Tol2kit: a multisite gateway-based  
1418 construction kit for Tol2 transposon transgenesis constructs. *Dev Dyn*, 236, 3088-99.
- 1419 LAPOINTE, T. K. & ALTIER, C. 2011. The role of TRPA1 in visceral inflammation and pain. *Channels (Austin)*,  
1420 5, 525-9.



- 1421 LEITE, G., MORALES, W., WEITSMAN, S., CELLY, S., PARODI, G., MATHUR, R., BARLOW, G. M., SEDIGHI, R.,  
1422 MILLAN, M. J. V., REZAIIE, A. & PIMENTEL, M. 2020. The duodenal microbiome is altered in small  
1423 intestinal bacterial overgrowth. *PLoS One*, 15, e0234906.
- 1424 LI, Z., CHALAZONITIS, A., HUANG, Y. Y., MANN, J. J., MARGOLIS, K. G., YANG, Q. M., KIM, D. O., COTE, F.,  
1425 MALLETT, J. & GERSHON, M. D. 2011. Essential roles of enteric neuronal serotonin in  
1426 gastrointestinal motility and the development/survival of enteric dopaminergic neurons. *J*  
1427 *Neurosci*, 31, 8998-9009.
- 1428 LIU, Y., HOU, Y., WANG, G., ZHENG, X. & HAO, H. 2020. Gut Microbial Metabolites of Aromatic Amino Acids  
1429 as Signals in Host-Microbe Interplay. *Trends Endocrinol Metab*.
- 1430 LOVE, M. I., HUBER, W. & ANDERS, S. 2014. Moderated estimation of fold change and dispersion for RNA-  
1431 seq data with DESeq2. *Genome Biol*, 15, 550.
- 1432 LU, V. B., GRIBBLE, F. M. & REIMANN, F. 2018. Free Fatty Acid Receptors in Enteroendocrine Cells.  
1433 *Endocrinology*, 159, 2826-2835.
- 1434 MACPHERSON, L. J., DUBIN, A. E., EVANS, M. J., MARR, F., SCHULTZ, P. G., CRAVATT, B. F. & PATAPOUTIAN,  
1435 A. 2007. Noxious compounds activate TRPA1 ion channels through covalent modification of  
1436 cysteines. *Nature*, 445, 541-5.
- 1437 MATHIAS, J. R., ZHANG, Z., SAXENA, M. T. & MUMM, J. S. 2014. Enhanced cell-specific ablation in zebrafish  
1438 using a triple mutant of Escherichia coli nitroreductase. *Zebrafish*, 11, 85-97.
- 1439 MCGRAW, H. F., SNELSON, C. D., PRENDERGAST, A., SULI, A. & RAIBLE, D. W. 2012. Postembryonic  
1440 neuronal addition in zebrafish dorsal root ganglia is regulated by Notch signaling. *Neural Dev*, 7,  
1441 23.
- 1442 MEDZHITOV, R. 2007. Recognition of microorganisms and activation of the immune response. *Nature*, 449,  
1443 819-26.
- 1444 MEIJERING, E., DZYUBACHYK, O. & SMAL, I. 2012. Methods for cell and particle tracking. *Methods Enzymol*,  
1445 504, 183-200.
- 1446 MESEGUER, V., ALPIZAR, Y. A., LUIS, E., TAJADA, S., DENLINGER, B., FAJARDO, O., MANENSCHIJN, J. A.,  
1447 FERNANDEZ-PENA, C., TALAVERA, A., KICHKO, T., NAVIA, B., SANCHEZ, A., SENARIS, R., REEH, P.,  
1448 PEREZ-GARCIA, M. T., LOPEZ-LOPEZ, J. R., VOETS, T., BELMONTE, C., TALAVERA, K. & VIANA, F.  
1449 2014. TRPA1 channels mediate acute neurogenic inflammation and pain produced by bacterial  
1450 endotoxins. *Nat Commun*, 5, 3125.
- 1451 MURDOCH, C. C., ESPENSCHIED, S. T., MATTY, M. A., MUELLER, O., TOBIN, D. M. & RAWLS, J. F. 2019.  
1452 Intestinal Serum amyloid A suppresses systemic neutrophil activation and bactericidal activity in  
1453 response to microbiota colonization. *PLoS Pathog*, 15, e1007381.
- 1454 NAGEL, G., SZELLAS, T., HUHN, W., KATERIYA, S., ADEISHVILI, N., BERTHOLD, P., OLLIG, D., HEGEMANN, P.  
1455 & BAMBERG, E. 2003. Channelrhodopsin-2, a directly light-gated cation-selective membrane  
1456 channel. *Proc Natl Acad Sci U S A*, 100, 13940-5.
- 1457 NAKAMURA, Y., TAKANO, T., YASUIKE, M., SAKAI, T., MATSUYAMA, T. & SANO, M. 2013. Comparative  
1458 genomics reveals that a fish pathogenic bacterium *Edwardsiella tarda* has acquired the locus of  
1459 enterocyte effacement (LEE) through horizontal gene transfer. *BMC Genomics*, 14, 642.
- 1460 NAUMANN, E. A., FITZGERALD, J. E., DUNN, T. W., RIHEL, J., SOMPOLINSKY, H. & ENGERT, F. 2016. From  
1461 Whole-Brain Data to Functional Circuit Models: The Zebrafish Optomotor Response. *Cell*, 167,  
1462 947-960 e20.
- 1463 NILIUS, B., PRENEN, J. & OWSIANIK, G. 2011. Irritating channels: the case of TRPA1. *J Physiol*, 589, 1543-  
1464 9.
- 1465 NOZAWA, K., KAWABATA-SHODA, E., DOIHARA, H., KOJIMA, R., OKADA, H., MOCHIZUKI, S., SANO, Y.,  
1466 INAMURA, K., MATSUSHIME, H., KOIZUMI, T., YOKOYAMA, T. & ITO, H. 2009. TRPA1 regulates  
1467 gastrointestinal motility through serotonin release from enterochromaffin cells. *Proc Natl Acad*  
1468 *Sci U S A*, 106, 3408-13.

- 1469 OBATA, Y., CASTANO, A., BOEING, S., BON-FRAUCHES, A. C., FUNG, C., FALLESEN, T., DE AGUERO, M. G.,  
1470 YILMAZ, B., LOPES, R., HUSEYNOVA, A., HORSWELL, S., MARADANA, M. R., BOESMANS, W.,  
1471 VANDEN BERGHE, P., MURRAY, A. J., STOCKINGER, B., MACPHERSON, A. J. & PACHNIS, V. 2020.  
1472 Neuronal programming by microbiota regulates intestinal physiology. *Nature*, 578, 284-289.
- 1473 PAN, H. & GERSHON, M. D. 2000. Activation of intrinsic afferent pathways in submucosal ganglia of the  
1474 guinea pig small intestine. *J Neurosci*, 20, 3295-309.
- 1475 PAN, Y. A., CHOY, M., PROBER, D. A. & SCHIER, A. F. 2012. Robo2 determines subtype-specific axonal  
1476 projections of trigeminal sensory neurons. *Development*, 139, 591-600.
- 1477 PARK, S. B., AOKI, T. & JUNG, T. S. 2012. Pathogenesis of and strategies for preventing *Edwardsiella tarda*  
1478 infection in fish. *Vet Res*, 43, 67.
- 1479 PHAM, L. N., KANTHER, M., SEMOVA, I. & RAWLS, J. F. 2008. Methods for generating and colonizing  
1480 gnotobiotic zebrafish. *Nat Protoc*, 3, 1862-75.
- 1481 PROBER, D. A., ZIMMERMAN, S., MYERS, B. R., MCDERMOTT, B. M., JR., KIM, S. H., CARON, S., RIHEL, J.,  
1482 SOLNICA-KREZEL, L., JULIUS, D., HUDSPETH, A. J. & SCHIER, A. F. 2008. Zebrafish TRPA1 channels  
1483 are required for chemosensation but not for thermosensation or mechanosensory hair cell  
1484 function. *J Neurosci*, 28, 10102-10.
- 1485 PUYSKENS, A., STINN, A., VAN DER VAART, M., KREUCHWIG, A., PROTZE, J., PEI, G., KLEMM, M., GUHLICH-  
1486 BORNHOF, U., HURWITZ, R., KRISHNAMOORTHY, G., SCHAAF, M., KRAUSE, G., MEIJER, A. H.,  
1487 KAUFMANN, S. H. E. & MOURA-ALVES, P. 2020. Aryl Hydrocarbon Receptor Modulation by  
1488 Tuberculosis Drugs Impairs Host Defense and Treatment Outcomes. *Cell Host Microbe*, 27, 238-  
1489 248 e7.
- 1490 QU, Z. D., THACKER, M., CASTELUCCI, P., BAGYANSZKI, M., EPSTEIN, M. L. & FURNESS, J. B. 2008.  
1491 Immunohistochemical analysis of neuron types in the mouse small intestine. *Cell Tissue Res*, 334,  
1492 147-61.
- 1493 RANDLETT, O., WEE, C. L., NAUMANN, E. A., NNAEMEKA, O., SCHOPPIK, D., FITZGERALD, J. E., PORTUGUES,  
1494 R., LACOSTE, A. M., RIEGLER, C., ENGERT, F. & SCHIER, A. F. 2015. Whole-brain activity mapping  
1495 onto a zebrafish brain atlas. *Nat Methods*, 12, 1039-46.
- 1496 RAWLS, J. F., MAHOWALD, M. A., LEY, R. E. & GORDON, J. I. 2006. Reciprocal gut microbiota transplants  
1497 from zebrafish and mice to germ-free recipients reveal host habitat selection. *Cell*, 127, 423-33.
- 1498 ROACH, G., HEATH WALLACE, R., CAMERON, A., EMRAH OZEL, R., HONGAY, C. F., BARAL, R., ANDREESCU,  
1499 S. & WALLACE, K. N. 2013. Loss of *ascl1a* prevents secretory cell differentiation within the  
1500 zebrafish intestinal epithelium resulting in a loss of distal intestinal motility. *Dev Biol*, 376, 171-86.
- 1501 ROAGER, H. M. & LICHT, T. R. 2018. Microbial tryptophan catabolites in health and disease. *Nat Commun*,  
1502 9, 3294.
- 1503 ROBERTS, G. P., LARRAUFIE, P., RICHARDS, P., KAY, R. G., GALVIN, S. G., MIEDZYBRODZKA, E. L., LEITER, A.,  
1504 LI, H. J., GLASS, L. L., MA, M. K. L., LAM, B., YEO, G. S. H., SCHARFMANN, R., CHIARUGI, D.,  
1505 HARDWICK, R. H., REIMANN, F. & GRIBBLE, F. M. 2019. Comparison of Human and Murine  
1506 Enteroendocrine Cells by Transcriptomic and Peptidomic Profiling. *Diabetes*, 68, 1062-1072.
- 1507 ROLIG, A. S., MITTGE, E. K., GANZ, J., TROLL, J. V., MELANCON, E., WILES, T. J., ALLIGOOD, K., STEPHENS,  
1508 W. Z., EISEN, J. S. & GUILLEMIN, K. 2017. The enteric nervous system promotes intestinal health  
1509 by constraining microbiota composition. *PLoS Biol*, 15, e2000689.
- 1510 SCHINDELIN, J., ARGANDA-CARRERAS, I., FRISE, E., KAYNIG, V., LONGAIR, M., PIETZSCH, T., PREIBISCH, S.,  
1511 RUEDEN, C., SAALFELD, S., SCHMID, B., TINEVEZ, J. Y., WHITE, D. J., HARTENSTEIN, V., ELICEIRI, K.,  
1512 TOMANCAK, P. & CARDONA, A. 2012. Fiji: an open-source platform for biological-image analysis.  
1513 *Nat Methods*, 9, 676-82.
- 1514 SMITH, T. 1897. A Modification of the Method for Determining the Production of Indol by Bacteria. *J Exp*  
1515 *Med*, 2, 543-7.

- 1516 SRINIVASA RAO, P. S., LIM, T. M. & LEUNG, K. Y. 2003. Functional genomics approach to the identification  
1517 of virulence genes involved in *Edwardsiella tarda* pathogenesis. *Infect Immun*, 71, 1343-51.
- 1518 STEPHENS, W. Z., BURNS, A. R., STAGAMAN, K., WONG, S., RAWLS, J. F., GUILLEMIN, K. & BOHANNAN, B.  
1519 J. 2016. The composition of the zebrafish intestinal microbial community varies across  
1520 development. *ISME J*, 10, 644-54.
- 1521 SUN, E. W., MARTIN, A. M., WATTCHOW, D. A., DE FONTGALLAND, D., RABBITT, P., HOLLINGTON, P.,  
1522 YOUNG, R. L. & KEATING, D. J. 2019a. Metformin Triggers PYY Secretion in Human Gut Mucosa. *J*  
1523 *Clin Endocrinol Metab*, 104, 2668-2674.
- 1524 SUN, Y., TANG, L., LIU, Y., HU, C., ZHOU, B., LAM, P. K. S., LAM, J. C. W. & CHEN, L. 2019b. Activation of aryl  
1525 hydrocarbon receptor by dioxin directly shifts gut microbiota in zebrafish. *Environ Pollut*, 255,  
1526 113357.
- 1527 SYMONDS, E. L., PEIRIS, M., PAGE, A. J., CHIA, B., DOGRA, H., MASDING, A., GALANAKIS, V., ATIBA, M.,  
1528 BULMER, D., YOUNG, R. L. & BLACKSHAW, L. A. 2015. Mechanisms of activation of mouse and  
1529 human enteroendocrine cells by nutrients. *Gut*, 64, 618-26.
- 1530 TARAVIRAS, S., MARCOS-GUTIERREZ, C. V., DURBEC, P., JANI, H., GRIGORIOU, M., SUKUMARAN, M.,  
1531 WANG, L. C., HYNES, M., RAISMAN, G. & PACHNIS, V. 1999. Signalling by the RET receptor tyrosine  
1532 kinase and its role in the development of the mammalian enteric nervous system. *Development*,  
1533 126, 2785-97.
- 1534 TORNINI, V. A., THOMPSON, J. D., ALLEN, R. L. & POSS, K. D. 2017. Live fate-mapping of joint-associated  
1535 fibroblasts visualizes expansion of cell contributions during zebrafish fin regeneration.  
1536 *Development*, 144, 2889-2895.
- 1537 TRAVAGLI, R. A. & ANSELMINI, L. 2016. Vagal neurocircuitry and its influence on gastric motility. *Nat Rev*  
1538 *Gastroenterol Hepatol*, 13, 389-401.
- 1539 TRAVAGLI, R. A., HERMANN, G. E., BROWNING, K. N. & ROGERS, R. C. 2006. Brainstem circuits regulating  
1540 gastric function. *Annu Rev Physiol*, 68, 279-305.
- 1541 TSENG, Q., DUCHEMIN-PELLETIER, E., DESHIERE, A., BALLAND, M., GUILLOU, H., FILHOL, O. & THERY, M.  
1542 2012. Spatial organization of the extracellular matrix regulates cell-cell junction positioning. *Proc*  
1543 *Natl Acad Sci U S A*, 109, 1506-11.
- 1544 ULHAQ, Z. S. & KISHIDA, M. 2018. Brain Aromatase Modulates Serotonergic Neuron by Regulating  
1545 Serotonin Levels in Zebrafish Embryos and Larvae. *Front Endocrinol (Lausanne)*, 9, 230.
- 1546 VENKATESH, M., MUKHERJEE, S., WANG, H., LI, H., SUN, K., BENECHET, A. P., QIU, Z., MAHER, L., REDINBO,  
1547 M. R., PHILLIPS, R. S., FLEET, J. C., KORTAGERE, S., MUKHERJEE, P., FASANO, A., LE VEN, J.,  
1548 NICHOLSON, J. K., DUMAS, M. E., KHANNA, K. M. & MANI, S. 2014. Symbiotic bacterial metabolites  
1549 regulate gastrointestinal barrier function via the xenobiotic sensor PXR and Toll-like receptor 4.  
1550 *Immunity*, 41, 296-310.
- 1551 VINCENT, A. D., WANG, X. Y., PARSONS, S. P., KHAN, W. I. & HUIZINGA, J. D. 2018. Abnormal absorptive  
1552 colonic motor activity in germ-free mice is rectified by butyrate, an effect possibly mediated by  
1553 mucosal serotonin. *Am J Physiol Gastrointest Liver Physiol*, 315, G896-G907.
- 1554 YANG, M., LV, Y., XIAO, J., WU, H., ZHENG, H., LIU, Q., ZHANG, Y. & WANG, Q. 2012. *Edwardsiella*  
1555 comparative phylogenomics reveal the new intra/inter-species taxonomic relationships, virulence  
1556 evolution and niche adaptation mechanisms. *PLoS One*, 7, e36987.
- 1557 YANG, Y., WANG, S., KOBAYASHI, K., HAO, Y., KANDA, H., KONDO, T., KOGURE, Y., YAMANAKA, H.,  
1558 YAMAMOTO, S., LI, J., MIWA, H., NOGUCHI, K. & DAI, Y. 2019. TRPA1-expressing lamina propria  
1559 mesenchymal cells regulate colonic motility. *JCI Insight*, 4.
- 1560 YANO, J. M., YU, K., DONALDSON, G. P., SHASTRI, G. G., ANN, P., MA, L., NAGLER, C. R., ISMAGILOV, R. F.,  
1561 MAZMANIAN, S. K. & HSIAO, E. Y. 2015. Indigenous bacteria from the gut microbiota regulate host  
1562 serotonin biosynthesis. *Cell*, 161, 264-76.

- 1563 YE, L., MUELLER, O., BAGWELL, J., BAGNAT, M., LIDDLE, R. A. & RAWLS, J. F. 2019. High fat diet induces  
1564 microbiota-dependent silencing of enteroendocrine cells. *Elife*, 8.
- 1565 YUE, C., JI, C., ZHANG, H., ZHANG, L. W., TONG, J., JIANG, Y. & CHEN, T. 2017. Protective effects of folic  
1566 acid on PM2.5-induced cardiac developmental toxicity in zebrafish embryos by targeting AhR and  
1567 Wnt/beta-catenin signal pathways. *Environ Toxicol*, 32, 2316-2322.
- 1568 ZELANTE, T., IANNITTI, R. G., CUNHA, C., DE LUCA, A., GIOVANNINI, G., PIERACCINI, G., ZECCHI, R.,  
1569 D'ANGELO, C., MASSI-BENEDETTI, C., FALLARINO, F., CARVALHO, A., PUC CETTI, P. & ROMANI, L.  
1570 2013. Tryptophan catabolites from microbiota engage aryl hydrocarbon receptor and balance  
1571 mucosal reactivity via interleukin-22. *Immunity*, 39, 372-85.
- 1572 ZELKAS, L., RAGHUPATHI, R., LUMSDEN, A. L., MARTIN, A. M., SUN, E., SPENCER, N. J., YOUNG, R. L. &  
1573 KEATING, D. J. 2015. Serotonin-secreting enteroendocrine cells respond via diverse mechanisms  
1574 to acute and chronic changes in glucose availability. *Nutr Metab (Lond)*, 12, 55.
- 1575

## Main Figures

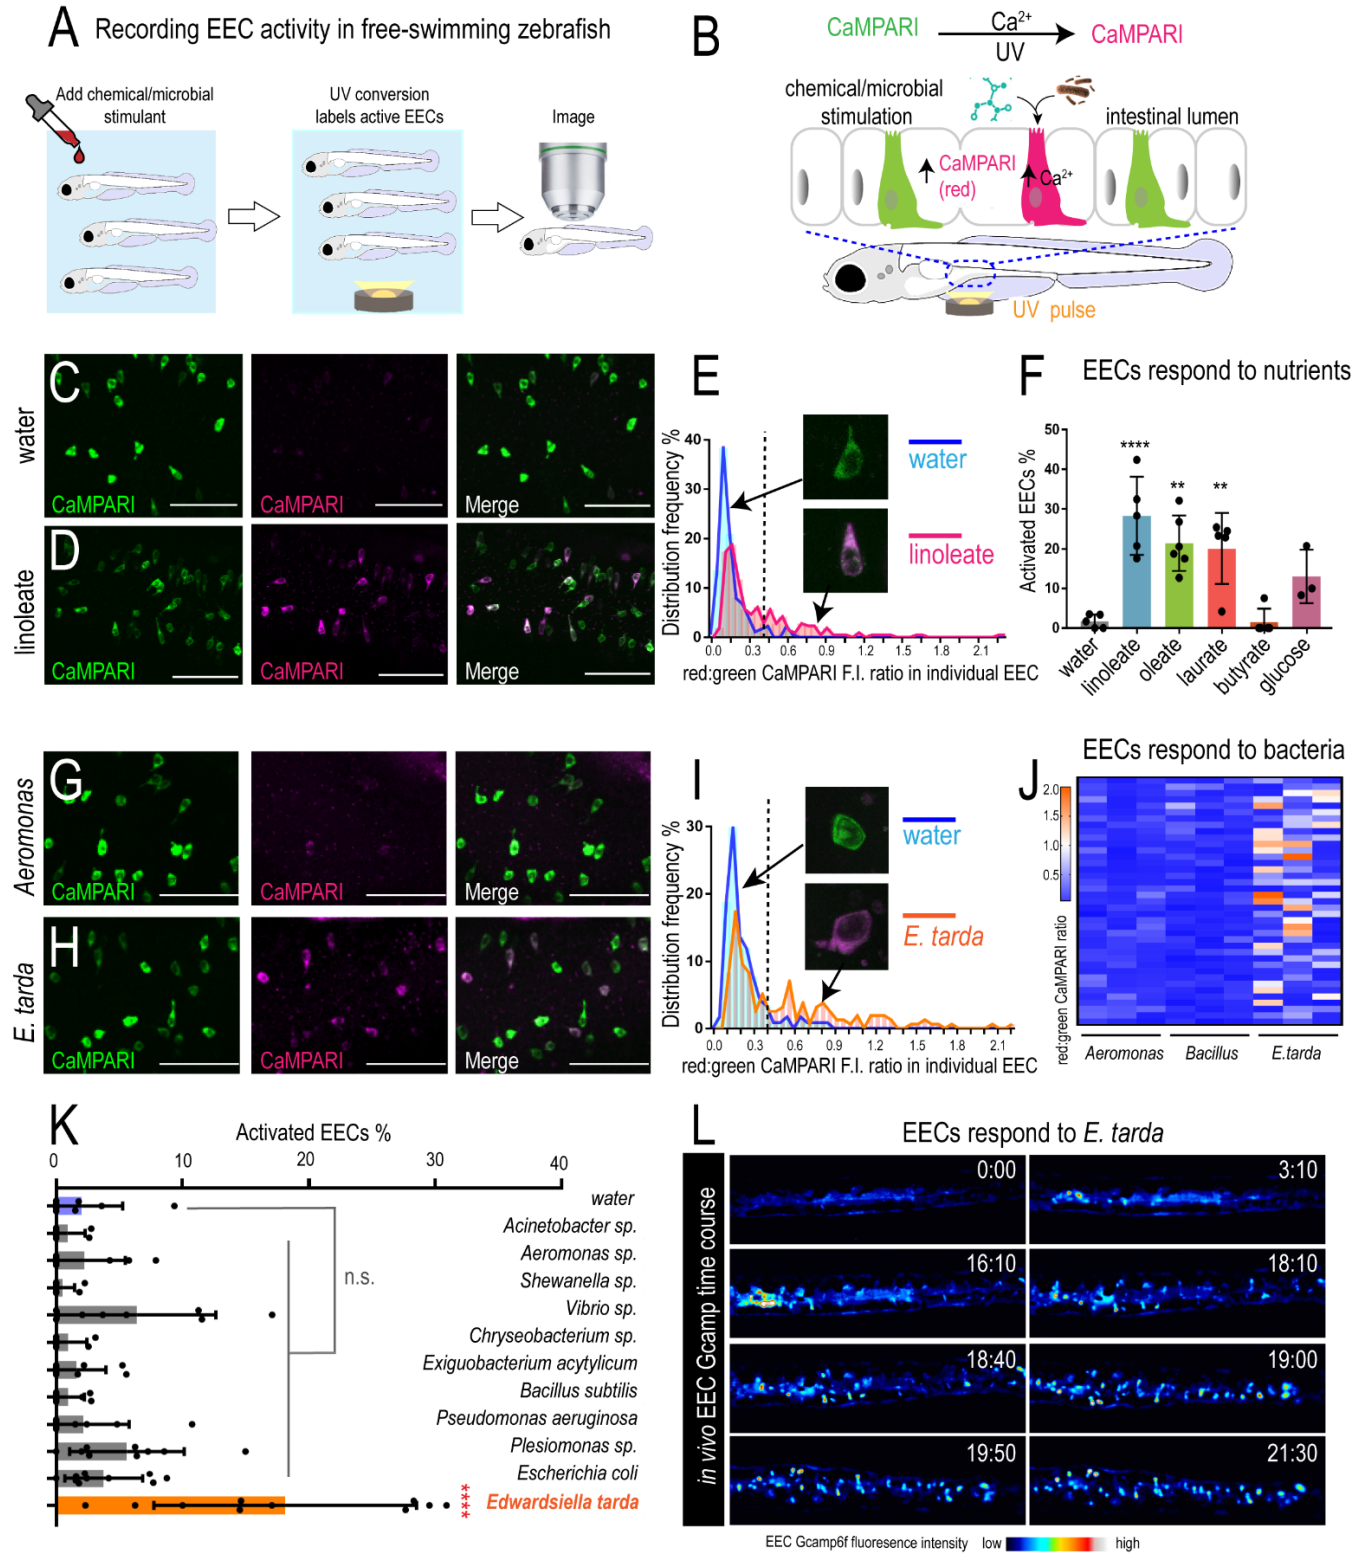

**Figure 1. *E. tarda* activates zebrafish EECs *in vivo*.**

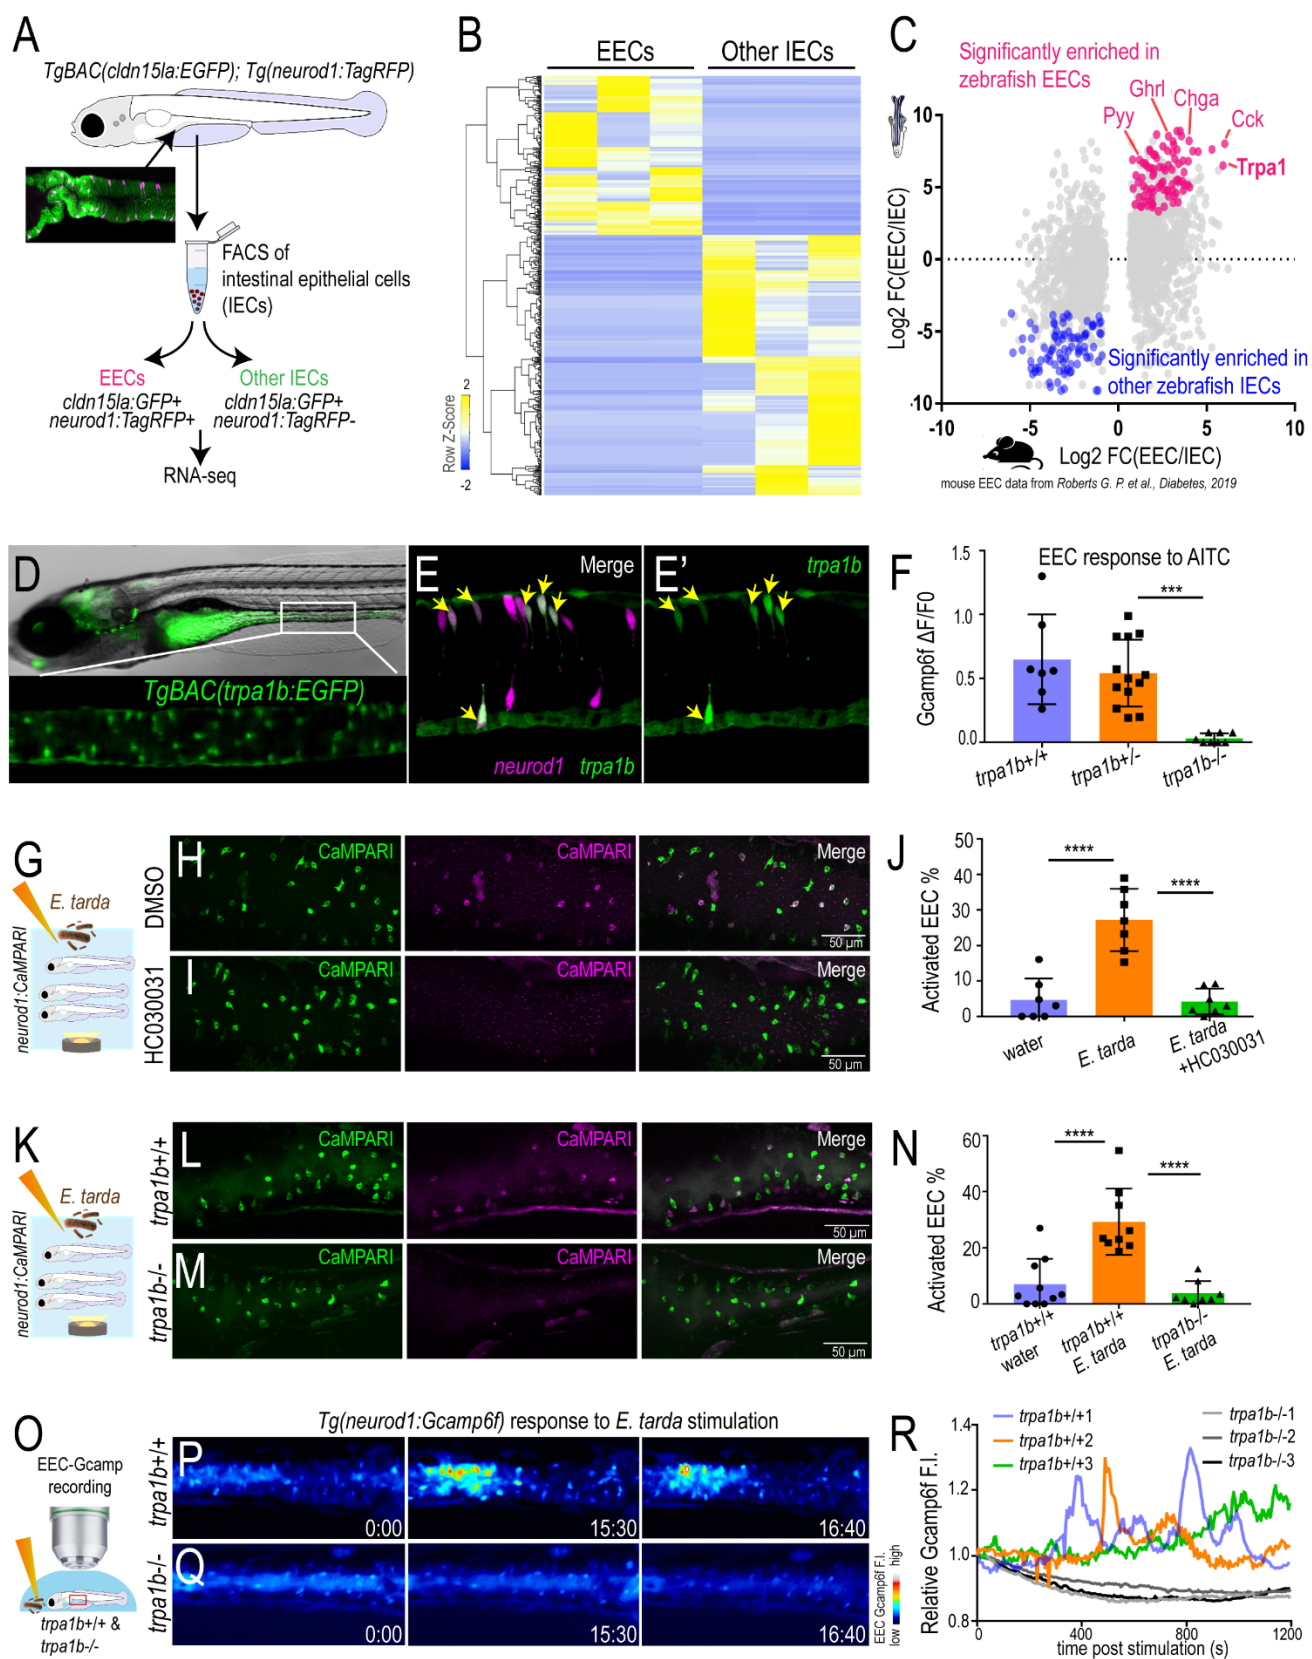

**Figure 2. *E. tarda* activates EECs through Trpa1.**

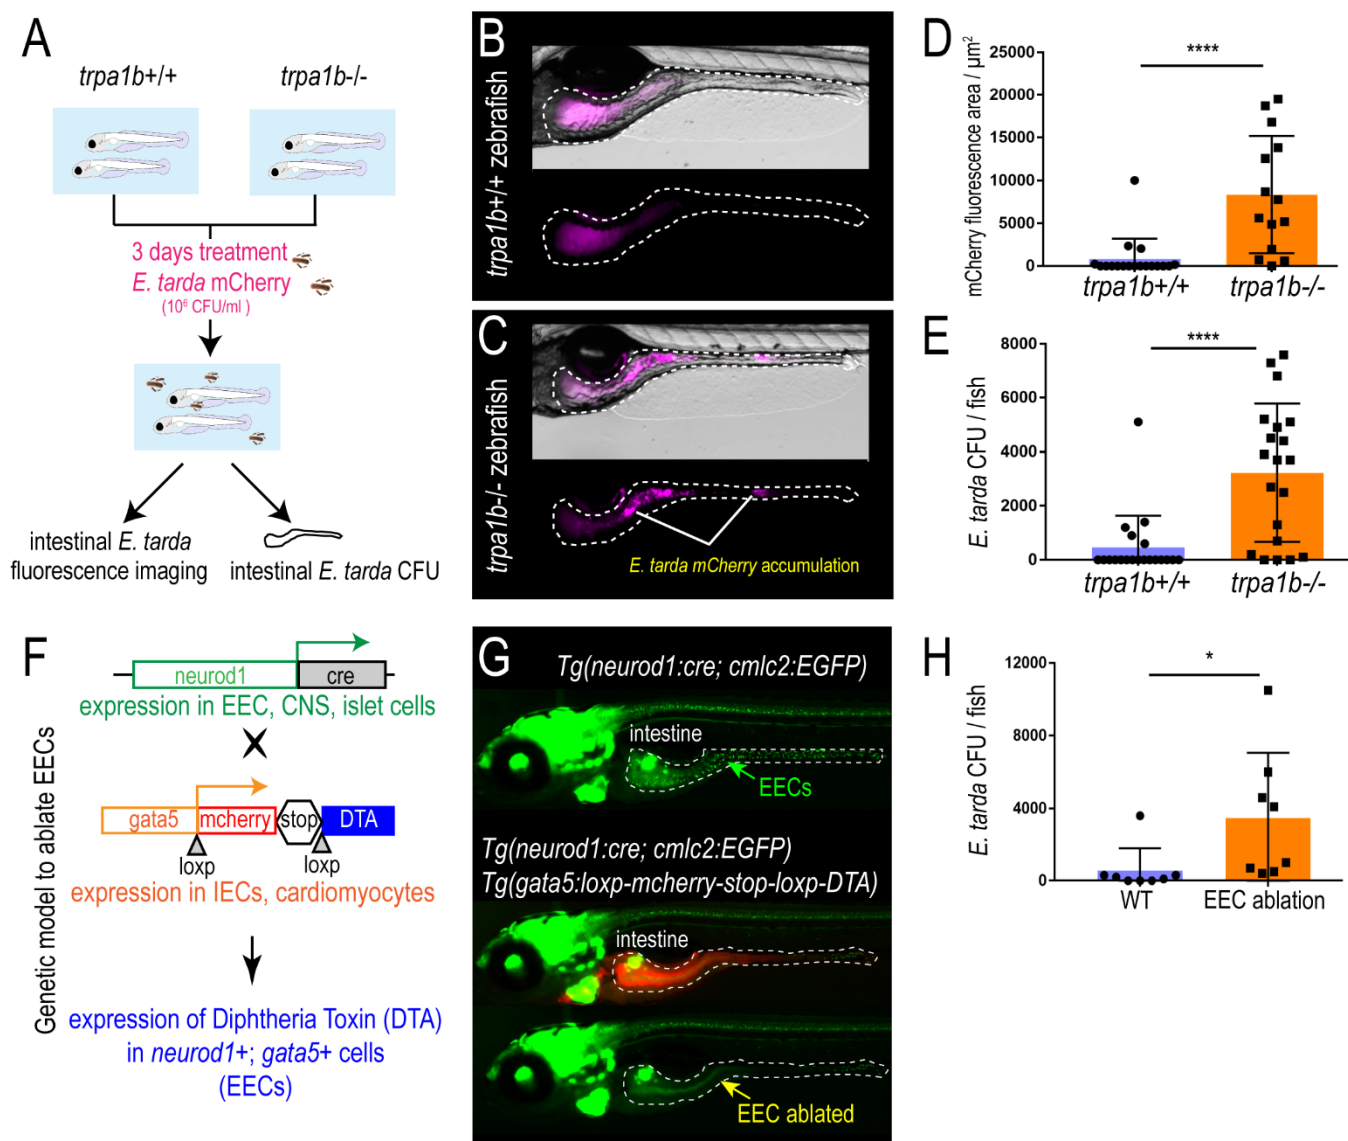

**Figure 3. Activation of EEC Trpa1 signaling facilitates enteric *E. tarda* clearance.**

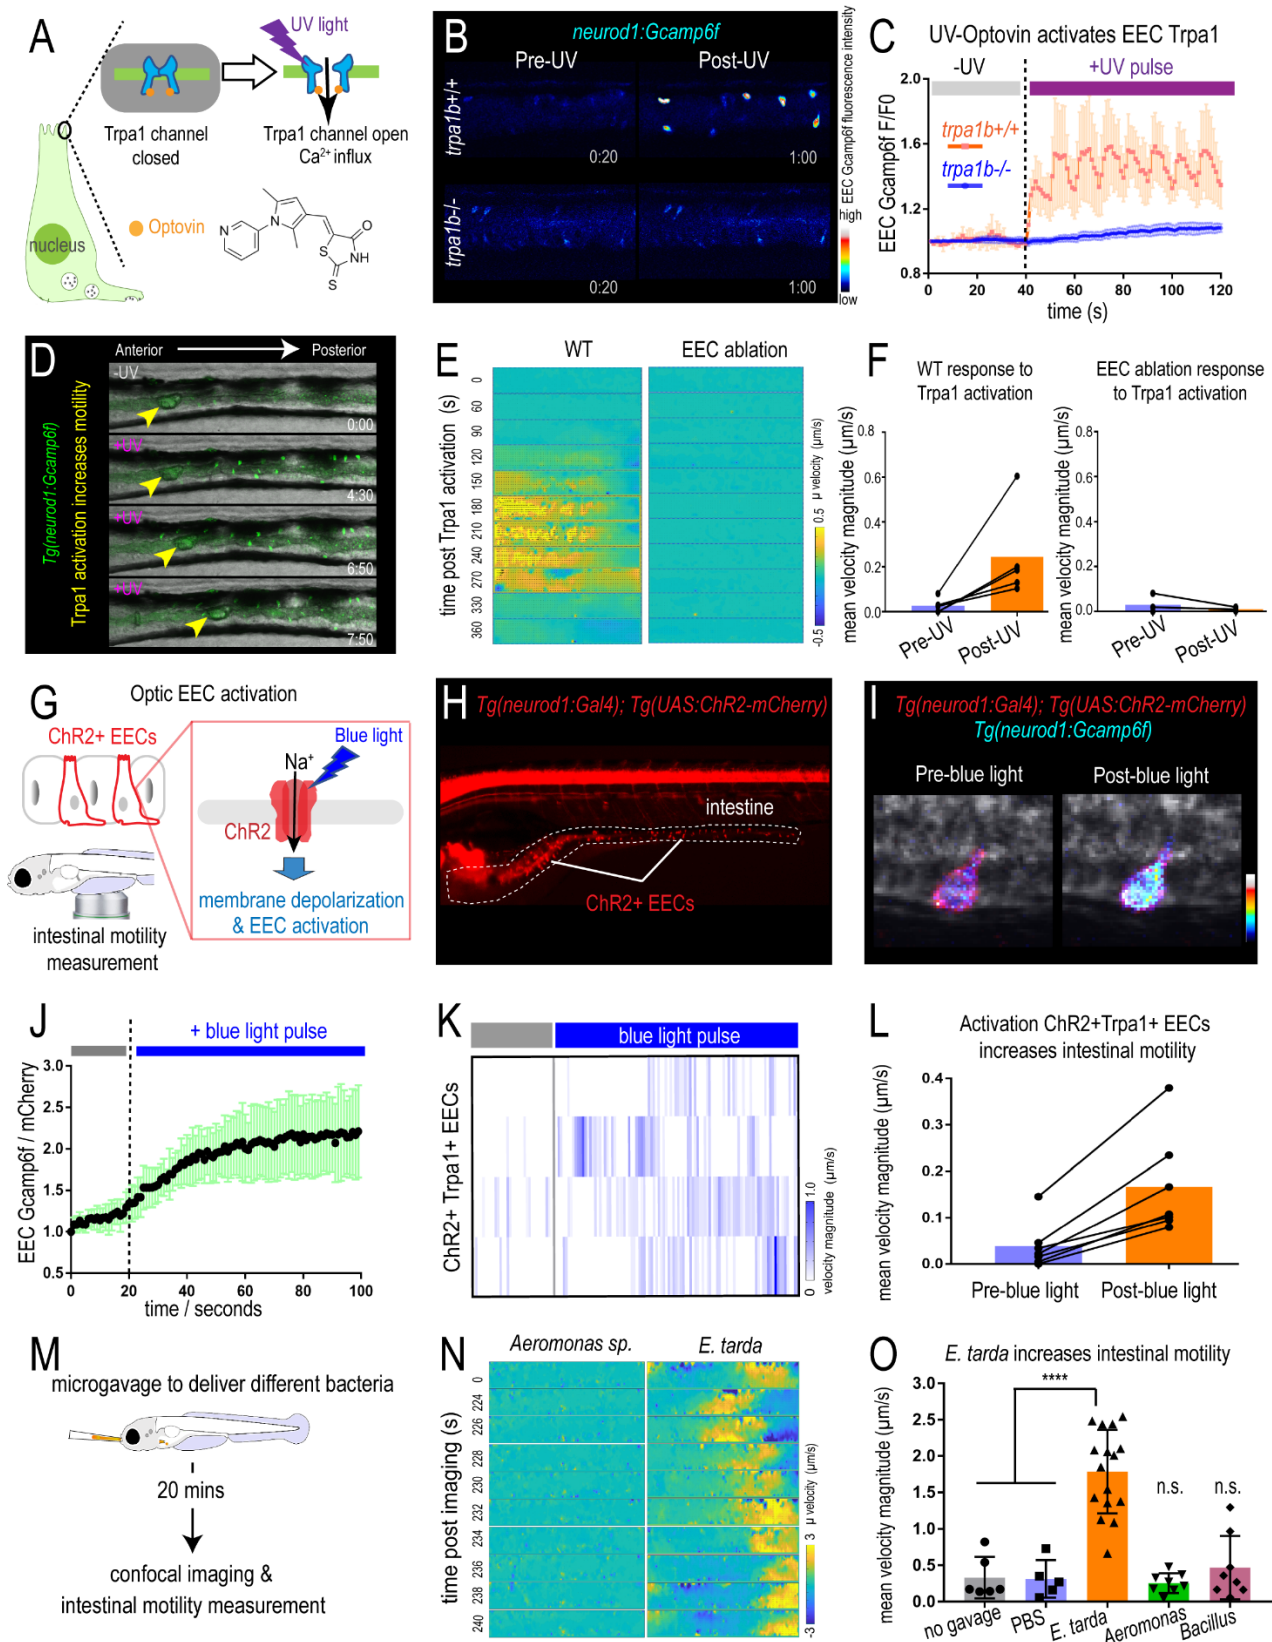

**Figure 4. Activation of EEC Trpa1 signaling promotes intestinal motility.**



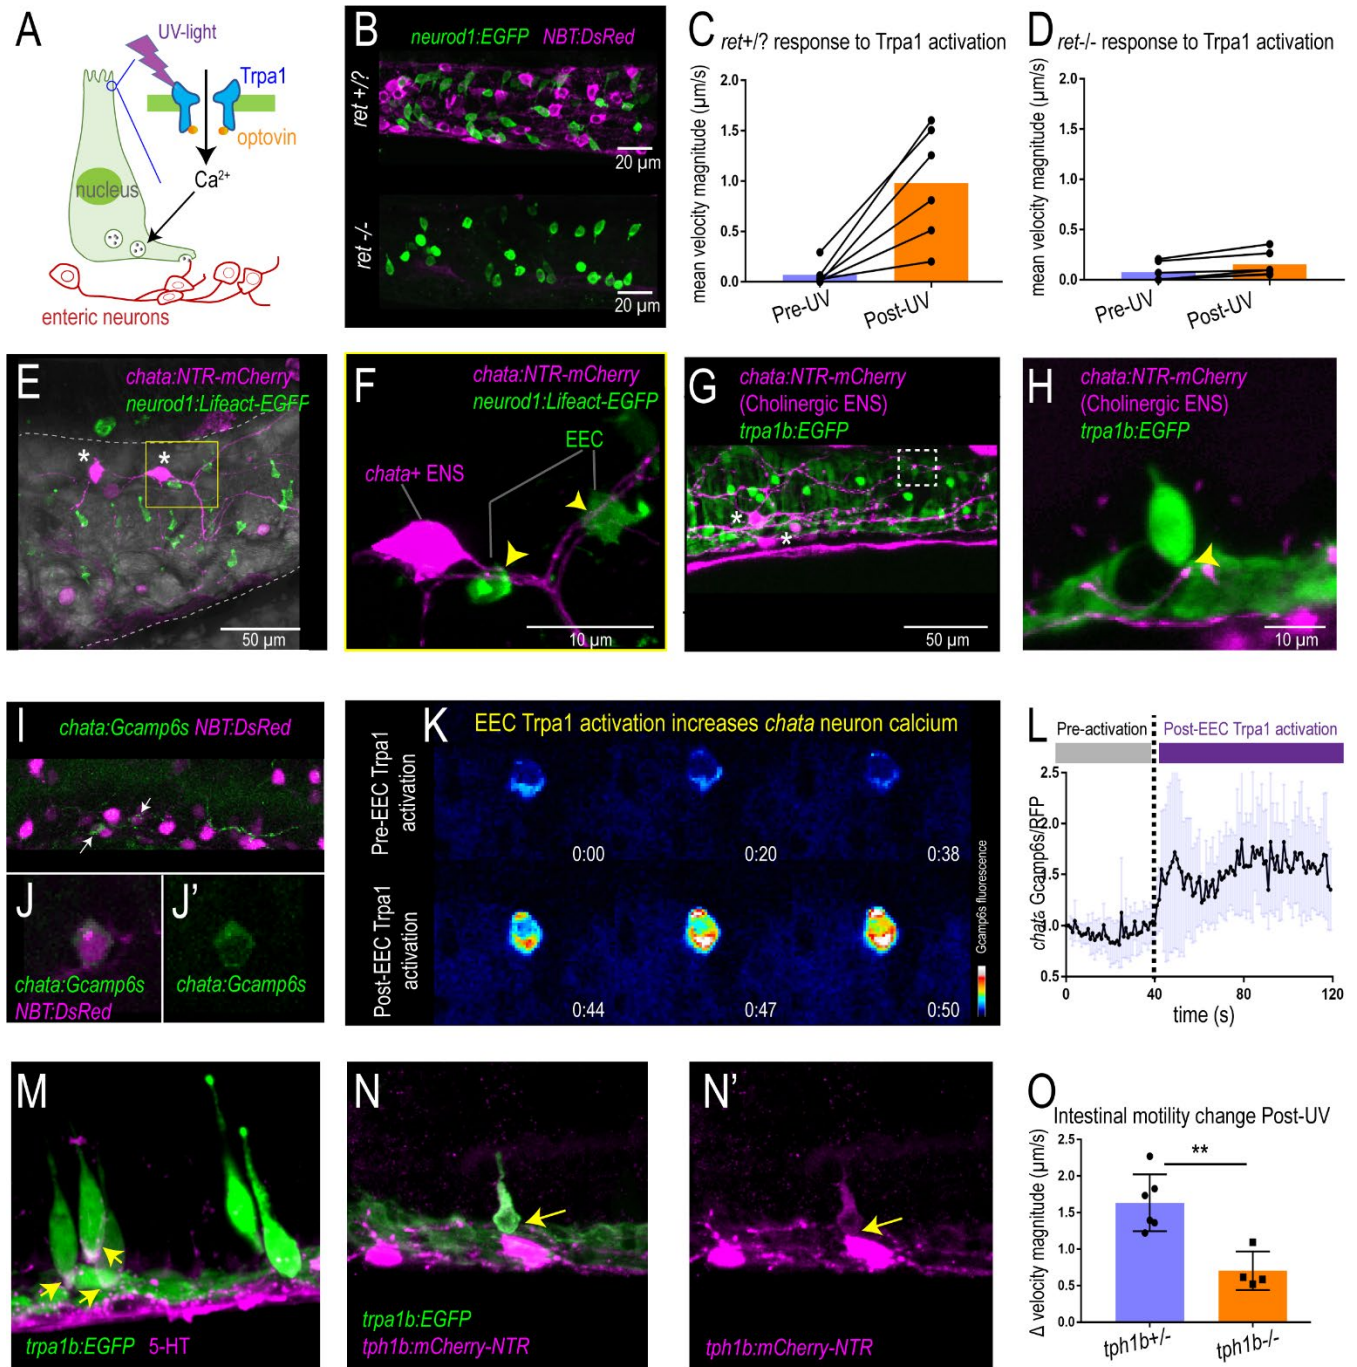

**Figure 5. Activation of EEC Trpa1 signaling activates enteric cholinergic neurons and promotes intestinal motility through 5-HT.**

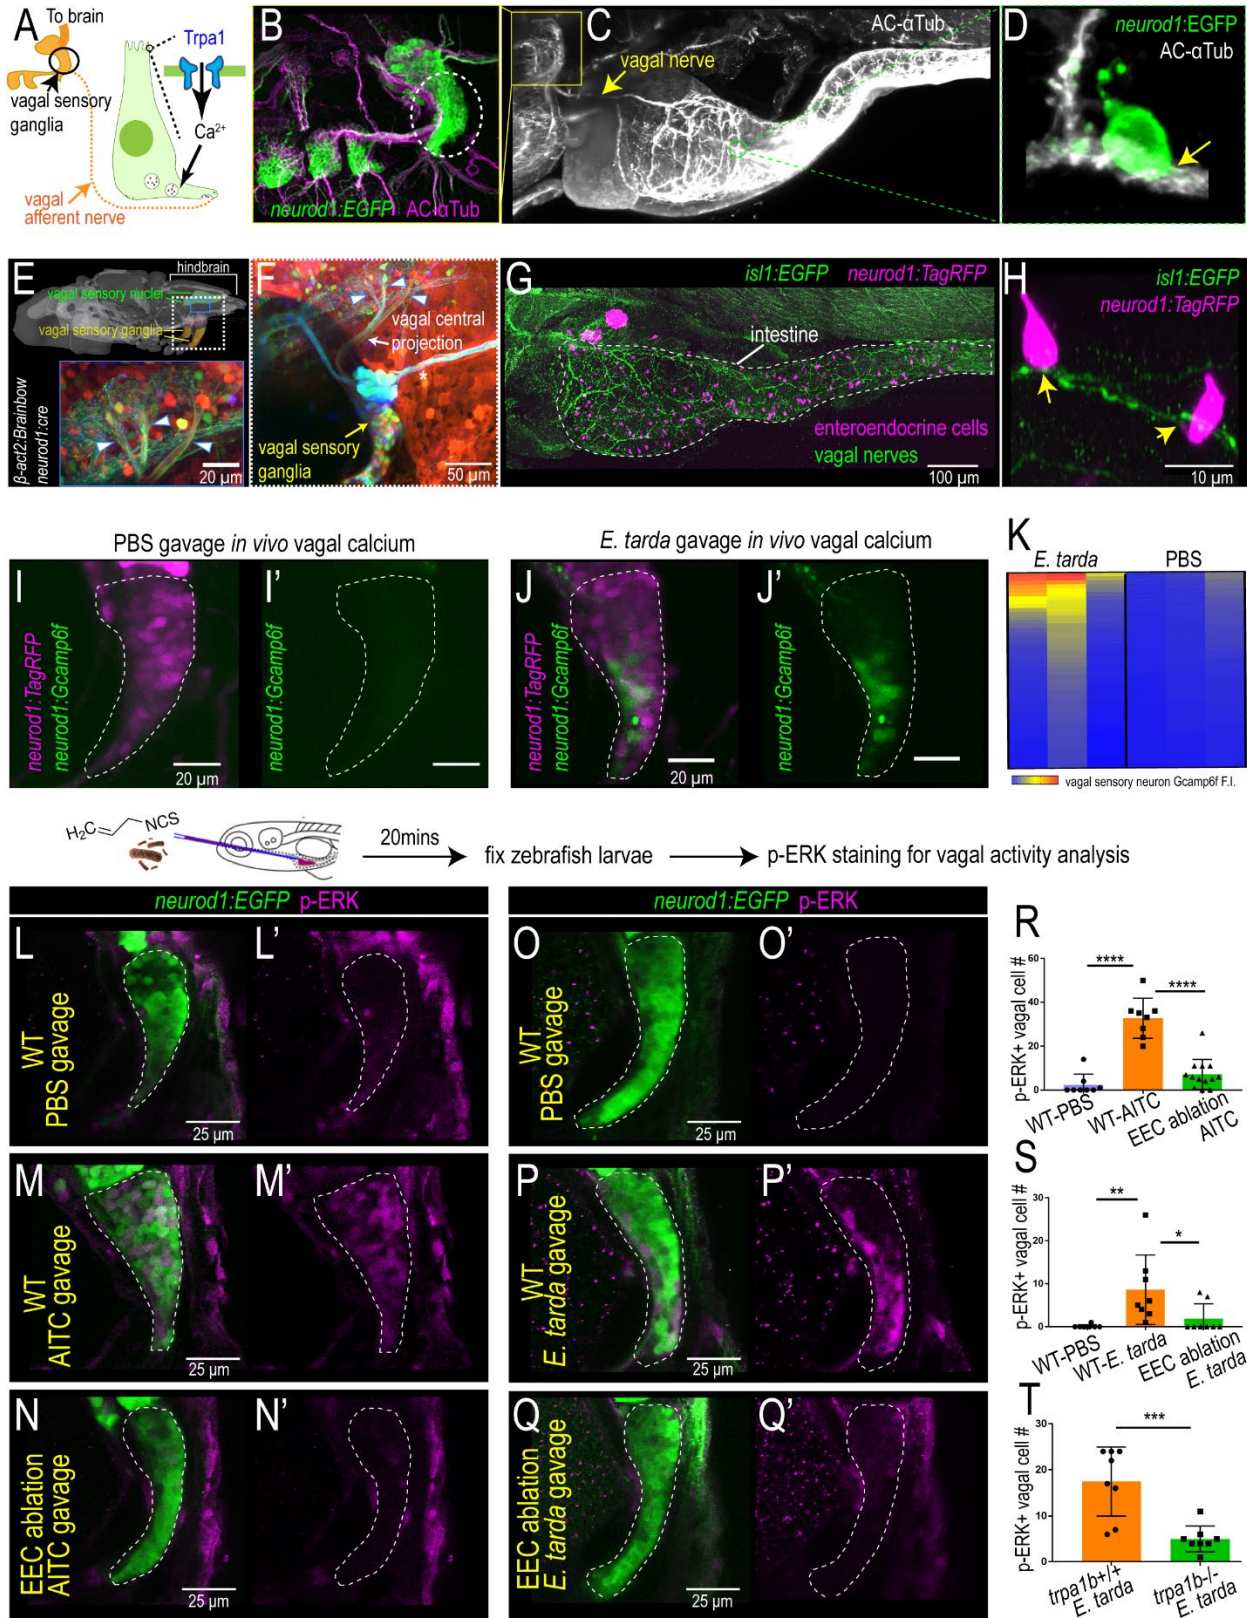

**Figure 6. EEC Trpa1 signaling activates vagal sensory ganglia.**

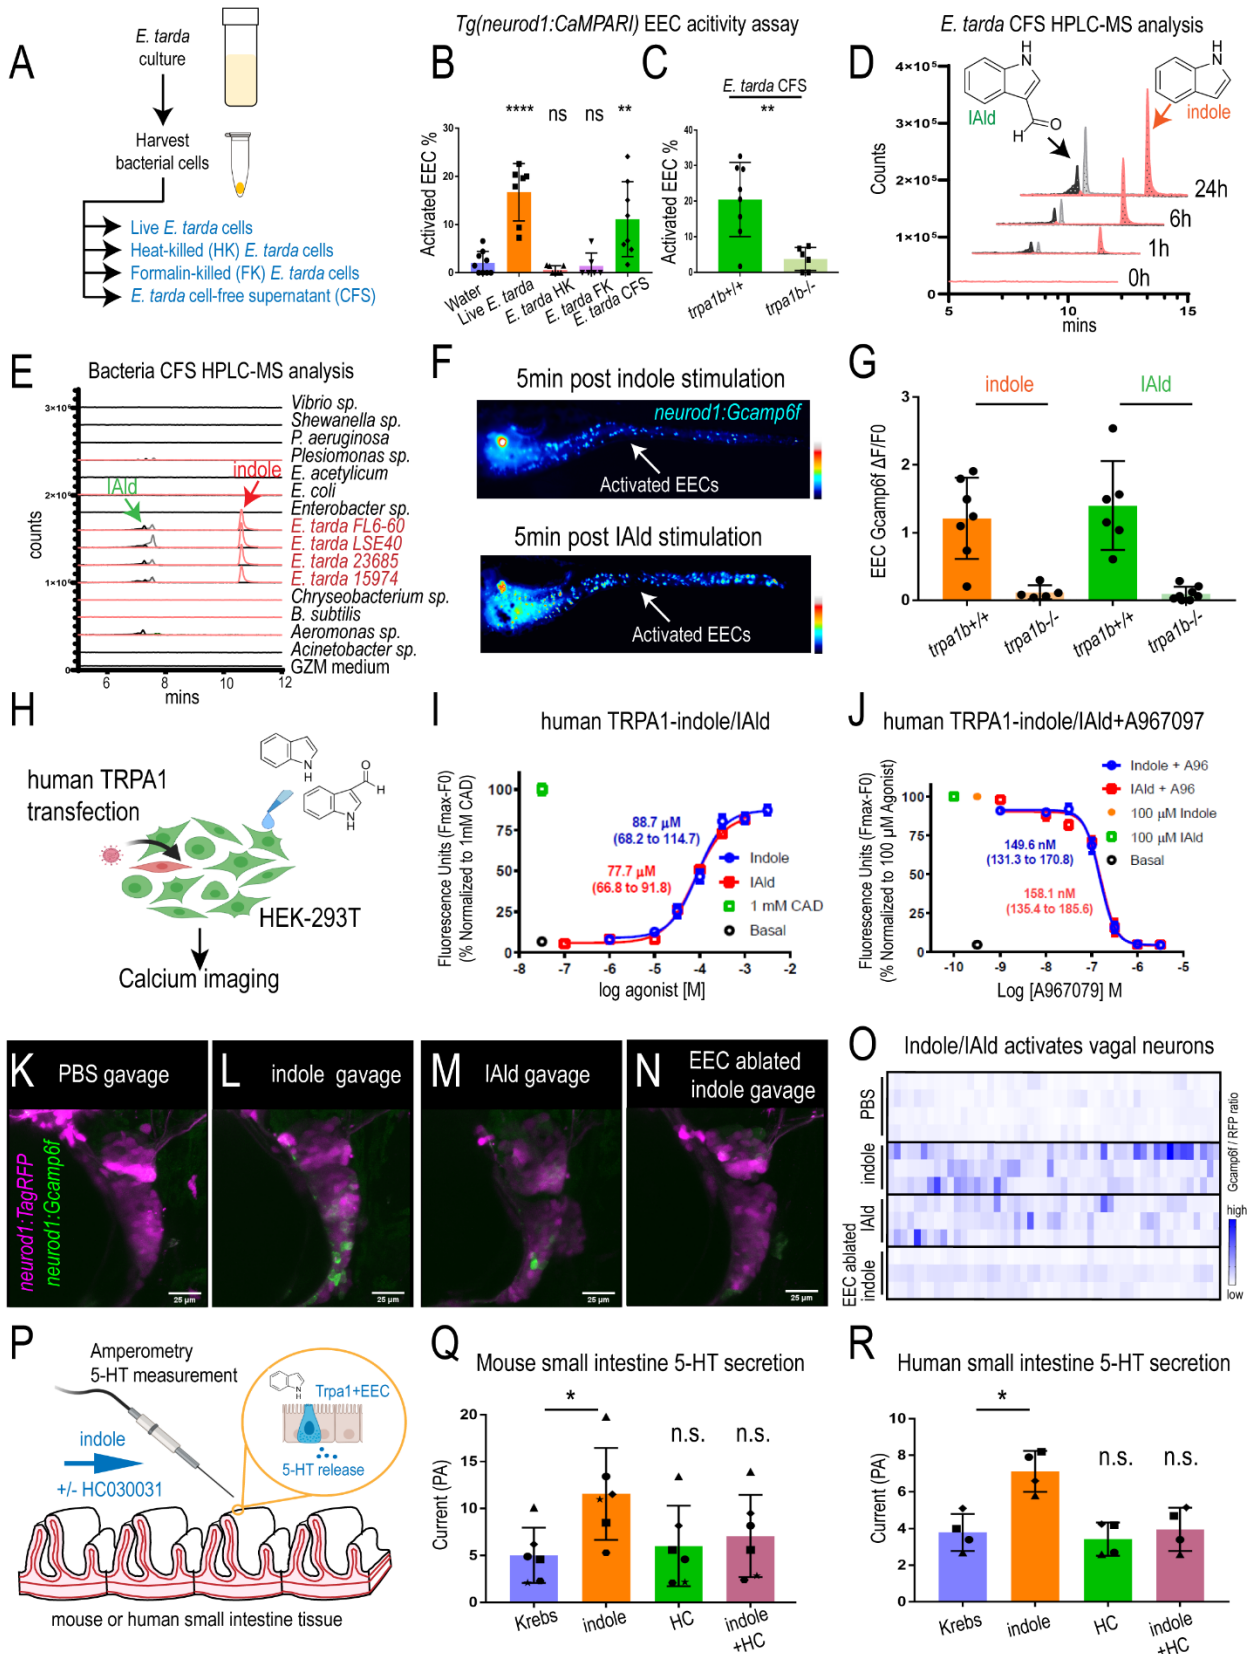

**Figure 7. *E. tarda* derived Tryptophan catabolites activate *Trpa1* and the EEC-vagal pathway.**

## SUPPLEMENTAL FIGURES

**Figure S1. *E. tarda* activates EECs *in vivo*, related to Main Figure 1.** (A) Epifluorescence image of *Tg(neurod1:CaMPARI)* zebrafish without UV conversion. Note that there is no red CaMPARI signal (magenta) in A'. (B) Confocal image of intestinal EECs in *Tg(neurod1:CaMPARI)* zebrafish without UV conversion. (C) Epifluorescence image of unstimulated *Tg(neurod1:CaMPARI)* zebrafish post UV conversion. The red CaMPARI signal is apparent in CNS and islets in C'. (D-F') Confocal image of intestinal EECs (D, D'), CNS (E, E') and islets (F, F') in unstimulated *Tg(neurod1:CaMPARI)* zebrafish after UV conversion. (G) Schematic of liver, pancreas and intestine in 6 dpf zebrafish larvae. The intestinal region that is imaged to assess the CaMPARI signal is indicated by a red box. (H-J) Quantification of EEC red:green CaMPARI fluorescence ratio in water- and linoleate-stimulated zebrafish. (K) Schematic of *in vivo* EEC Gcamp recording in response to bacterial stimulation in *Tg(neurod1:Gcamp6f)* zebrafish. (L) Quantification of EEC Gcamp6f fluorescence in response to stimulation by different bacteria. (M) Quantification of EEC Gcamp6f fluorescence before and 20 mins after *E. tarda* administration. (N-O) Fluorescence image of zebrafish intestine in *Tg(neurod1:Gcamp6f)* zebrafish without treatment (N) or 5 hours post *E. tarda* treatment (O). (P) Quantification of EEC Gcamp6f fluorescence in zebrafish without or with *E. tarda* treatment. Student's t-test was used in M and P for statistical analysis. \*  $p < 0.05$ .

**Figure S2. EECs express *trpa1b* and respond to Trpa1 agonist, related to Main Figure 2 and Figure 3.** (A) Normalized counts of *trpa1a* and *trpa1b* gene expression in zebrafish EECs and other IECs from zebrafish EEC RNA-seq data (Table S1). (B) Gel image of PCR product from FACS sorted EECs and other IECs cell population using primers from *trpa1a*, *trpa1b* and *18S*. (C) Epifluorescence image of *trpa1b*<sup>+/+</sup> (left) and *trpa1b*<sup>-/-</sup> (right) *Tg(neurod1:Gcamp6f)* zebrafish before or 2 mins post Trpa1 agonist AITC stimulation. (D) Epifluorescence image of *Tg(neurod1:Gcamp6f)* zebrafish following AITC stimulation with or without Trpa1 antagonist HC030031 treatment. (E) Epifluorescence image of *trpa1a*<sup>+/+</sup> and *trpa1a*<sup>-/-</sup> *Tg(neurod1:Gcamp6f)* zebrafish 2 mins after AITC stimulation. (F) Quantification of EEC Gcamp fluorescence signal in *trpa1a*<sup>+/+</sup>, *trpa1a*<sup>+/-</sup> and *trpa1a*<sup>-/-</sup> zebrafish. (G) Confocal projection of *trpa1b*<sup>+/+</sup> and *trpa1b*<sup>-/-</sup> *Tg(neurod1:CaMPARI)* zebrafish after AITC stimulation and UV light photoconversion. (H) Model of gut bacterial CFU quantification. (I) Quantification of gut bacterial CFU in *trpa1b*<sup>+/+</sup>, *trpa1b*<sup>+/-</sup> and *trpa1b*<sup>-/-</sup> conventionalized zebrafish. (J) Epifluorescence image of WT, *Tg(neurod1:cre)*, *Tg(gata5:RSD)* and *Tg(neurod1:cre); Tg(gata5:RSD)* zebrafish. The EECs in all the groups are labelled by *Tg(neurod1:EGFP)*. Note that *neurod1:EGFP* labelling is largely absent in *Tg(neurod1:cre); Tg(gata5:RSD)* zebrafish indicating EEC ablation. (K) Confocal images of *Tg(neurod1:cre)* (left) and *Tg(neurod1:cre); Tg(gata5:RSD)* (right) zebrafish intestine stained with PYY antibody. Yellow arrows in D indicate PYY<sup>+</sup> EECs. (L) qPCR analysis of EEC marker genes, other IEC marker genes and neuronal genes in WT and EEC-ablated zebrafish. (M) Quantification of zebrafish survival rate when treated with different doses of *E. tarda* FL6-60. (N) Representative image of zebrafish treated with 10<sup>6</sup> CFU/ml or 10<sup>7</sup> CFU/ml *E. tarda*. Note that in the 10<sup>6</sup> CFU/ml treated zebrafish, the majority of the surviving zebrafish do not exhibit gross pathology (top image). While many of the survived zebrafish treated with 10<sup>7</sup> CFU/ml *E. tarda* displayed deflated swim bladder, altered intestinal morphology and ruptured skin (bottom image). (O) Quantification of gut bacterial CFU in WT, *Tg(neurod1:cre)*, *Tg(gata5:RSD)* and *Tg(neurod1:cre); Tg(gata5:RSD)* conventionalized zebrafish. (P) Epifluorescence image of *Tg(gata5:RSD)* and EEC-ablated zebrafish treated with *E. tarda* mCherry for 3 days. (Q) Quantification of *E. tarda* mCherry fluorescence intensity in the intestinal lumen of *Tg(gata5:RSD)* or EEC-ablated zebrafish. One-

way ANOVA with Tukey's post test was used in F, I, L, O and student t-test was used in Q for statistical analysis. n.s. (not significant), \* $p < 0.05$ , \*\* $p < 0.01$ , \*\*\* $p < 0.001$ .

**Figure S3. Activation of EEC Trpa1 signaling promotes intestinal motility, related to Main Figure 4.** (A) Experimental design for activating EEC Trpa1 signaling using Optovin-UV. (B) Confocal image of *Tg(neurod1:Gcamp6f); Tg(neurod1:TagRFP)* zebrafish intestine before (images on the left) and after (images on the right) UV light activation. Yellow arrows indicate the subpopulation of EECs exhibiting increased Gcamp fluorescence following UV activation. (C) Quantification of the EEC Gcamp6f to TagRFP fluorescence ratio before and after UV activation. (D) Schematic of intestinal movement in larval zebrafish. The proximal zebrafish intestine exhibits retrograde movement while mid-intestine and distal intestine exhibit anterograde movement. The imaged and UV light activated intestinal region in the Optovin-UV experiment is indicated by the red box. The  $\mu$  velocity indicates intestinal horizontal movement. A positive value indicates anterograde movement and a negative value indicates retrograde movement. The  $v$  velocity indicates intestinal vertical movement. (E) Quantification of intestinal motility using PIV-LAB velocity analysis before and after UV activation. Note that Optovin-UV induced Trpa1 activation increased  $\mu$  velocity (horizontal movement) more than  $v$  velocity (vertical movement). (F) Confocal image of ChR2+Trpa1+ EECs (yellow circles, top image) and ChR2+Trpa1- EECs (red circles, bottom image) in *TgBAC(trpa1b:EGFP); Tg(neurod1:Gal4); Tg(UAS:ChR2-mCherry)* zebrafish. (G) Quantification of  $\mu$  velocity following blue light activation of ChR2+Trpa1+ or ChR2+Trpa1- EECs. (H) Quantification of mean intestinal velocity magnitude change before and after blue light activation of ChR2+Trpa1- EECs. (I) Quantification of mean intestinal velocity magnitude in response to *E. tarda* gavage in *trpa1b+/+* or *trpa1b/-* zebrafish. Student t-Test was used in I. \*\*\*  $P < 0.001$ .

**Figure S4. The role of the enteric nervous system in EEC Trpa1-induced intestinal motility, related to Main Figure 5.** (A-B) Epifluorescence image of *ret+/+* or *ret+/-* (*ret+/?*, A) and *ret/-* (B) *Tg(NBT:DsRed); Tg(neurod1:EGFP)* zebrafish. The intestines are denoted by white dash lines. (C-D) Epifluorescence image of *ret+/? Tg(neurod1:Gcamp6f)* zebrafish before (C) and 2 mins after AITC stimulation (D). (E-F) Epifluorescence image of *ret/- Tg(neurod1:Gcamp6f)* zebrafish before (E) and 2 mins after AITC stimulation (F). (G) Quantification of *ret+/?* and *ret/-* intestinal  $\mu$  velocity following Optovin-UV-induced Trpa1 activation. (H) Quantification of velocity before and after Optovin-UV-induced Trpa1 activation in *ret+/?* and *ret/-* zebrafish. (I-J) Confocal projection of *sox10+/?* zebrafish intestine stained with Zn12 (I, magenta, ENS labeling) or 2F11 (J, green, EEC labeling). (K-L) Confocal projection of *sox10/-* zebrafish intestine stained with zn-12 (K) or 2F11 (L). (M-N) Quantification of changes in mean intestinal velocity magnitude before and after Optovin-UV activation in *sox10+/?* (M) or *sox10/-* (N) zebrafish. (O-P) Confocal projection of *TgBAC(trpa1b:EGFP)* zebrafish intestine stained with Desmin (myoblast or smooth muscle cell marker, O') or Zn12 (ENS marker, P'). (Q) Confocal image of *TgBAC(trpa1b:EGFP); Tg(NBT:DsRed)* zebrafish intestine. Note in P and Q that both Zn12+ ENS and NBT+ ENS are *trpa1b-*. (R) Confocal image of *TgBAC(chata:Gal4); Tg(UAS:NTR-mCherry); TgBAC(trpa1b:EGFP)* zebrafish intestine. Note that the *chata+* ENS are *trpa1b-*.

**Figure S5. Zebrafish EECs directly communicate with *chata+* ENS, related to Main Figure 5.** (A-B) Confocal projection of 6 dpf (A) and adult (B) *Tg(neurod1:EGFP)* zebrafish intestine stained with the neuronal marker synaptic vesicular protein 2 (SV2, magenta) antibody. (C) Higher magnification view of an EEC that exhibiting a neuropod contacting SV2 labelled neurons in the intestine. Yellow arrow indicates the EEC neuropod is enriched in SV2. (D) Higher magnification

view of an EEC and neuropod in *Tg(neurod1:TagRFP); Tg(neurod1:mitoEOS)* zebrafish. The yellow arrow indicates the EEC neuropod is enriched in mitochondria (green, labelled by *neurod1:mitoEOS*). (E) Confocal projection of *chata+* ENS in *TgBAC(chata:Gal4); Tg(UAS:mCherry-NTR)* zebrafish intestine. Asterisks indicate the *chata+* enteric neuron cell bodies. (F) Higher magnification view of a *chata+* ENS (white arrow in E). The nuclei of this *chata+* enteric neuron is shown on the right. (F') The axon processes of the *chata+* enteric neuron. Note this neuron displays a typical Dogiel type II morphology in which multiple axons project from the cell body. (G) Confocal projection of *chata+* ENS and EECs in *TgBAC(chata:Gal4); Tg(UAS:mCherry-NTR); Tg(neurod1:EGFP)* zebrafish intestine. EECs are labeled as green and *chata+* ENS are labeled as magenta. Asterisks indicate the *chata+* enteric neuron cell bodies. (H) Higher magnification view of the physical connection between EECs and the *chata+* enteric neuron. Yellow arrow indicates an EEC forming a neuropod to contact a *chata+* enteric neuron. (I) Confocal projection of EECs (2F11+, green) and *chata+* ENS (magenta) in *TgBAC(chata:Gal4); Tg(UAS: NTR-mCherry)* zebrafish. An asterisk indicates the *chata+* ENS cell body. (J) Higher magnification view of the connection between EECs and *chata+* ENS fibers. The point where EECs connected with *chata+* nerve fibers are indicated by yellow arrows. (K) Schematic of Optovin-UV experiment in zebrafish that are anatomically disconnected from their CNS. The Optovin-treated zebrafish were mounted and placed on a confocal objective station. Immediately prior to imaging, the head of the mounted zebrafish was quickly removed with a sharp razor blade and imaging was then performed. (L) Quantification of the mean intestinal velocity before and post UV treatment in decapitated zebrafish. (M) Schematic and confocal image shows the *chata+* ENS which is labelled by both *Gcamp6s* and *mCherry* in decapitated *TgBAC(chata:Gcamp6s); Tg(UAS:Gcamp6s); Tg(UAS:NTR-mCherry)* zebrafish. (N) Confocal image shows the *chata+* ENS *Gcamp* fluorescence intensity before and post *Trpa1+* EEC activation by UV light. (O) Quantification of relative *chata+* ENS *Gcamp* fluorescence intensity before and post *Trpa1+* EEC activation. The *Gcamp* fluorescence intensity was normalized to *mCherry* fluorescence. n=12 from 7 zebrafish. (P) Log<sub>2</sub> fold change of presynaptic genes in zebrafish, mouse and human EECs (Table S2). (Q-R) Confocal image and higher magnification view of *TgBAC(trpa1b:EGFP); Tg(tph1b:mCherry-NTR)* zebrafish intestine showing the *tph1b+* (magenta) *trpa1b+* (green). (S) Quantification of *tph1a* and *tph1b* in zebrafish EECs. (T) Quantification of 5-HT+ or *tph1b+* EECs. (U) Quantification of *tph1b+* and *trpa1b+* EECs. Note the majority of *tph1b+* EECs are *trpa1b+*. (V) Quantification of mean intestinal  $\mu$  velocity in unstimulated *tph1b+/-* and *tph1b-/-* zebrafish. Student t-test was used in V.

**Figure S6. Zebrafish vagal sensory nerve innervate the intestine, related to Main Figure 6.**

(A-B) Lightsheet imaging of the right (A) and left (B) side of zebrafish intestine stained with acetylated  $\alpha$ -tubulin antibody (white). (C) Schematic diagram of the Vagal-Brainbow model to label vagal sensory cells using *Tg(neurod1:cre); Tg( $\beta$ act2:Brainbow)* zebrafish. See Vagal-Brainbow projection in Fig. 6F. (D) Confocal image of vagal ganglia in brainbow zebrafish stained with GFP antibody (green). Note that GFP antibody recognizes both YFP+ and CFP+ vagal sensory neurons. Six branches ( $V_i$  to  $V_{vi}$ ) extend from the vagal sensory ganglia and branch  $V_{vi}$  innervates the intestine. (E-E') Confocal image of vagal sensory ganglia in brainbow zebrafish showing that  $V_{vi}$  exits from the ganglia and courses behind the esophagus. (F-G) Confocal image of the proximal (F) and distal (G) intestine in brainbow zebrafish. The vagus nerve (green) innervates both intestinal regions. (H) Confocal image of vagal sensory ganglia in *Tg(isl1:EGFP); Tg(neurod1:TagRFP)* zebrafish. The vagal sensory ganglia is indicated by a yellow circle. The asterisk indicates the posterior lateral line ganglion. Note that *isl1* (green) is expressed in the

vagal sensory ganglia and overlaps with *neurod1* (magenta). (I) Confocal image of intestine in *Tg(isl1:EGFP); Tg(neurod1:TagRFP)* zebrafish. The vagus nerve is labelled by *isl1* (green) and the intestinal EECs are labelled by *neurod1* (magenta). (J) Confocal plane of intestine in *Tg(isl1:EGFP); Tg(neurod1:TagRFP)* zebrafish. Note that the  $V_{vi}$  branch of the vagus nerve is labelled by *isl1* and travels behind the esophagus to innervate the intestine. (K) Schematic of *in vivo* vagal calcium imaging in PBS or AITC gavaged zebrafish. (L) *In vivo* vagal calcium imaging of *Tg(neurod1:TagRFP); Tg(neurod1:Gcamp6f)* zebrafish without gavage, gavaged with PBS or gavaged with AITC.

**Figure S7. *E. tarda* secretes tryptophan catabolites indole and IAld that activate Trpa1, related to Main Figure 7.** (A) Chemical profiles of Trp-Indole derivatives from supernatants of *E. tarda* in nutrient-rich TSB media. (B) Screening of supernatants of *E. tarda* in TSB media. Samples for *E. tarda* in TSB culture were collected at 0, 6, 18, and 24 h. (C) Screening of supernatants of *E. tarda* in TSB media. Abbreviations are as follows: IAld, indole-3-carboxaldehyde; IET, tryptophol; IAM, indole-3-acetamide; IAA, indole-3-acetic acid; IAald, indole-3-acetaldehyde; and IpyA, indole-3-pyruvate. Extracted ions were selected for IAld (m/z 145), IET, (m/z 161), Indole (m/z 117), IAald (m/z 159), IAM (m/z 174), IAA (m/z 175), and IpyA (m/z 203). (D) Chemical profiles of Trp-Indole derivatives from supernatants of various commensal bacteria in TSB medium for 1 day of cultivation. Values represent normalized production of Trp-Indole derivatives based on CFU. (E) Proposed model of *E. tarda* tryptophan catabolism. (F) EEC Gcamp fluorescence intensity in *Tg(neurod1:Gcamp6f)* zebrafish stimulated with different tryptophan catabolites. (G-H) Represented images (G) and quantification (H) of activated EECs in *Tg(neurod1:CaMPARI)* zebrafish that is stimulated with PBS or with CFS from *E. tarda* 23685 and *E. tarda* 15974. (I-J) Indole (I) and IAld (J) stimulation of  $Ca^{2+}$  influx in human TRPA1 expressing HEK-293T cells, measured as fluorescence increase of intracellular Calcium 6 indicator. (K-L) Effects of TRPA1 inhibition using various concentrations of inhibitor A967079, on subsequent  $Ca^{2+}$  influx in response to indole (100  $\mu$ M, G) or, IAld (100  $\mu$ M, H) in human TRPA1 expressing HEK-293T cells. Data are from a representative experiment performed in triplicate and repeated three times. (M-N) Sensitivity of mouse TRPA1 to indole and IAld. (M) Dose-response effects of indole and IAld (EC<sub>50</sub> = 130.7  $\mu$ M, 107.8 – 158.4  $\mu$ M 95% CI for Indole; and, EC<sub>50</sub> = 189.0  $\mu$ M, 132.8 - 268.8  $\mu$ M 95% CI for IAld). Concentration-response data were normalized to 1 mM cinnamaldehyde (CAD), a known TRPA1 agonist. (N) Effects of the Trpa1 inhibitor A967079, on [ $Ca^{2+}$ ]<sub>i</sub> in response to 100  $\mu$ M indole in mouse Trpa1-expressing HEK-293T cells. Cells were treated with A967079 before the addition of indole (100  $\mu$ M). Changes in Calcium 6 fluorescence above baseline (F<sub>max</sub>-F<sub>0</sub>; maximal [ $Ca^{2+}$ ]<sub>i</sub>) are expressed as a function of Trpa1 inhibitor, A967079, concentration (IC<sub>50</sub> = 315.5 nM, 202.3 – 702.3 nM 95% CI for indole). Concentration-response data were normalized to the response elicited by 100  $\mu$ M Indole. Data represent mean  $\pm$  s.e.m. of normalized measures pooled from two experiments, each performed in triplicate.

**Figure S8. Effects of tryptophan catabolites and AhR inhibitor on intestinal motility, related to Main Figure 7.** (A) Experimental model for measuring intestinal motility in response to indole stimulation. (B) EEC Gcamp6f fluorescence (blue line) and changes in intestinal motility (heat map) following indole stimulation. (C) Intestinal  $\mu$  velocity in response to PBS or indole stimulation. (D) Mean intestinal velocity magnitude 0-50s and 200-250s following indole stimulation. (E) Schematic of experiment design in measuring the effects of indole or IAld in vagal ganglia calcium. WT or EEC ablated *Tg(neurod1:Gcamp6f); Tg(neurod1:TagRFP)* zebrafish that were gavaged with indole or IAld. (F) Quantification of the Gcamp6f to TagRFP fluorescence ratio in the whole vagal sensory ganglia in WT or EEC ablated zebrafish 30 mins following indole gavage. (G)

Schematic of experiment design in testing the effects of AhR inhibitors on intestinal *E. tarda* accumulation. (H) Representative image of DMSO or AhR inhibitor CH223191 treated zebrafish that were infected with *E. tarda* expressing mCherry (*E. tarda* mCherry). (I) Quantification of *E. tarda* mCherry fluorescence in DMSO, AhR inhibitor CH223191 or Folic acid treated zebrafish intestine. (J) Schematic of experiment set up to examine the effects of AhR inhibitors in Trpa1<sup>+</sup>EEC induced intestinal motility. (K) Quantification of mean intestinal velocity magnitude in DMSO, CH223191 or Folic acid treated zebrafish before and post UV activation. (L) Quantification of mean intestinal velocity magnitude change in DMSO, CH223191 or Folic acid treated zebrafish up UV-induced Trpa1<sup>+</sup>EEC activation. (M) Schematic of small intestine and colonic regions in 10-week old SPF C57Bl/6 mice that were collected for HPLC-MS analysis. (N) Chemical profiles of Trp-Indole derivatives from colon and small intestine of conventionally-reared mice. Relative amounts of the Trp-metabolites from each mouse was normalized by tissue weight. M1-M3: males. M4-M5: females. Extracted ions were selected for Indole (m/z 117), IAld (m/z 145), and IEt, (m/z 161). One-way ANOVA with Tukey's post test was used in F, I, L. \*\* P<0.01, \*\*\*\* P<0.0001, n.s. not significant.



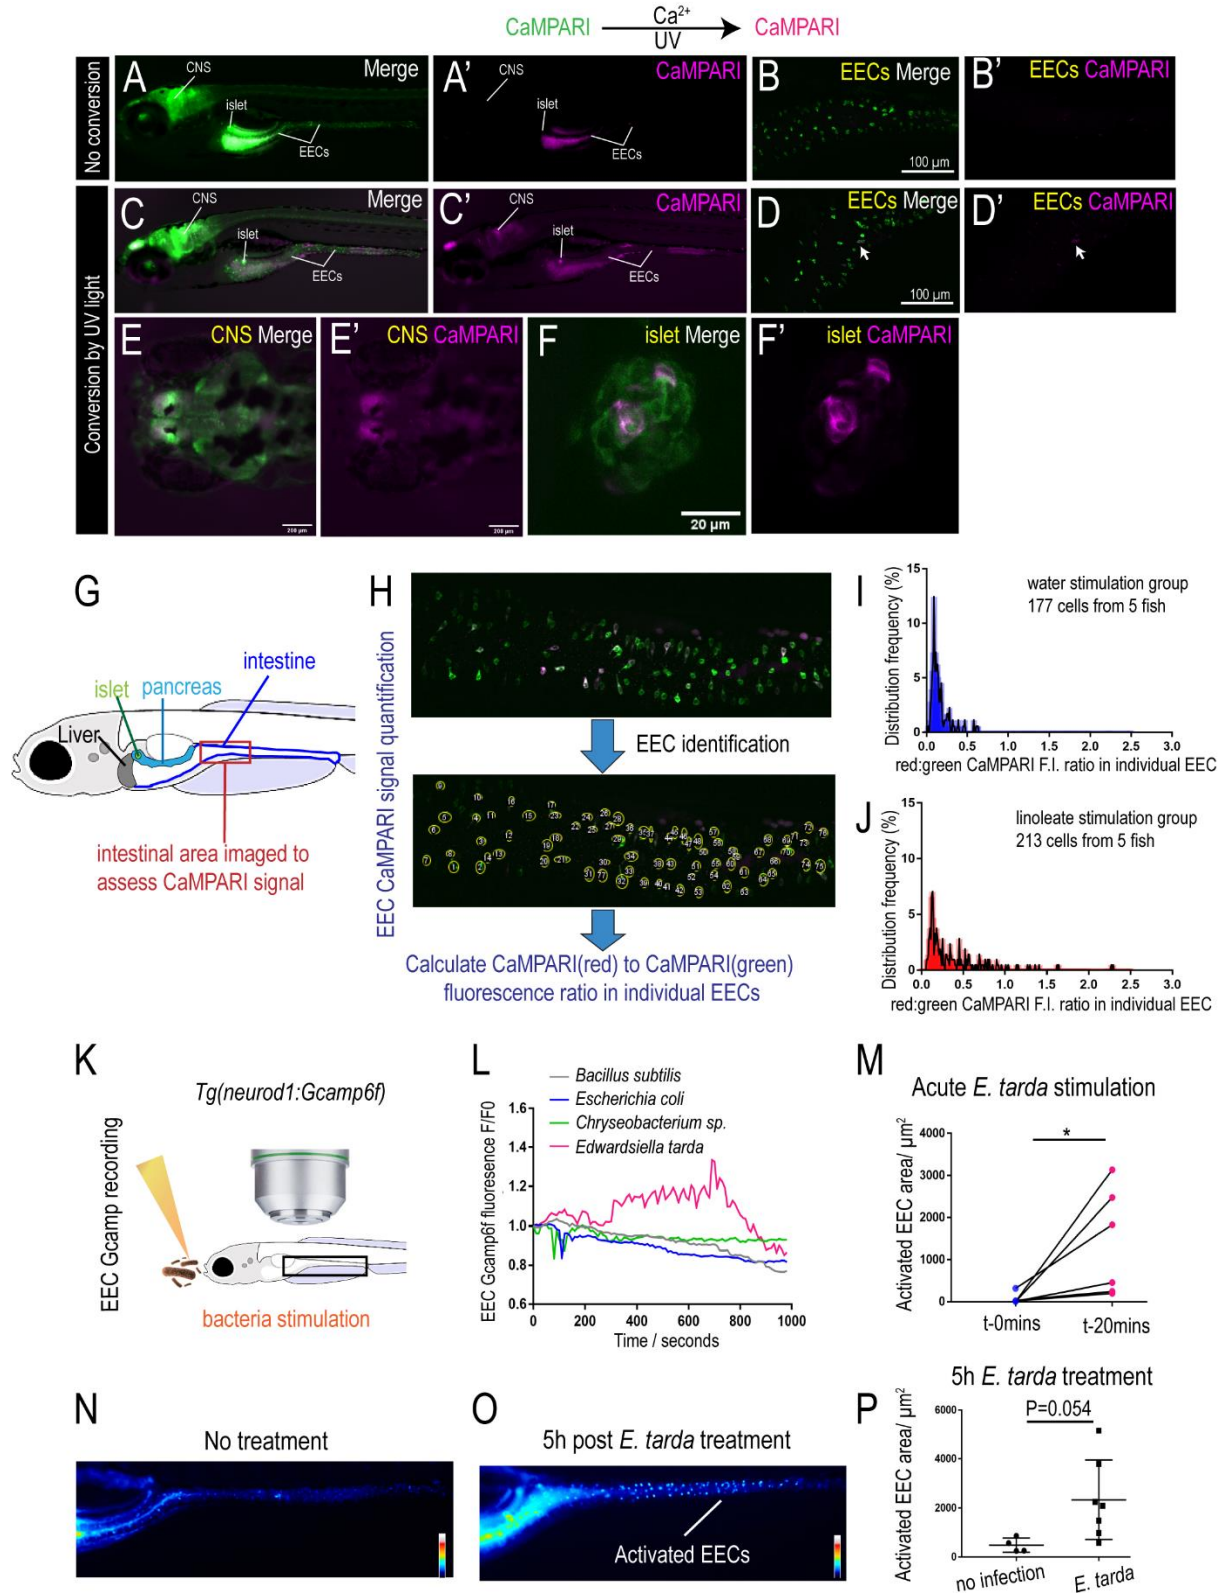

**Figure S1. *E. tarda* activates EECs *in vivo*, related to Figure 1.**

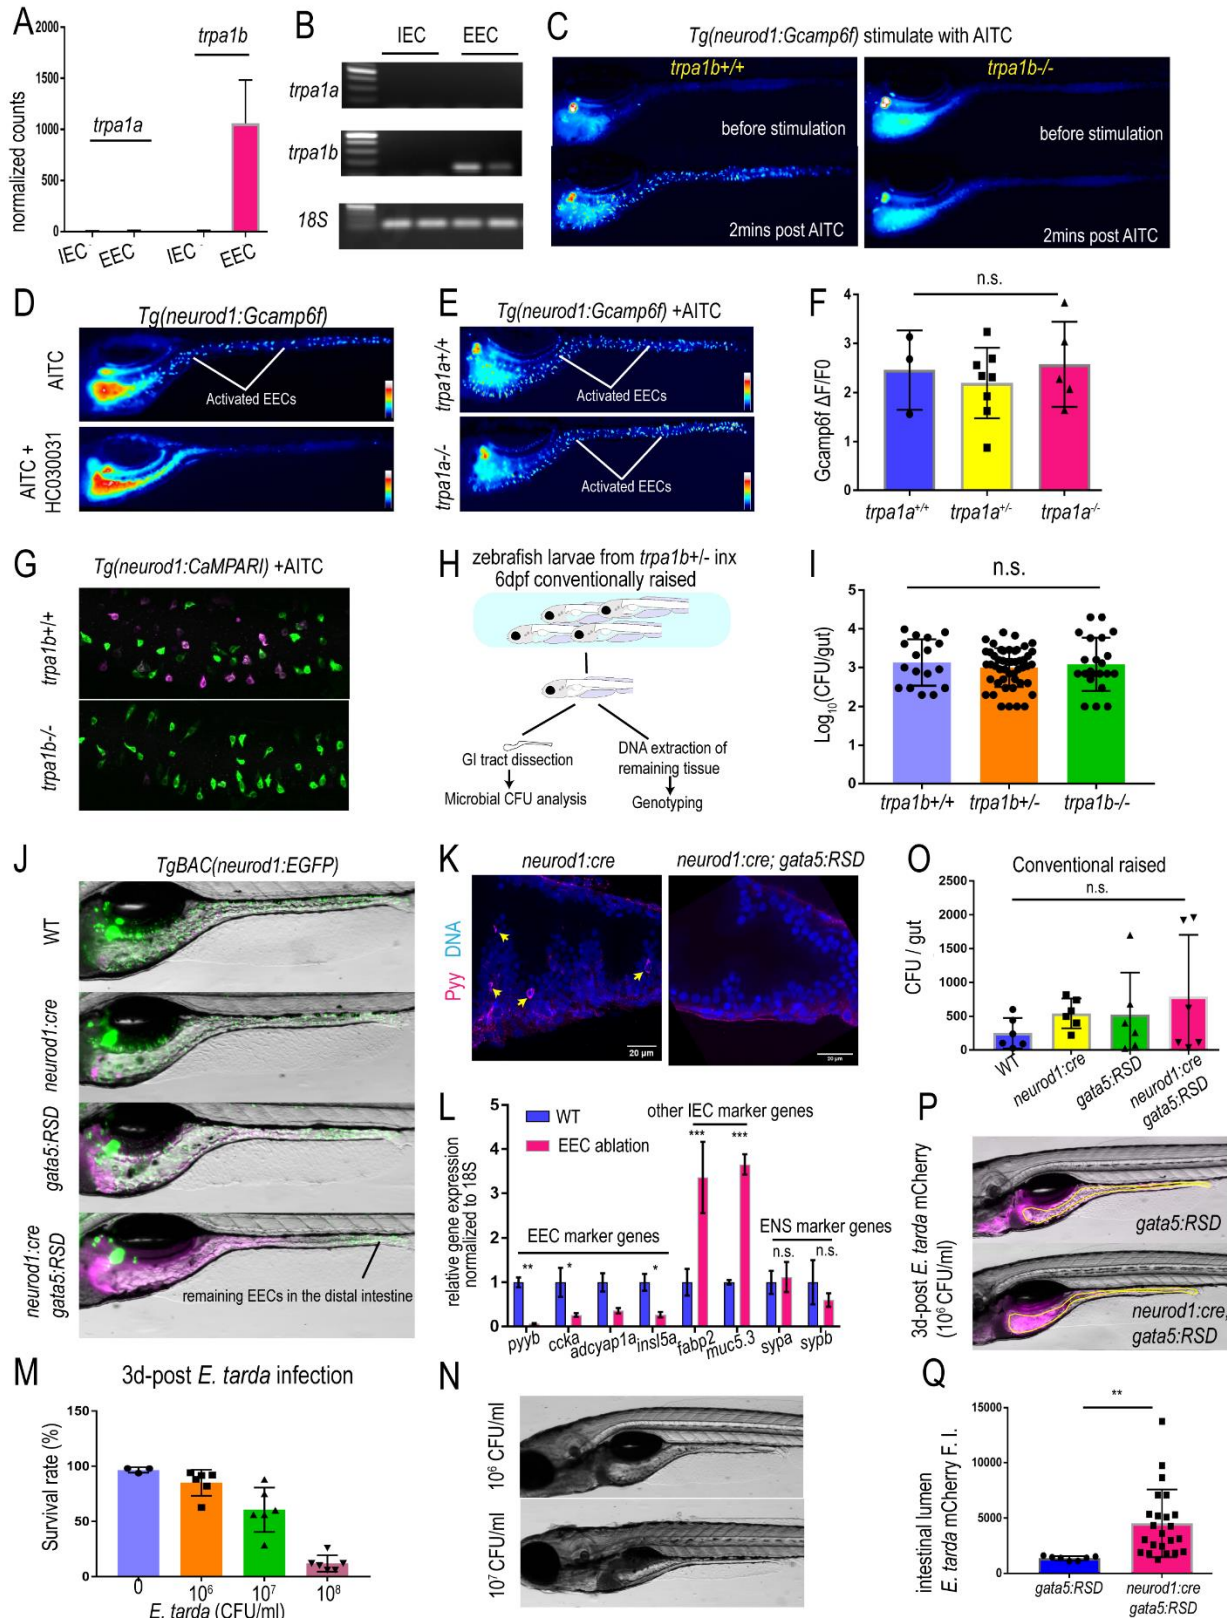

**Figure S2. EECs express *trpa1b* and respond to Trpa1 agonist, related to Main Figure 2 and Figure 3.**

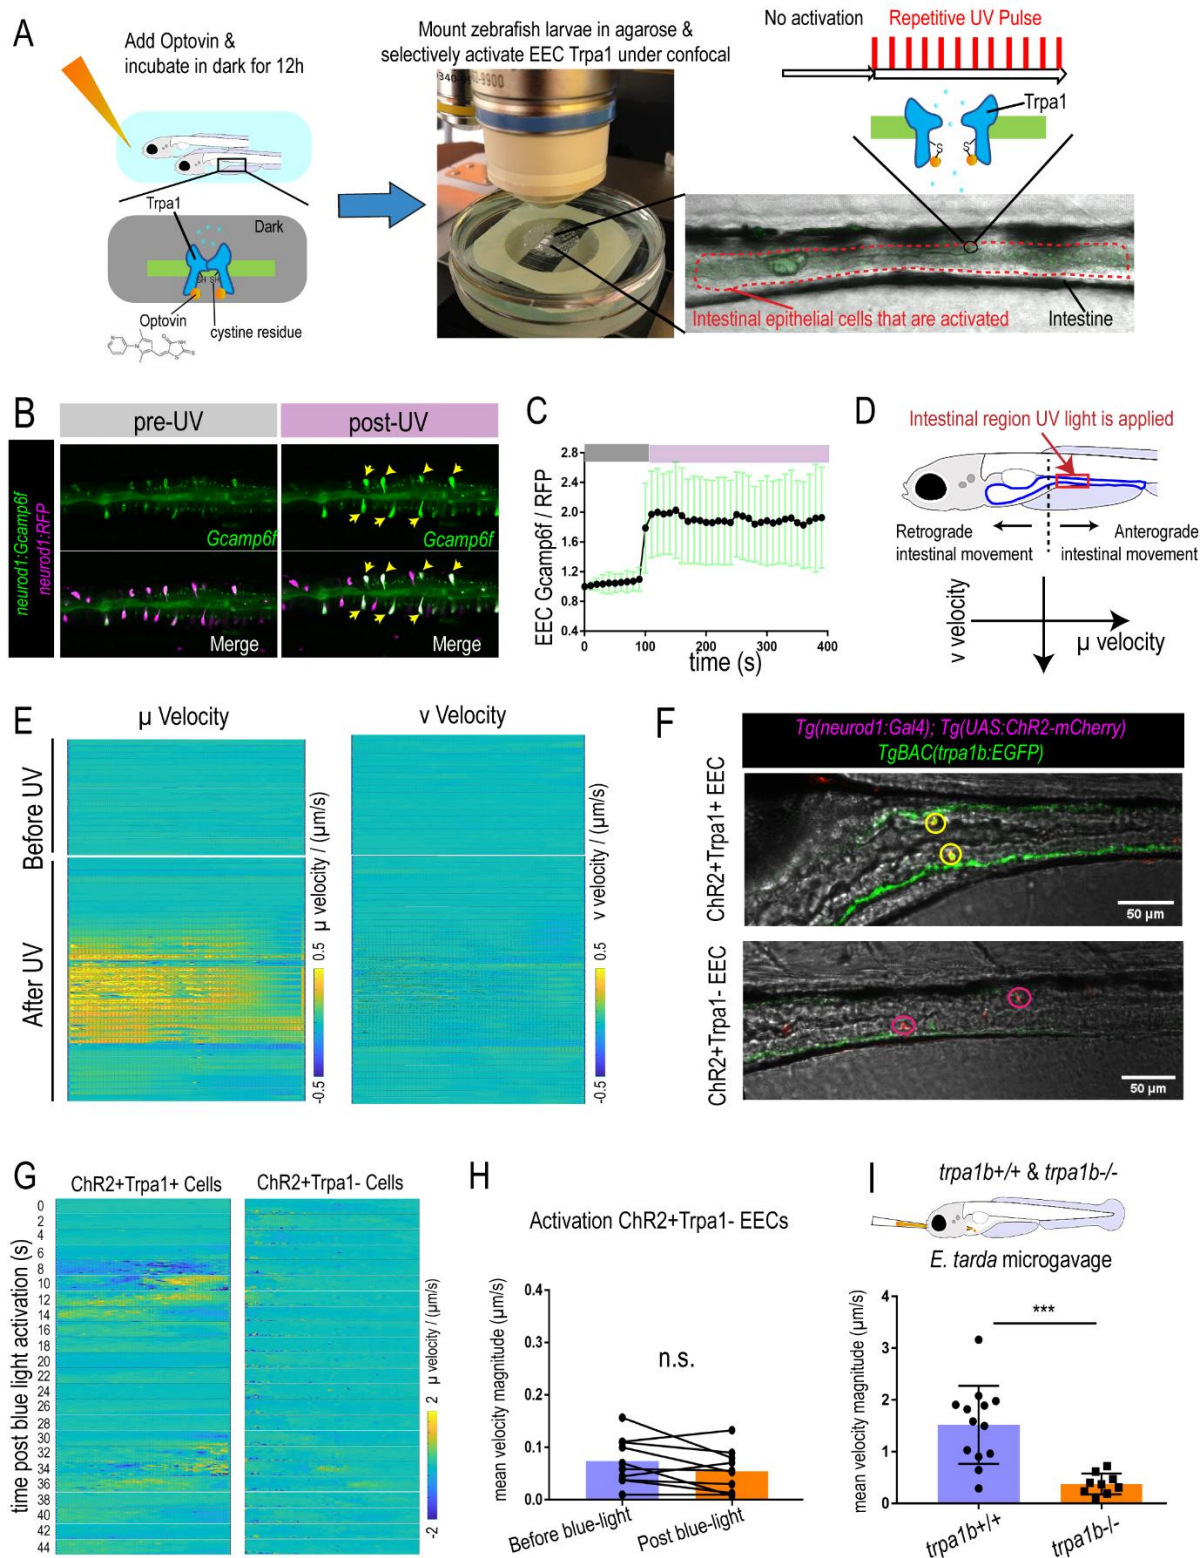

**Figure S3. Activation of EEC Trpa1 signaling promotes intestinal motility, related to Main Figure 4.**

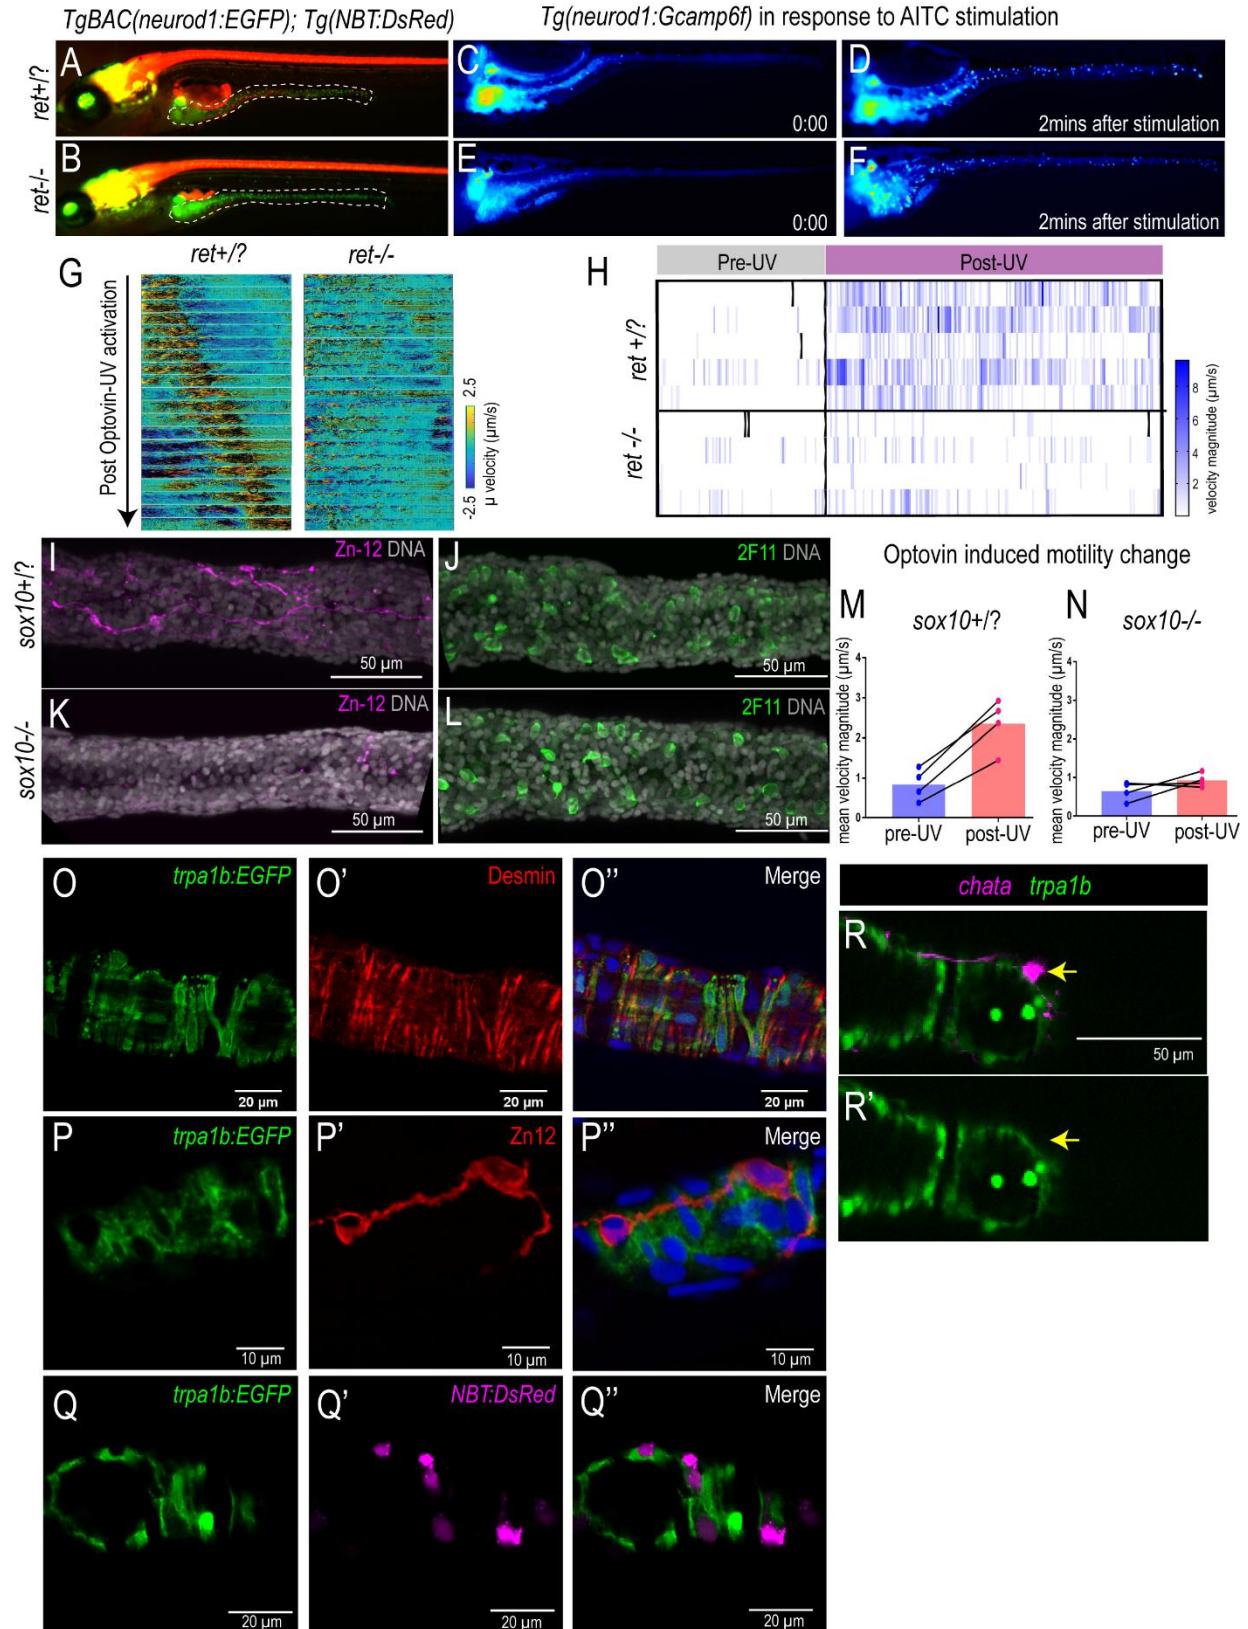

**Figure S4. The role of the enteric nervous system in EEC Trpa1-induced intestinal motility, related to Main Figure 5.**

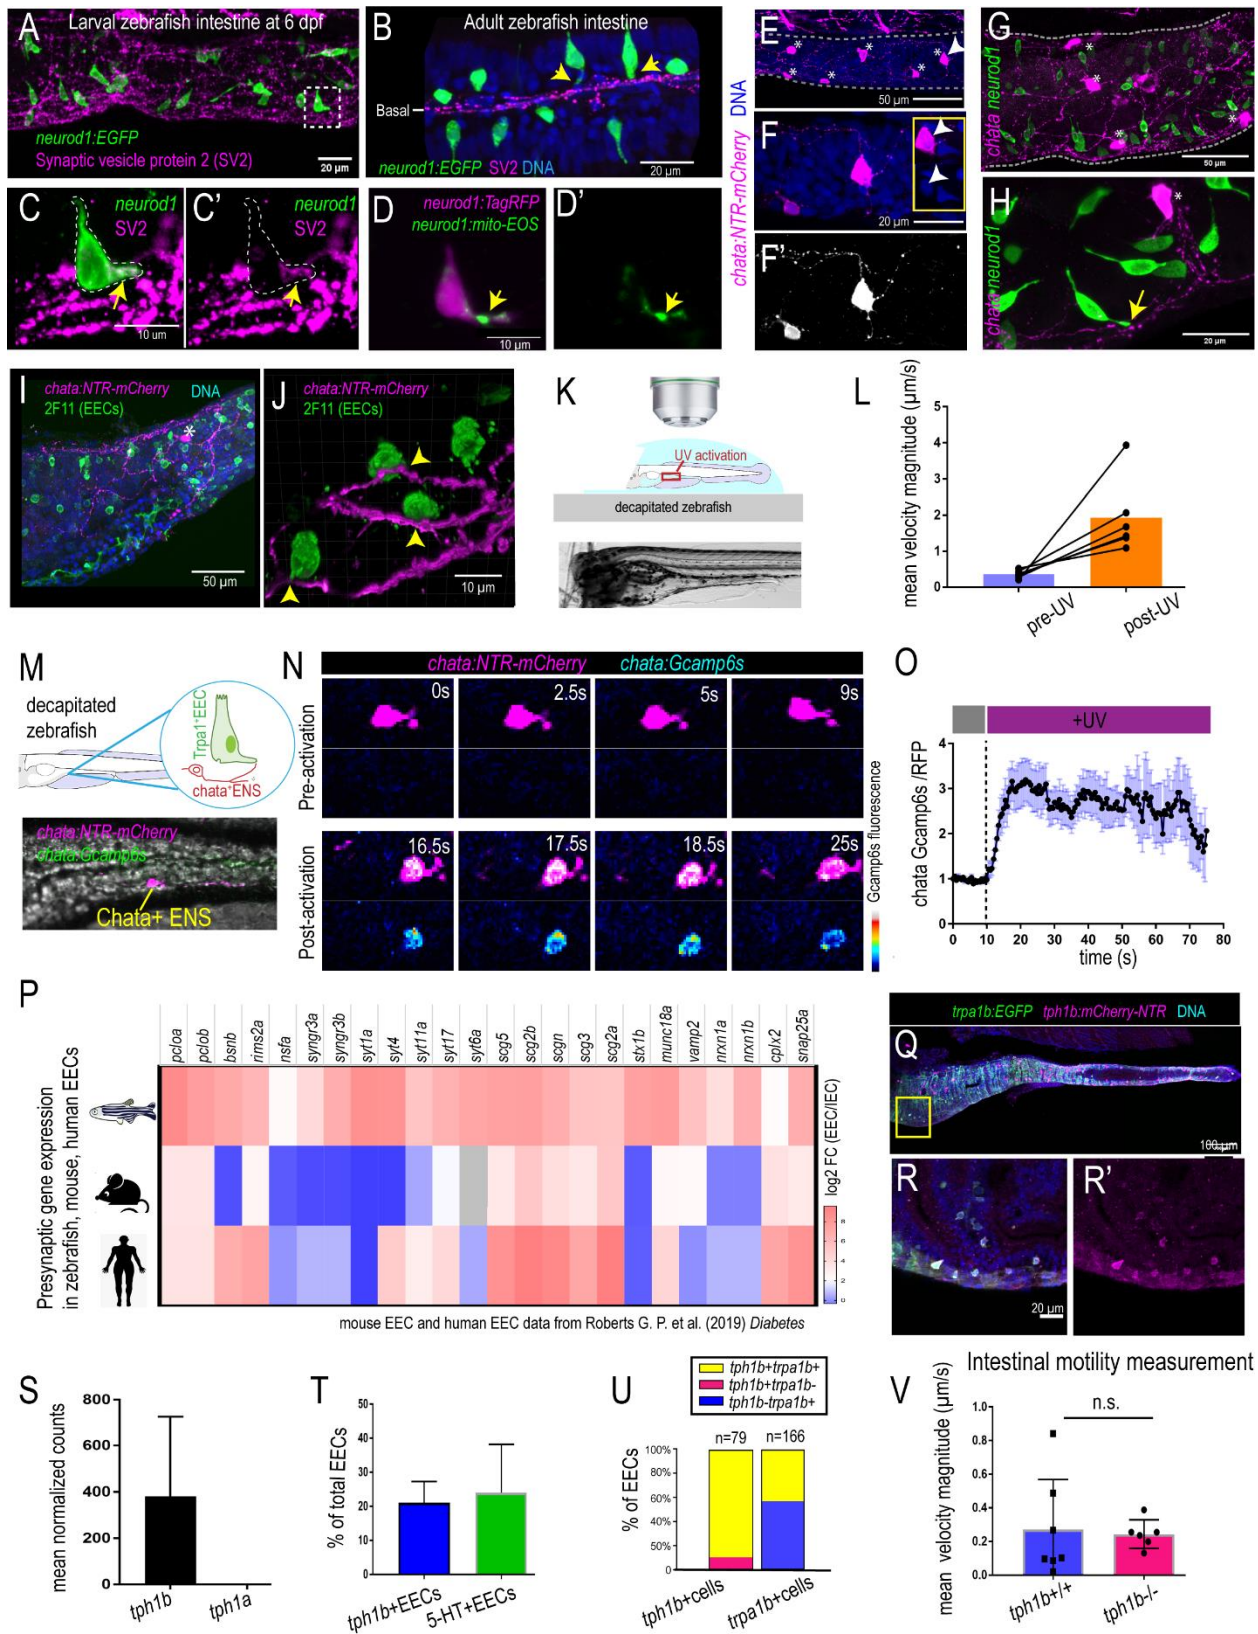

**Figure S5. Zebrafish EECs directly communicate with *chata*+ ENS, related to Main Figure 5.**

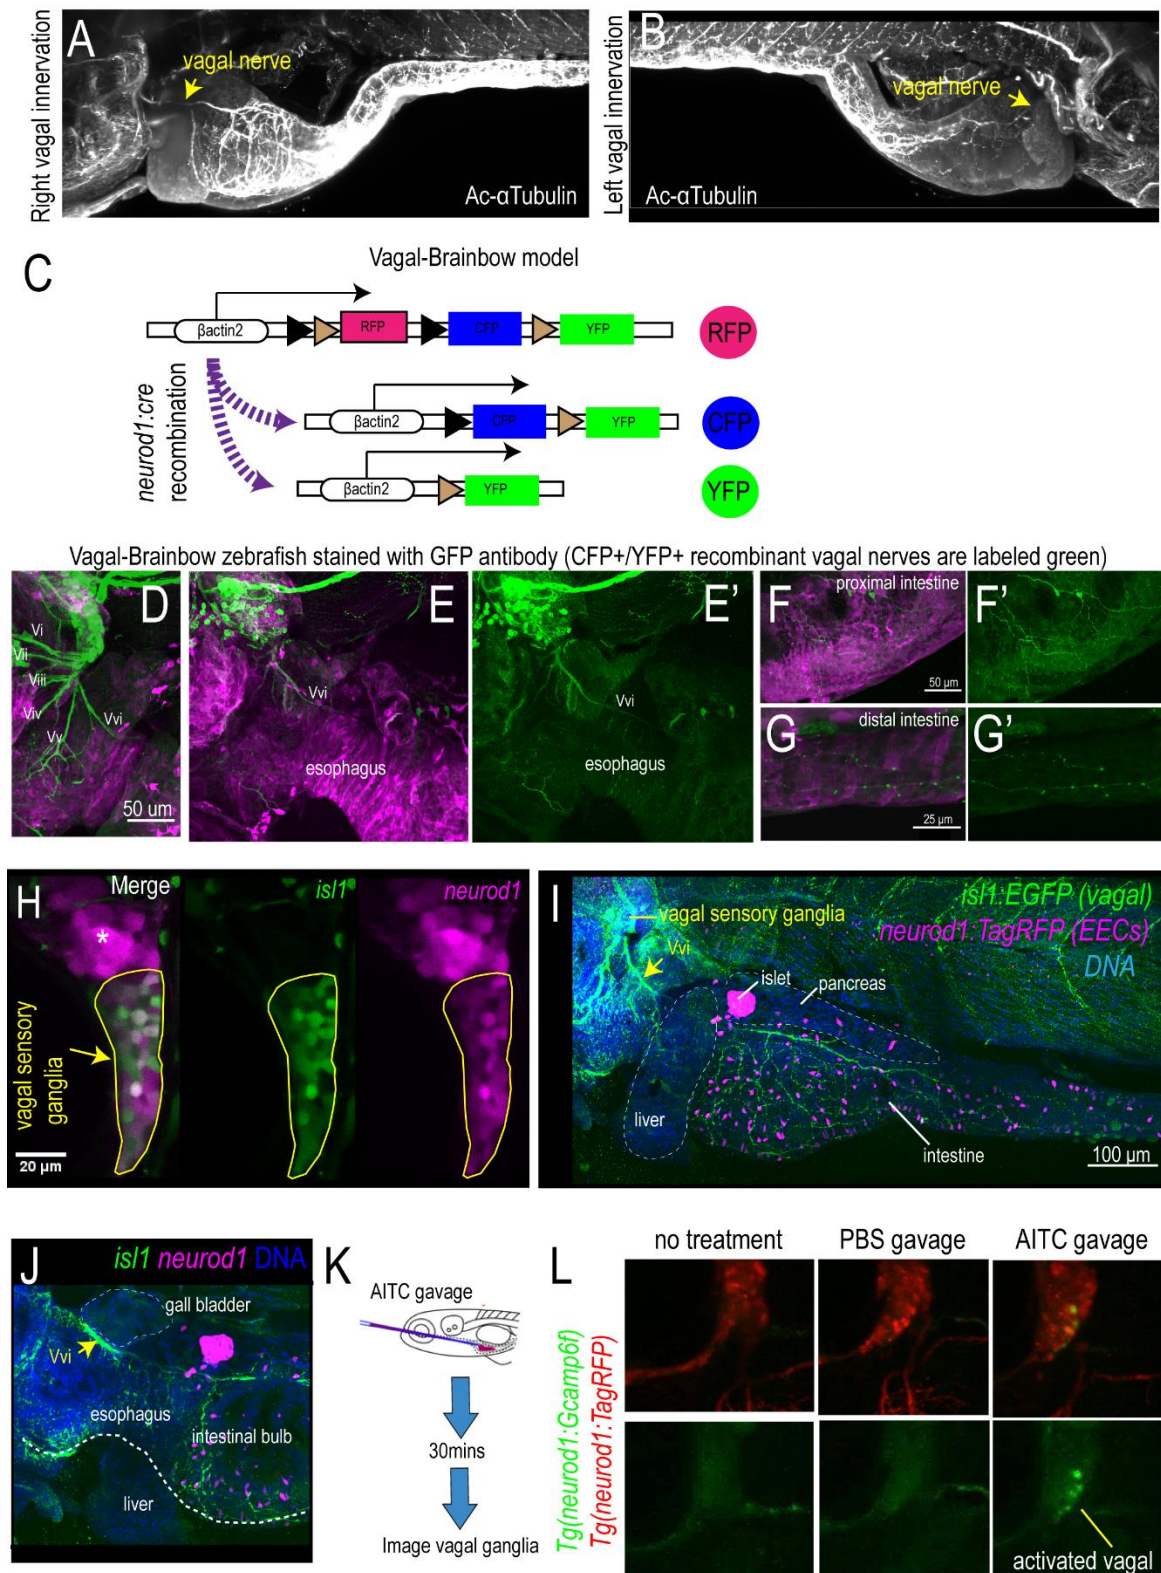

**Figure S6. Zebrafish vagal sensory nerve innervate the intestine, related to Main Figure 6.**

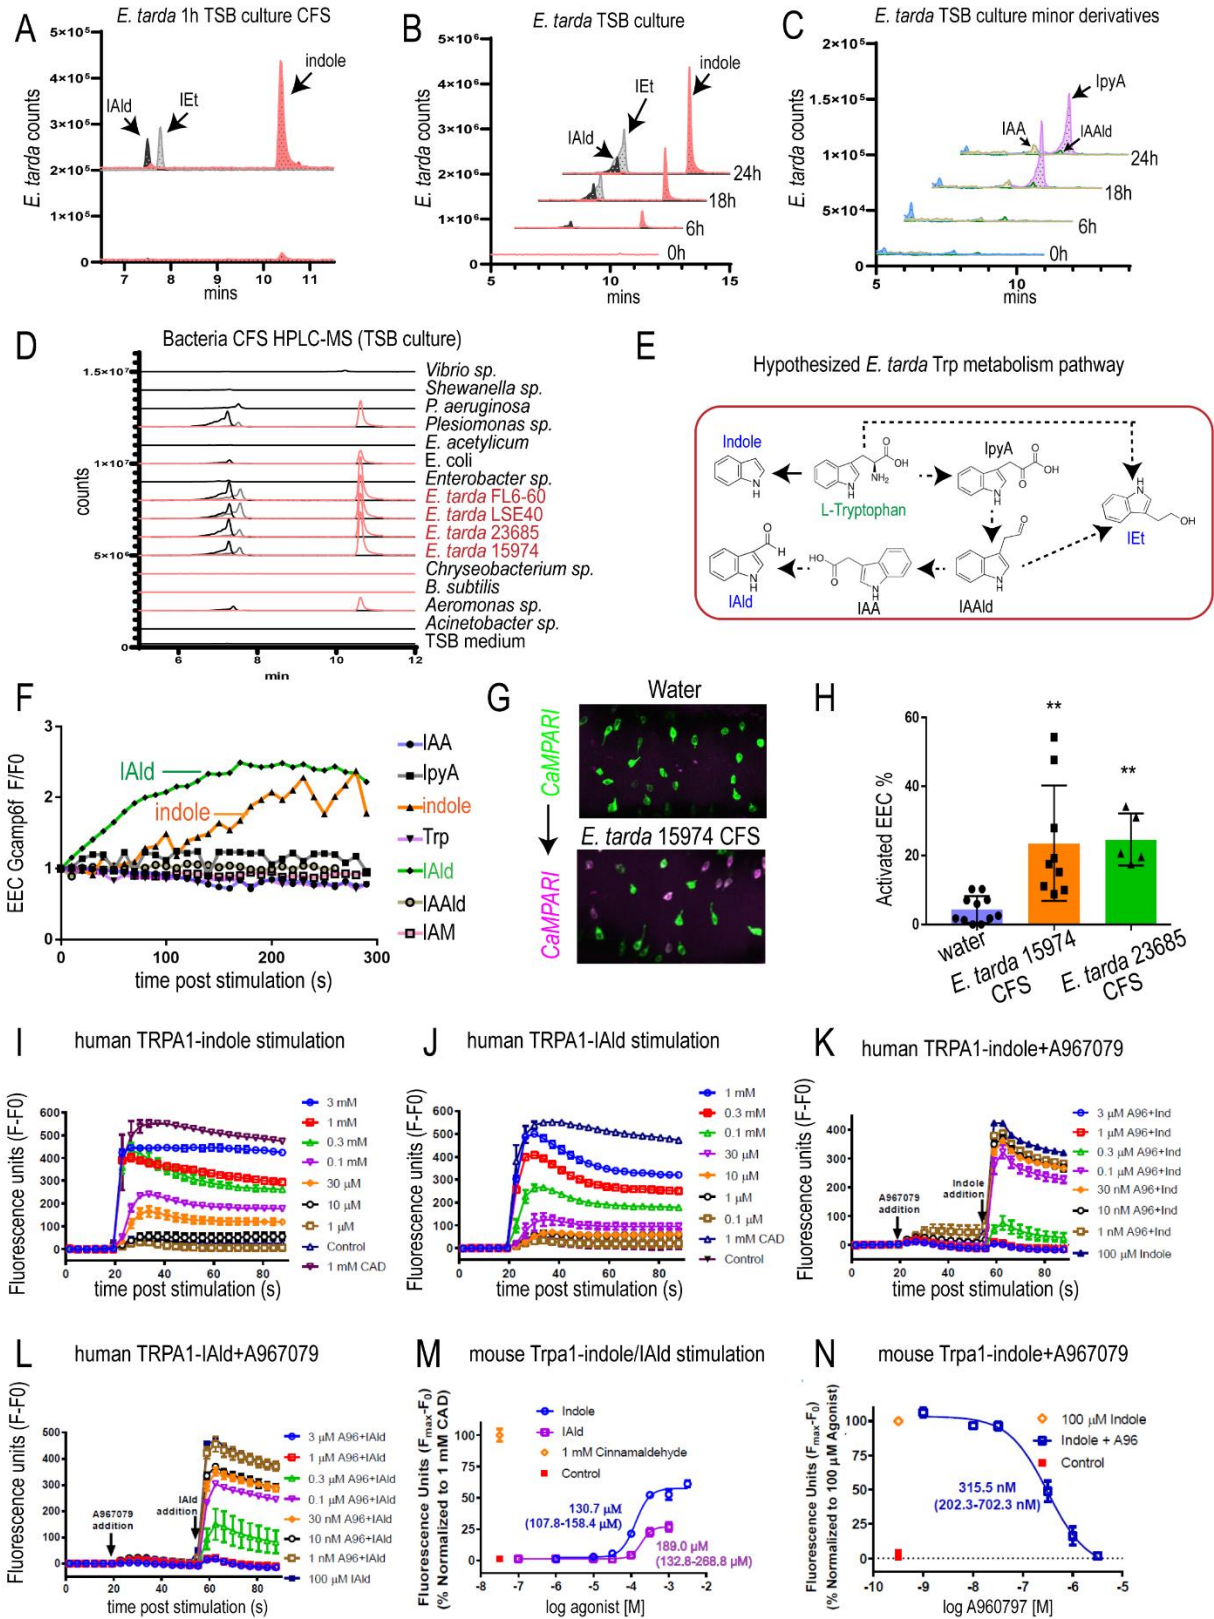

**Figure S7. *E. tarda* secretes tryptophan catabolites indole and IAld that activate Trpa1, related to Main Figure 7.**

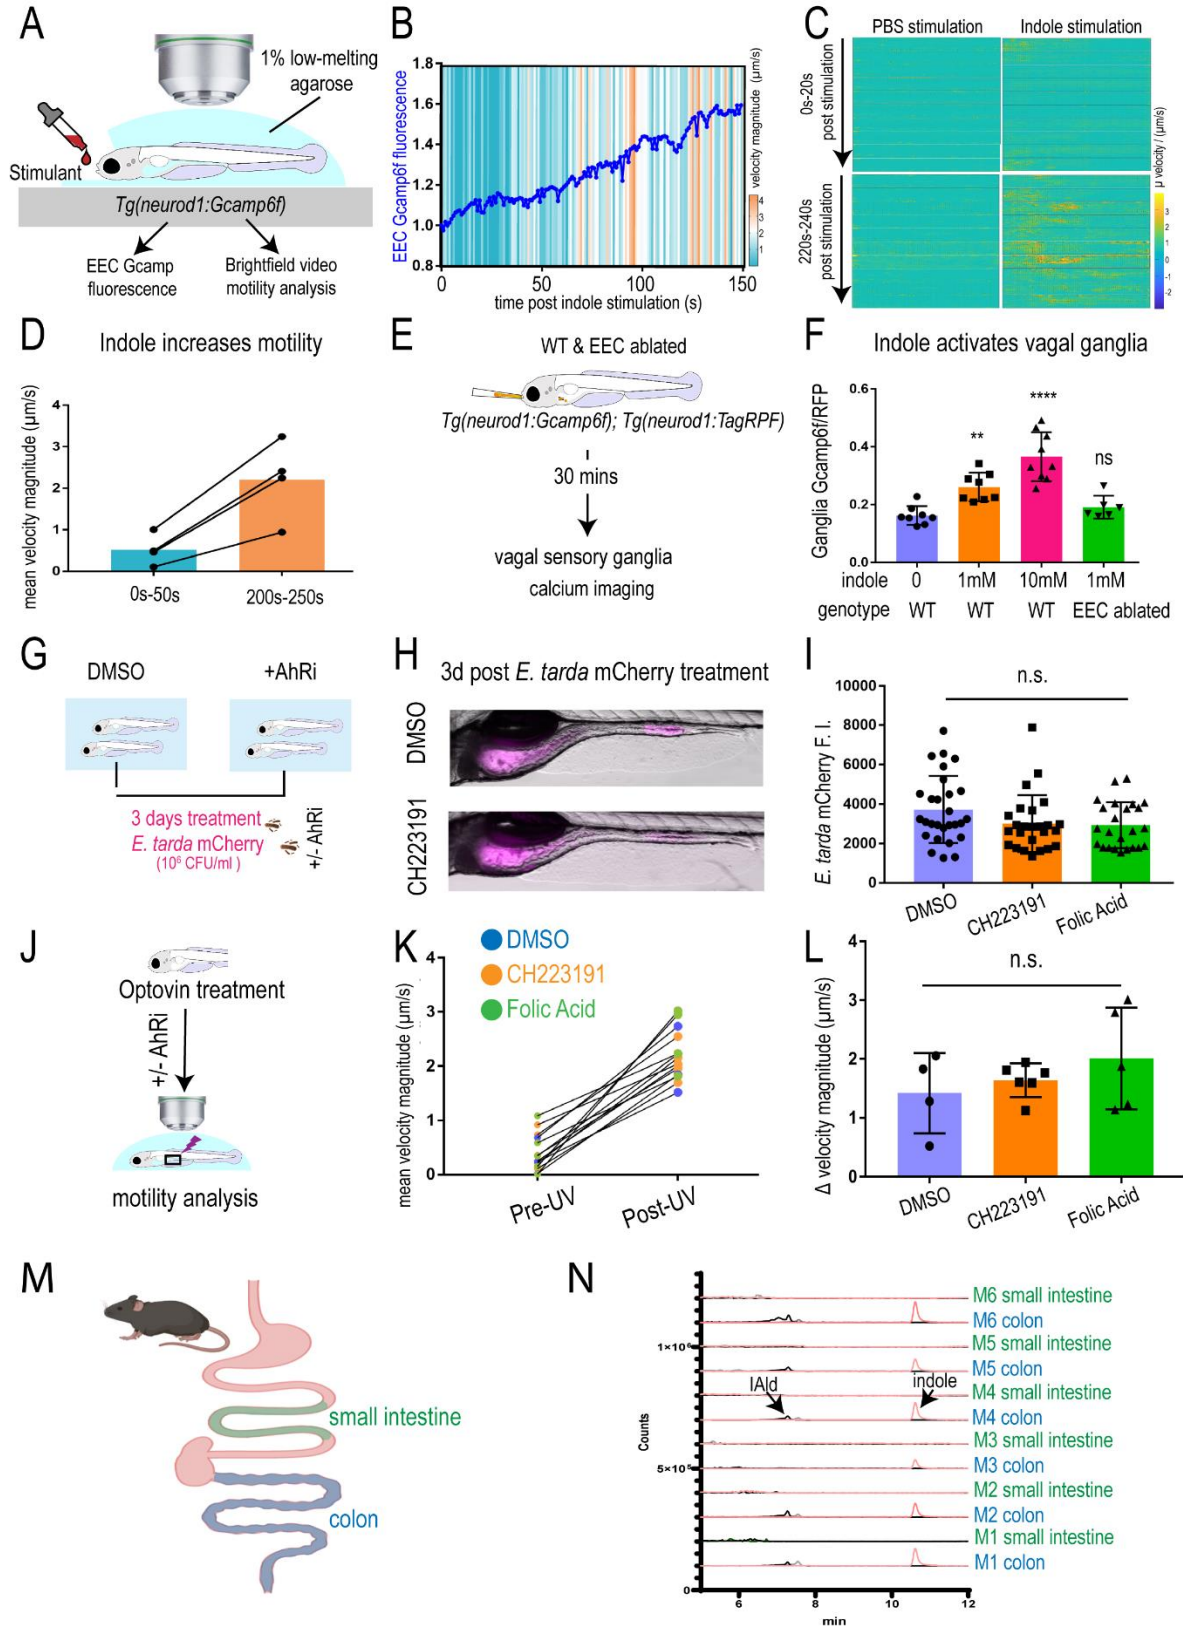

**Figure S8. Effects of tryptophan catabolites and AhR inhibitor on intestinal motility, related to Main Figure 7.**
